# Supplementary material for: The GRE in Public Health Admissions: Barriers, Waivers, and Moving Forward
Source: Preprints.org preprint supplement (doi:10.20944/preprints202009.0594.v1), 2020-09-25
Supplement: Supplementary file 3 [file supplementary]

## Sheet: Sheet1
Institution	Location	Ranking (All)	US News Score (2019)	Concentration	Degree	GRE Not Required	GRE Temp Waived for COVID19 (Current)	GRE Temp Waived for COVID19	No Universal GRE Waiver	Optional GRE Submit?	Format	Program Link	Archive of GRE Temp Waiver	Grad Degree	Masters	Doctoral	Biostats	Epid	Environmental / Occup/ Tox/ Indust Hyg	Policy/ Mang/ Services	Social/ Behavior/ Edu/ Promotion/ Community
Johns Hopkins University	Baltimore, MD	1	4.8	Environmental Health	DrPH				X		In person	https://ehe.jhu.edu/graduate/doctoral-programs/doctor-of-public-health-in-environmental-health/		X		X			X
Johns Hopkins University	Baltimore, MD	1	4.8	Health Equity and Social Justice	DrPH				X		In person	https://www.jhsph.edu/academics/degree-programs/doctoral-programs/doctor-of-public-health/Health-equity-social-justice.html		X		X
Johns Hopkins University	Baltimore, MD	1	4.8	Health Policy and Management	DrPH				X		In person	https://www.jhsph.edu/departments/health-policy-and-management/degree-programs/drph-in-health-policy-and-management/schoolwide-drph-hpm-program.html		X		X				X
Johns Hopkins University	Baltimore, MD	1	4.8	Implementation Science	DrPH				X		In person	https://www.jhsph.edu/academics/degree-programs/doctoral-programs/doctor-of-public-health/implementation-science.html		X		X
Johns Hopkins University	Baltimore, MD	1	4.8	Public Health Biology	MA		X	Fall 2021		optional	In person	https://www.jhsph.edu/academics/degree-programs/interdepartmental-programs/master-of-arts-in-public-health-biology/index.html	https://web.archive.org/web/20200823190736/https://www.jhsph.edu/admissions/how-to-apply/standardized-test-scores.html	X	X
Johns Hopkins University	Baltimore, MD	1	4.8	Biochemistry and Molecular Biology	MAPHB	X				optional	Online	https://www.jhsph.edu/academics/degree-programs/interdepartmental-programs/master-of-arts-in-public-health-biology/index.html	https://web.archive.org/web/20200830171531/https://www.jhsph.edu/departments/biochemistry-and-molecular-biology/for-prospective-students/apply-to-a-bmb-masters-of-science-program.html	X	X
Johns Hopkins University	Baltimore, MD	1	4.8	Community-based Primary Health Care Programs in Global Health	MAS		X	Fall 2021		optional	Online	https://www.jhsph.edu/academics/online-programs-and-learning/online-programs-for-applied-learning/master-of-applied-science-in-community-based-primary-health-care-programs-in-global-health/	https://web.archive.org/web/20200823190736/https://www.jhsph.edu/admissions/how-to-apply/standardized-test-scores.html	X	X						X
Johns Hopkins University	Baltimore, MD	1	4.8	Global Health Planning and Management	MAS		X	Fall 2021		optional	Online	https://www.jhsph.edu/academics/online-programs-and-learning/online-programs-for-applied-learning/master-of-applied-science-in-global-health-planning-and-management/	https://web.archive.org/web/20200823190736/https://www.jhsph.edu/admissions/how-to-apply/standardized-test-scores.html	X	X					X
Johns Hopkins University	Baltimore, MD	1	4.8	Humanitarian Health	MAS		X	Fall 2021		optional	Online	https://www.jhsph.edu/academics/online-programs-and-learning/online-programs-for-applied-learning/master-of-applied-science-in-humanitarian-health/	https://web.archive.org/web/20200823190736/https://www.jhsph.edu/admissions/how-to-apply/standardized-test-scores.html	X	X
Johns Hopkins University	Baltimore, MD	1	4.8	Patient Safety and Healthcare Quality	MAS		X	Fall 2021		optional	Online	https://www.jhsph.edu/academics/online-programs-and-learning/online-programs-for-applied-learning/master-of-applied-science-patient-safety-and-healthcare-quality/	https://web.archive.org/web/20200823190736/https://www.jhsph.edu/admissions/how-to-apply/standardized-test-scores.html	X	X
Johns Hopkins University	Baltimore, MD	1	4.8	Population Health Management	MAS		X	Fall 2021		optional	Online	https://www.jhsph.edu/academics/online-programs-and-learning/online-programs-for-applied-learning/master-of-applied-science-population-health-management/	https://web.archive.org/web/20200823190736/https://www.jhsph.edu/admissions/how-to-apply/standardized-test-scores.html	X	X					X
Johns Hopkins University	Baltimore, MD	1	4.8	Spatial Analysis for Public Health	MAS		X	Fall 2021		optional	Online	https://www.jhsph.edu/academics/online-programs-and-learning/online-programs-for-applied-learning/master-of-applied-science-in-spatial-analysis/	https://web.archive.org/web/20200823190736/https://www.jhsph.edu/admissions/how-to-apply/standardized-test-scores.html	X	X
Johns Hopkins University	Baltimore, MD	1	4.8	Bioethics	MBE		X	Fall 2021		optional	In person	https://www.jhsph.edu/academics/degree-programs/masters-programs/master-of-bioethics/	https://web.archive.org/web/20200823190736/https://www.jhsph.edu/admissions/how-to-apply/standardized-test-scores.html	X	X
Johns Hopkins University	Baltimore, MD	1	4.8	Health Administration	MHA		X	Fall 2021		strongly recommended	In person	https://www.jhsph.edu/academics/degree-programs/masters-programs/master-of-health-administration/	https://web.archive.org/web/20200823190736/https://www.jhsph.edu/admissions/how-to-apply/standardized-test-scores.html	X	X
Johns Hopkins University	Baltimore, MD	1	4.8	Biochemistry and Molecular Biology	MHS	X				optional	In person	https://www.jhsph.edu/departments/biochemistry-and-molecular-biology/degree-programs/master-of-health-science.html	https://web.archive.org/web/20200830171531/https://www.jhsph.edu/departments/biochemistry-and-molecular-biology/for-prospective-students/apply-to-a-bmb-masters-of-science-program.html	X	X
Johns Hopkins University	Baltimore, MD	1	4.8	Biostatistics	MHS		X	Fall 2021		optional	In person	https://www.jhsph.edu/departments/biostatistics/academics-and-student-life/degree-programs/mhs/	https://web.archive.org/web/20200823190736/https://www.jhsph.edu/admissions/how-to-apply/standardized-test-scores.html	X	X		X
Johns Hopkins University	Baltimore, MD	1	4.8	Clinical Investigation	MHS				X		In person	https://www.jhsph.edu/academics/graduate-training-programs-in-clinical-investigation/degree-programs/		X	X
Johns Hopkins University	Baltimore, MD	1	4.8	Environmental Health	MHS		X	Fall 2021		optional	In person	https://ehe.jhu.edu/graduate/masters-programs/master-of-health-science-in-environmental-health/index.html	https://web.archive.org/web/20200823190736/https://www.jhsph.edu/admissions/how-to-apply/standardized-test-scores.html	X	X				X
Johns Hopkins University	Baltimore, MD	1	4.8	Epidemiology	MHS		X	Fall 2021		optional	In person	https://www.jhsph.edu/departments/epidemiology/degree-programs/master-of-health-science-and-master-of-science/index.html	https://web.archive.org/web/20200823190736/https://www.jhsph.edu/admissions/how-to-apply/standardized-test-scores.html	X	X			X
Johns Hopkins University	Baltimore, MD	1	4.8	Global Health Economics	MHS		X	Fall 2021		strongly recommended	In person	https://www.jhsph.edu/departments/international-health/global-health-masters-degrees/master-of-health-science-in-global-health-economics/index.html	https://web.archive.org/web/20200823190736/https://www.jhsph.edu/admissions/how-to-apply/standardized-test-scores.html	X	X			X
Johns Hopkins University	Baltimore, MD	1	4.8	Health Economics and Outcomes Research	MHS		X	Fall 2021		strongly recommended	In person	https://www.jhsph.edu/departments/health-policy-and-management/degree-programs/master-of-health-science-in-health-economics/index.html	https://web.archive.org/web/20200823190736/https://www.jhsph.edu/admissions/how-to-apply/standardized-test-scores.html	X	X
Johns Hopkins University	Baltimore, MD	1	4.8	Mental Health	MHS		X	Fall 2021		optional	In person	https://www.jhsph.edu/departments/mental-health/prospective-students-and-fellows/degree-programs/mhs-in-mental-health/	https://web.archive.org/web/20200823190736/https://www.jhsph.edu/admissions/how-to-apply/standardized-test-scores.html	X	X
Johns Hopkins University	Baltimore, MD	1	4.8	Molecular Microbiology and Immunology	MHS		X	Fall 2021		optional	In person	https://www.jhsph.edu/departments/w-harry-feinstone-department-of-molecular-microbiology-and-immunology/academics-and-degree-programs/mhs-program/	https://web.archive.org/web/20200823190736/https://www.jhsph.edu/admissions/how-to-apply/standardized-test-scores.html	X	X
Johns Hopkins University	Baltimore, MD	1	4.8	Population, Family, and Reproductive Health	MHS		X	Fall 2021		optional	In person	https://www.jhsph.edu/departments/population-family-and-reproductive-health/degree-programs/degree-program-mhs/	https://web.archive.org/web/20200823190736/https://www.jhsph.edu/admissions/how-to-apply/standardized-test-scores.html	X	X
Johns Hopkins University	Baltimore, MD	1	4.8	Social Factors in Health	MHS		X	Fall 2021		optional	In person	https://www.jhsph.edu/departments/health-behavior-and-society/degree-programs/mhs-in-social-factors-in-health/	https://web.archive.org/web/20200823190736/https://www.jhsph.edu/admissions/how-to-apply/standardized-test-scores.html	X	X						X
Johns Hopkins University	Baltimore, MD	1	4.8	Aging and Public Health	MPH		X	Fall 2021		optional	In person	https://www.jhsph.edu/academics/degree-programs/master-of-public-health/curriculum/concentrations.html	https://web.archive.org/web/20200823190736/https://www.jhsph.edu/admissions/how-to-apply/standardized-test-scores.html	X	X
Johns Hopkins University	Baltimore, MD	1	4.8	Child and Adolescent Health	MPH		X	Fall 2021		optional	In person	https://www.jhsph.edu/academics/degree-programs/master-of-public-health/curriculum/concentrations.html	https://web.archive.org/web/20200823190736/https://www.jhsph.edu/admissions/how-to-apply/standardized-test-scores.html	X	X
Johns Hopkins University	Baltimore, MD	1	4.8	Epidemiologic and Biostatistical Methods for Public Health and Clinical Research	MPH		X	Fall 2021		optional	In person	https://www.jhsph.edu/academics/degree-programs/master-of-public-health/curriculum/concentrations.html	https://web.archive.org/web/20200823190736/https://www.jhsph.edu/admissions/how-to-apply/standardized-test-scores.html	X	X		X	X
Johns Hopkins University	Baltimore, MD	1	4.8	Food Systems and Public Health	MPH		X	Fall 2021		optional	In person	https://www.jhsph.edu/academics/degree-programs/master-of-public-health/curriculum/concentrations.html	https://web.archive.org/web/20200823190736/https://www.jhsph.edu/admissions/how-to-apply/standardized-test-scores.html	X	X
Johns Hopkins University	Baltimore, MD	1	4.8	Food, Nutrition and Health	MPH		X	Fall 2021		optional	In person	https://www.jhsph.edu/academics/degree-programs/master-of-public-health/curriculum/concentrations.html	https://web.archive.org/web/20200823190736/https://www.jhsph.edu/admissions/how-to-apply/standardized-test-scores.html	X	X
Johns Hopkins University	Baltimore, MD	1	4.8	Global Environmental Sustainability and Health	MPH		X	Fall 2021		optional	In person	https://www.jhsph.edu/academics/degree-programs/master-of-public-health/curriculum/concentrations.html	https://web.archive.org/web/20200823190736/https://www.jhsph.edu/admissions/how-to-apply/standardized-test-scores.html	X	X				X
Johns Hopkins University	Baltimore, MD	1	4.8	Health in Crisis and Humanitarian Assistance	MPH		X	Fall 2021		optional	In person	https://www.jhsph.edu/academics/degree-programs/master-of-public-health/curriculum/concentrations.html	https://web.archive.org/web/20200823190736/https://www.jhsph.edu/admissions/how-to-apply/standardized-test-scores.html	X	X
Johns Hopkins University	Baltimore, MD	1	4.8	Health Leadership and Management	MPH		X	Fall 2021		optional	In person	https://www.jhsph.edu/academics/degree-programs/master-of-public-health/curriculum/concentrations.html	https://web.archive.org/web/20200823190736/https://www.jhsph.edu/admissions/how-to-apply/standardized-test-scores.html	X	X					X
Johns Hopkins University	Baltimore, MD	1	4.8	Health Systems and Policy	MPH		X	Fall 2021		optional	In person	https://www.jhsph.edu/academics/degree-programs/master-of-public-health/curriculum/concentrations.html	https://web.archive.org/web/20200823190736/https://www.jhsph.edu/admissions/how-to-apply/standardized-test-scores.html	X	X					X
Johns Hopkins University	Baltimore, MD	1	4.8	Humanitarian Health	MPH		X	Fall 2021		optional	Online	https://www.jhsph.edu/academics/degree-programs/master-of-public-health/program-overview/PTIB%20Student%20Manual%202020-2021%20FINAL.pdf	https://web.archive.org/web/20200823190736/https://www.jhsph.edu/admissions/how-to-apply/standardized-test-scores.html	X	X
Johns Hopkins University	Baltimore, MD	1	4.8	Infectious Diseases	MPH		X	Fall 2021		optional	In person	https://www.jhsph.edu/academics/degree-programs/master-of-public-health/curriculum/concentrations.html	https://web.archive.org/web/20200823190736/https://www.jhsph.edu/admissions/how-to-apply/standardized-test-scores.html	X	X
Johns Hopkins University	Baltimore, MD	1	4.8	Public Health	MPH		X	Fall 2021		optional	Online	https://www.jhsph.edu/academics/degree-programs/master-of-public-health/program-overview/online-part-time.html	https://web.archive.org/web/20200823190736/https://www.jhsph.edu/admissions/how-to-apply/standardized-test-scores.html	X	X
Johns Hopkins University	Baltimore, MD	1	4.8	Social and Behavioral Sciences in Public Health	MPH		X	Fall 2021		optional	In person	https://www.jhsph.edu/academics/degree-programs/master-of-public-health/curriculum/concentrations.html	https://web.archive.org/web/20200823190736/https://www.jhsph.edu/admissions/how-to-apply/standardized-test-scores.html	X	X						X
Johns Hopkins University	Baltimore, MD	1	4.8	Women's and Reproductive Health	MPH		X	Fall 2021		optional	In person	https://www.jhsph.edu/academics/degree-programs/master-of-public-health/curriculum/concentrations.html	https://web.archive.org/web/20200823190736/https://www.jhsph.edu/admissions/how-to-apply/standardized-test-scores.html	X	X
Johns Hopkins University	Baltimore, MD	1	4.8	Toxicology for Human Risk Assessment	MS		X	Fall 2021		optional	In person	https://ehe.jhu.edu/graduate/masters-programs/master-of-science-in-toxicology-for-human-risk-assessment/	https://web.archive.org/web/20200823190736/https://www.jhsph.edu/admissions/how-to-apply/standardized-test-scores.html	X	X				X
Johns Hopkins University	Baltimore, MD	1	4.8	Global Disease Epidemiology and Control	MSPH		X	Fall 2021		strongly recommended	In person	https://www.jhsph.edu/departments/international-health/global-health-masters-degrees/master-of-science-in-public-health/	https://web.archive.org/web/20200823190736/https://www.jhsph.edu/admissions/how-to-apply/standardized-test-scores.html	X	X			X
Johns Hopkins University	Baltimore, MD	1	4.8	Health Education and Health Communication	MSPH		X	Fall 2021		optional	In person	https://www.jhsph.edu/departments/health-behavior-and-society/degree-programs/msph-in-health-education-and-health-communication/	https://web.archive.org/web/20200823190736/https://www.jhsph.edu/admissions/how-to-apply/standardized-test-scores.html	X	X						X
Johns Hopkins University	Baltimore, MD	1	4.8	Health Policy	MSPH		X	Fall 2021		optional	In person	https://www.jhsph.edu/departments/health-policy-and-management/degree-programs/master-of-science-in-public-health-in-health-policy/index.html	https://web.archive.org/web/20200823190736/https://www.jhsph.edu/admissions/how-to-apply/standardized-test-scores.html	X	X					X
Johns Hopkins University	Baltimore, MD	1	4.8	Health Systems	MSPH		X	Fall 2021		strongly recommended	In person	https://www.jhsph.edu/departments/international-health/global-health-masters-degrees/master-of-science-in-public-health/	https://web.archive.org/web/20200823190736/https://www.jhsph.edu/admissions/how-to-apply/standardized-test-scores.html	X	X
Johns Hopkins University	Baltimore, MD	1	4.8	Human Nutrition	MSPH		X	Fall 2021		strongly recommended	In person	https://www.jhsph.edu/departments/international-health/global-health-masters-degrees/master-of-science-in-public-health/	https://web.archive.org/web/20200823190736/https://www.jhsph.edu/admissions/how-to-apply/standardized-test-scores.html	X	X
Johns Hopkins University	Baltimore, MD	1	4.8	Population, Family, and Reproductive Health	MSPH		X	Fall 2021		optional	In person	https://www.jhsph.edu/departments/population-family-and-reproductive-health/degree-programs/degree-program-msph/index.html	https://web.archive.org/web/20200823190736/https://www.jhsph.edu/admissions/how-to-apply/standardized-test-scores.html	X	X
Johns Hopkins University	Baltimore, MD	1	4.8	Social and Behavioral Interventions	MSPH		X	Fall 2021		strongly recommended	In person	https://www.jhsph.edu/departments/international-health/global-health-masters-degrees/master-of-science-in-public-health/	https://web.archive.org/web/20200823190736/https://www.jhsph.edu/admissions/how-to-apply/standardized-test-scores.html	X	X						X
Johns Hopkins University	Baltimore, MD	1	4.8	Biochemistry and Molecular Biology	PhD	X				optional	In person	https://www.jhsph.edu/departments/biochemistry-and-molecular-biology/degree-programs/doctor-of-philosophy.html	https://web.archive.org/web/20200830171621/https://www.jhsph.edu/departments/biochemistry-and-molecular-biology/for-prospective-students/apply-to-the-bmb-doctor-of-philosophy-program.html	X		X
Johns Hopkins University	Baltimore, MD	1	4.8	Bioethics and Health Policy	PhD		X	Fall 2021		strongly recommended	In person	https://www.jhsph.edu/departments/health-policy-and-management/degree-programs/phd-in-health-policy-and-management/phd-concentration-in-bioethics-and-health-policy/	https://web.archive.org/web/20200823190736/https://www.jhsph.edu/admissions/how-to-apply/standardized-test-scores.html	X		X				X
Johns Hopkins University	Baltimore, MD	1	4.8	Biostatistics	PhD		X	Fall 2021		optional	In person	https://www.jhsph.edu/departments/biostatistics/academics-and-student-life/degree-programs/phd/	https://web.archive.org/web/20200823190736/https://www.jhsph.edu/admissions/how-to-apply/standardized-test-scores.html	X		X	X
Johns Hopkins University	Baltimore, MD	1	4.8	Cancer Epidemiology	PhD		X	Fall 2021		optional	In person	https://www.jhsph.edu/departments/epidemiology/tracks/cancer-epidemiology/	https://web.archive.org/web/20200823190736/https://www.jhsph.edu/admissions/how-to-apply/standardized-test-scores.html	X		X		X
Johns Hopkins University	Baltimore, MD	1	4.8	Cardiovascular and Clinical Epidemiology	PhD		X	Fall 2021		optional	In person	https://www.jhsph.edu/departments/epidemiology/tracks/cardiovascular-and-clinical-epidemiology/	https://web.archive.org/web/20200823190736/https://www.jhsph.edu/admissions/how-to-apply/standardized-test-scores.html	X		X		X
Johns Hopkins University	Baltimore, MD	1	4.8	Clinical Investigation	PhD				X		In person	https://www.jhsph.edu/academics/graduate-training-programs-in-clinical-investigation/degree-programs/		X		X
Johns Hopkins University	Baltimore, MD	1	4.8	Clinical Trials and Evidence Synthesis	PhD		X	Fall 2021		optional	In person	https://www.jhsph.edu/departments/epidemiology/tracks/clinical-trials-and-evidence-synthesis/	https://web.archive.org/web/20200823190736/https://www.jhsph.edu/admissions/how-to-apply/standardized-test-scores.html	X		X
Johns Hopkins University	Baltimore, MD	1	4.8	Environmental Epidemiology	PhD		X	Fall 2021		optional	In person	https://www.jhsph.edu/departments/epidemiology/tracks/environmental-epidemiology/	https://web.archive.org/web/20200823190736/https://www.jhsph.edu/admissions/how-to-apply/standardized-test-scores.html	X		X		X	X
Johns Hopkins University	Baltimore, MD	1	4.8	Epidemiology of Aging	PhD		X	Fall 2021		optional	In person	https://www.jhsph.edu/departments/epidemiology/tracks/epidemiology-of-aging/	https://web.archive.org/web/20200823190736/https://www.jhsph.edu/admissions/how-to-apply/standardized-test-scores.html	X		X		X
Johns Hopkins University	Baltimore, MD	1	4.8	Exposure Sciences and Environmental Epidemiology	PhD		X	Fall 2021		optional	In person	https://ehe.jhu.edu/graduate/doctoral-programs/doctor-of-philosophy-in-environmental-health/track-in-exposure-sciences-and-environmental-epidemiology/	https://web.archive.org/web/20200823190736/https://www.jhsph.edu/admissions/how-to-apply/standardized-test-scores.html	X		X		X	X
Johns Hopkins University	Baltimore, MD	1	4.8	General Epidemiology and Methodology	PhD		X	Fall 2021		optional	In person	https://www.jhsph.edu/departments/epidemiology/tracks/general-epidemiology/	https://web.archive.org/web/20200823190736/https://www.jhsph.edu/admissions/how-to-apply/standardized-test-scores.html	X		X		X
Johns Hopkins University	Baltimore, MD	1	4.8	Genetic Epidemiology	PhD		X	Fall 2021		optional	In person	https://www.jhsph.edu/departments/epidemiology/tracks/genetic-epidemiology/	https://web.archive.org/web/20200823190736/https://www.jhsph.edu/admissions/how-to-apply/standardized-test-scores.html	X		X		X
Johns Hopkins University	Baltimore, MD	1	4.8	Global Disease Epidemiology and Control	PhD		X	Fall 2021		strongly recommended	In person	https://www.jhsph.edu/departments/international-health/global-health-phd-doctor-of-philosophy/	https://web.archive.org/web/20200823190736/https://www.jhsph.edu/admissions/how-to-apply/standardized-test-scores.html	X		X		X
Johns Hopkins University	Baltimore, MD	1	4.8	Health and Public Policy	PhD		X	Fall 2021		strongly recommended	In person	https://www.jhsph.edu/departments/health-policy-and-management/degree-programs/phd-in-health-policy-and-management/phd-concentration-in-health-and-public-policy/	https://web.archive.org/web/20200823190736/https://www.jhsph.edu/admissions/how-to-apply/standardized-test-scores.html	X		X				X
Johns Hopkins University	Baltimore, MD	1	4.8	Health Economics and Policy	PhD		X	Fall 2021		strongly recommended	In person	https://www.jhsph.edu/departments/health-policy-and-management/degree-programs/phd-in-health-policy-and-management/phd-concentration-in-health-economics-and-policy/	https://web.archive.org/web/20200823190736/https://www.jhsph.edu/admissions/how-to-apply/standardized-test-scores.html	X		X				X
Johns Hopkins University	Baltimore, MD	1	4.8	Health Services Research and Policy	PhD		X	Fall 2021		strongly recommended	In person	https://www.jhsph.edu/departments/health-policy-and-management/degree-programs/phd-in-health-policy-and-management/phd-concentration-in-health-services-research-and-policy/	https://web.archive.org/web/20200823190736/https://www.jhsph.edu/admissions/how-to-apply/standardized-test-scores.html	X		X				X
Johns Hopkins University	Baltimore, MD	1	4.8	Health Systems	PhD		X	Fall 2021		strongly recommended	In person	https://www.jhsph.edu/departments/international-health/global-health-phd-doctor-of-philosophy/	https://web.archive.org/web/20200823190736/https://www.jhsph.edu/admissions/how-to-apply/standardized-test-scores.html	X		X
Johns Hopkins University	Baltimore, MD	1	4.8	Human Nutrition	PhD		X	Fall 2021		strongly recommended	In person	https://www.jhsph.edu/departments/international-health/global-health-phd-doctor-of-philosophy/	https://web.archive.org/web/20200823190736/https://www.jhsph.edu/admissions/how-to-apply/standardized-test-scores.html	X		X
Johns Hopkins University	Baltimore, MD	1	4.8	Infectious Disease Epidemiology	PhD		X	Fall 2021		optional	In person	https://www.jhsph.edu/departments/epidemiology/tracks/infectious-disease-epidemiology/	https://web.archive.org/web/20200823190736/https://www.jhsph.edu/admissions/how-to-apply/standardized-test-scores.html	X		X		X	X
Johns Hopkins University	Baltimore, MD	1	4.8	Mental Health	PhD		X	Fall 2021		optional	In person	https://www.jhsph.edu/departments/mental-health/prospective-students-and-fellows/degree-programs/phd-in-mental-health/	https://web.archive.org/web/20200823190736/https://www.jhsph.edu/admissions/how-to-apply/standardized-test-scores.html	X		X
Johns Hopkins University	Baltimore, MD	1	4.8	Molecular Microbiology and Immunology	PhD		X	Fall 2021		optional	In person	https://www.jhsph.edu/departments/w-harry-feinstone-department-of-molecular-microbiology-and-immunology/academics-and-degree-programs/phd-program/	https://web.archive.org/web/20200823190736/https://www.jhsph.edu/admissions/how-to-apply/standardized-test-scores.html	X		X
Johns Hopkins University	Baltimore, MD	1	4.8	Population, Family, and Reproductive Health	PhD		X	Fall 2021		optional	In person	https://www.jhsph.edu/departments/population-family-and-reproductive-health/degree-programs/degree-program-phd/	https://web.archive.org/web/20200823190736/https://www.jhsph.edu/admissions/how-to-apply/standardized-test-scores.html	X		X
Johns Hopkins University	Baltimore, MD	1	4.8	Social and Behavioral Interventions	PhD		X	Fall 2021		strongly recommended	In person	https://www.jhsph.edu/departments/international-health/global-health-phd-doctor-of-philosophy/	https://web.archive.org/web/20200823190736/https://www.jhsph.edu/admissions/how-to-apply/standardized-test-scores.html	X		X					X
Johns Hopkins University	Baltimore, MD	1	4.8	Social and Behavioral Sciences	PhD		X	Fall 2021		optional	In person	https://www.jhsph.edu/departments/health-behavior-and-society/degree-programs/phd-in-social-and-behavioral-sciences/	https://web.archive.org/web/20200823190736/https://www.jhsph.edu/admissions/how-to-apply/standardized-test-scores.html	X		X					X
Johns Hopkins University	Baltimore, MD	1	4.8	Toxicology, Physiology and Molecular Mechanisms	PhD		X	Fall 2021		optional	In person	https://ehe.jhu.edu/graduate/doctoral-programs/doctor-of-philosophy-in-environmental-health/track-in-toxicology-physiology-and-molecular-mechanisms/	https://web.archive.org/web/20200823190736/https://www.jhsph.edu/admissions/how-to-apply/standardized-test-scores.html	X		X			X
Johns Hopkins University	Baltimore, MD	1	4.8	Biochemistry and Molecular Biology	ScM	X				optional	In person	https://www.jhsph.edu/departments/biochemistry-and-molecular-biology/degree-programs/master-of-science.html#ScM	https://web.archive.org/web/20200830171531/https://www.jhsph.edu/departments/biochemistry-and-molecular-biology/for-prospective-students/apply-to-a-bmb-masters-of-science-program.html	X	X
Johns Hopkins University	Baltimore, MD	1	4.8	Biostatistics	ScM		X	Fall 2021		optional	In person	https://www.jhsph.edu/departments/biostatistics/academics-and-student-life/degree-programs/scm/	https://web.archive.org/web/20200823190736/https://www.jhsph.edu/admissions/how-to-apply/standardized-test-scores.html	X	X		X
Johns Hopkins University	Baltimore, MD	1	4.8	Environmental Health	ScM		X	Fall 2021		optional	In person	https://ehe.jhu.edu/graduate/masters-programs/master-of-science-in-environmental-health/index.html	https://web.archive.org/web/20200823190736/https://www.jhsph.edu/admissions/how-to-apply/standardized-test-scores.html	X	X				X
Johns Hopkins University	Baltimore, MD	1	4.8	Epidemiology	ScM		X	Fall 2021		optional	In person	https://www.jhsph.edu/departments/epidemiology/degree-programs/master-of-health-science-and-master-of-science/index.html	https://web.archive.org/web/20200823190736/https://www.jhsph.edu/admissions/how-to-apply/standardized-test-scores.html	X	X			X
Johns Hopkins University	Baltimore, MD	1	4.8	Genetic Counseling	ScM		X	Fall 2021		optional	In person	https://www.jhsph.edu/departments/health-behavior-and-society/degree-programs/scm-in-genetic-counseling/	https://web.archive.org/web/20200823190736/https://www.jhsph.edu/admissions/how-to-apply/standardized-test-scores.html	X	X
Johns Hopkins University	Baltimore, MD	1	4.8	Molecular Microbiology and Immunology	ScM		X	Fall 2021		optional	In person	https://www.jhsph.edu/departments/w-harry-feinstone-department-of-molecular-microbiology-and-immunology/academics-and-degree-programs/scm-program/	https://web.archive.org/web/20200823190736/https://www.jhsph.edu/admissions/how-to-apply/standardized-test-scores.html	X	X
Harvard University	Boston, MA	2 (tie)	4.6	Public Health	DrPH		X	Fall 2021		optional	In person	https://www.hsph.harvard.edu/drph/	https://web.archive.org/web/20200817152041/https://www.hsph.harvard.edu/admissions/admissions/how-to-apply/test-scores/	X		X
Harvard University	Boston, MA	2 (tie)	4.6	Health Care Management	MHCM		X	Fall 2021		optional	In person	https://www.hsph.harvard.edu/mhcm/	https://web.archive.org/web/20200817152041/https://www.hsph.harvard.edu/admissions/admissions/how-to-apply/test-scores/	X	X					X
Harvard University	Boston, MA	2 (tie)	4.6	Clinical Effectiveness	MPH		X	Fall 2021		optional	In person	https://www.hsph.harvard.edu/admissions/degree-programs/master-of-public-health/fields-of-study/	https://web.archive.org/web/20200817152041/https://www.hsph.harvard.edu/admissions/admissions/how-to-apply/test-scores/	X	X			X
Harvard University	Boston, MA	2 (tie)	4.6	Epidemiology	MPH		X	Fall 2021		optional	In person, online	https://www.hsph.harvard.edu/admissions/degree-programs/online-mph-in-epidemiology/	https://web.archive.org/web/20200817152041/https://www.hsph.harvard.edu/admissions/admissions/how-to-apply/test-scores/	X	X			X
Harvard University	Boston, MA	2 (tie)	4.6	Global Health	MPH		X	Fall 2021		optional	In person	https://www.hsph.harvard.edu/admissions/degree-programs/master-of-public-health/fields-of-study/	https://web.archive.org/web/20200817152041/https://www.hsph.harvard.edu/admissions/admissions/how-to-apply/test-scores/	X	X
Harvard University	Boston, MA	2 (tie)	4.6	Health and Social Behavior	MPH		X	Fall 2021		optional	In person	https://www.hsph.harvard.edu/admissions/degree-programs/master-of-public-health/fields-of-study/	https://web.archive.org/web/20200817152041/https://www.hsph.harvard.edu/admissions/admissions/how-to-apply/test-scores/	X	X						X
Harvard University	Boston, MA	2 (tie)	4.6	Health Management	MPH		X	Fall 2021		optional	In person	https://www.hsph.harvard.edu/admissions/degree-programs/master-of-public-health/fields-of-study/	https://web.archive.org/web/20200817152041/https://www.hsph.harvard.edu/admissions/admissions/how-to-apply/test-scores/	X	X					X
Harvard University	Boston, MA	2 (tie)	4.6	Health Policy	MPH		X	Fall 2021		optional	In person	https://www.hsph.harvard.edu/admissions/degree-programs/master-of-public-health/fields-of-study/	https://web.archive.org/web/20200817152041/https://www.hsph.harvard.edu/admissions/admissions/how-to-apply/test-scores/	X	X					X
Harvard University	Boston, MA	2 (tie)	4.6	Nutrition	MPH		X	Fall 2021		optional	In person	https://www.hsph.harvard.edu/admissions/degree-programs/master-of-public-health/fields-of-study/	https://web.archive.org/web/20200817152041/https://www.hsph.harvard.edu/admissions/admissions/how-to-apply/test-scores/	X	X
Harvard University	Boston, MA	2 (tie)	4.6	Occupational and Environmental Health	MPH		X	Fall 2021		optional	In person	https://www.hsph.harvard.edu/admissions/degree-programs/master-of-public-health/fields-of-study/	https://web.archive.org/web/20200817152041/https://www.hsph.harvard.edu/admissions/admissions/how-to-apply/test-scores/	X	X				X
Harvard University	Boston, MA	2 (tie)	4.6	Quantitative Methods	MPH		X	Fall 2021		optional	In person	https://www.hsph.harvard.edu/admissions/degree-programs/master-of-public-health/fields-of-study/	https://web.archive.org/web/20200817152041/https://www.hsph.harvard.edu/admissions/admissions/how-to-apply/test-scores/	X	X
Harvard University	Boston, MA	2 (tie)	4.6	Biological Sciences in Public Health	PhD	X				optional	In person	https://gsas.harvard.edu/programs-of-study/all/biological-sciences-public-health	https://web.archive.org/web/20200830164221/https://gsas.harvard.edu/programs-of-study/all/biological-sciences-public-health	X		X
Harvard University	Boston, MA	2 (tie)	4.6	Biostatistics	PhD				X		In person	https://www.hsph.harvard.edu/admissions/degree-programs/doctoral-degrees/phd-in-biostatistics/		X		X	X
Harvard University	Boston, MA	2 (tie)	4.6	Health Policy	PhD				X		In person	https://www.hsph.harvard.edu/admissions/degree-programs/doctoral-degrees/phd-in-health-policy/		X		X				X
Harvard University	Boston, MA	2 (tie)	4.6	Population Health Sciences	PhD				X		In person	https://www.hsph.harvard.edu/admissions/degree-programs/doctoral-degrees/phd-in-population-health-sciences/		X		X
Harvard University	Boston, MA	2 (tie)	4.6	Biostatistics	SM		X	Fall 2021		optional	In person	https://www.hsph.harvard.edu/biostatistics/for-prospective-students/	https://web.archive.org/web/20200817152041/https://www.hsph.harvard.edu/admissions/admissions/how-to-apply/test-scores/	X	X		X
Harvard University	Boston, MA	2 (tie)	4.6	Computational Biology and Quantitative Genetics	SM		X	Fall 2021		optional	In person	https://www.hsph.harvard.edu/sm-computational-biology/	https://web.archive.org/web/20200817152041/https://www.hsph.harvard.edu/admissions/admissions/how-to-apply/test-scores/	X	X
Harvard University	Boston, MA	2 (tie)	4.6	Environmental Health	SM		X	Fall 2021		optional	In person	https://www.hsph.harvard.edu/environmental-health/	https://web.archive.org/web/20200817152041/https://www.hsph.harvard.edu/admissions/admissions/how-to-apply/test-scores/	X	X				X
Harvard University	Boston, MA	2 (tie)	4.6	Epidemiology	SM		X	Fall 2021		optional	In person	https://www.hsph.harvard.edu/epidemiology/prospective-students/	https://web.archive.org/web/20200817152041/https://www.hsph.harvard.edu/admissions/admissions/how-to-apply/test-scores/	X	X			X
Harvard University	Boston, MA	2 (tie)	4.6	Global Health and Population	SM		X	Fall 2021		optional	In person	https://www.hsph.harvard.edu/global-health-and-population/prospective-students/master-of-science/	https://web.archive.org/web/20200817152041/https://www.hsph.harvard.edu/admissions/admissions/how-to-apply/test-scores/	X	X
Harvard University	Boston, MA	2 (tie)	4.6	Health Data Science	SM		X	Fall 2021		optional	In person	https://www.hsph.harvard.edu/health-data-science/	https://web.archive.org/web/20200817152041/https://www.hsph.harvard.edu/admissions/admissions/how-to-apply/test-scores/	X	X
Harvard University	Boston, MA	2 (tie)	4.6	Health Policy and Management	SM		X	Fall 2021		optional	In person	https://www.hsph.harvard.edu/health-policy-and-management/academic-programs/	https://web.archive.org/web/20200817152041/https://www.hsph.harvard.edu/admissions/admissions/how-to-apply/test-scores/	X	X					X
Harvard University	Boston, MA	2 (tie)	4.6	Social and Behavioral Sciences	SM		X	Fall 2021		optional	In person	https://www.hsph.harvard.edu/social-and-behavioral-sciences/prospective-students/	https://web.archive.org/web/20200817152041/https://www.hsph.harvard.edu/admissions/admissions/how-to-apply/test-scores/	X	X						X
University of North Carolina--Chapel Hill	Chapel Hill, NC	2 (tie)	4.6	Health Leadership	DrPH	X				-	Online	https://sph.unc.edu/hpm/hpm-drph/	https://web.archive.org/web/20200830164420/https://sph.unc.edu/sph-news/gillings-school-drops-gre-requirement-for-8-graduate-degrees/	X		X
University of North Carolina--Chapel Hill	Chapel Hill, NC	2 (tie)	4.6	Health Care Administration	MHA	X				-	Hybrid	https://sph.unc.edu/hpm/hpm-degrees-and-certificates/	https://web.archive.org/web/20200830164420/https://sph.unc.edu/sph-news/gillings-school-drops-gre-requirement-for-8-graduate-degrees/	X	X
University of North Carolina--Chapel Hill	Chapel Hill, NC	2 (tie)	4.6	Health Care Administration	MHA	X				-	In person	https://sph.unc.edu/hpm/hpm-residentialmha/	https://web.archive.org/web/20200830164420/https://sph.unc.edu/sph-news/gillings-school-drops-gre-requirement-for-8-graduate-degrees/	X	X
University of North Carolina--Chapel Hill	Chapel Hill, NC	2 (tie)	4.6	Applied Epidemiology	MPH	X				-	In person	https://sph.unc.edu/resource-pages/master-of-public-health/applied-epidemiology-concentration/	https://web.archive.org/web/20200830164420/https://sph.unc.edu/sph-news/gillings-school-drops-gre-requirement-for-8-graduate-degrees/	X	X			X
University of North Carolina--Chapel Hill	Chapel Hill, NC	2 (tie)	4.6	Environmental Health Solutions	MPH	X				-	In person	https://sph.unc.edu/resource-pages/master-of-public-health/environmental-health-solutions-concentration/	https://web.archive.org/web/20200830164420/https://sph.unc.edu/sph-news/gillings-school-drops-gre-requirement-for-8-graduate-degrees/	X	X				X
University of North Carolina--Chapel Hill	Chapel Hill, NC	2 (tie)	4.6	Global Health	MPH	X				-	In person	https://sph.unc.edu/resource-pages/master-of-public-health/global-health-concentration/	https://web.archive.org/web/20200830164420/https://sph.unc.edu/sph-news/gillings-school-drops-gre-requirement-for-8-graduate-degrees/	X	X
University of North Carolina--Chapel Hill	Chapel Hill, NC	2 (tie)	4.6	Health Behavior	MPH	X				-	In person	https://sph.unc.edu/resource-pages/master-of-public-health/health-behavior-concentration/	https://web.archive.org/web/20200830164420/https://sph.unc.edu/sph-news/gillings-school-drops-gre-requirement-for-8-graduate-degrees/	X	X						X
University of North Carolina--Chapel Hill	Chapel Hill, NC	2 (tie)	4.6	Health Equity, Social Justice And Human Rights	MPH	X				-	In person	https://sph.unc.edu/resource-pages/master-of-public-health/health-equity-social-justice-and-human-rights-concentration/	https://web.archive.org/web/20200830164420/https://sph.unc.edu/sph-news/gillings-school-drops-gre-requirement-for-8-graduate-degrees/	X	X
University of North Carolina--Chapel Hill	Chapel Hill, NC	2 (tie)	4.6	Health Policy	MPH	X				-	In person	https://sph.unc.edu/resource-pages/master-of-public-health/health-policy-concentration/	https://web.archive.org/web/20200830164420/https://sph.unc.edu/sph-news/gillings-school-drops-gre-requirement-for-8-graduate-degrees/	X	X					X
University of North Carolina--Chapel Hill	Chapel Hill, NC	2 (tie)	4.6	Leadership In Practice	MPH	X				-	In person	https://sph.unc.edu/resource-pages/master-of-public-health/leadership-in-practice-concentration/	https://web.archive.org/web/20200830164420/https://sph.unc.edu/sph-news/gillings-school-drops-gre-requirement-for-8-graduate-degrees/	X	X
University of North Carolina--Chapel Hill	Chapel Hill, NC	2 (tie)	4.6	Leadership In Practice	MPH	X				-	Online	https://onlinemph.unc.edu/form-mph/	https://web.archive.org/web/20200830164420/https://sph.unc.edu/sph-news/gillings-school-drops-gre-requirement-for-8-graduate-degrees/	X	X
University of North Carolina--Chapel Hill	Chapel Hill, NC	2 (tie)	4.6	Maternal, Child And Family Health	MPH	X				-	In person	https://sph.unc.edu/resource-pages/master-of-public-health/maternal-child-and-family-health-concentration/	https://web.archive.org/web/20200830164420/https://sph.unc.edu/sph-news/gillings-school-drops-gre-requirement-for-8-graduate-degrees/	X	X
University of North Carolina--Chapel Hill	Chapel Hill, NC	2 (tie)	4.6	Nutrition	MPH	X				-	In person	https://sph.unc.edu/resource-pages/master-of-public-health/nutrition-concentration/	https://web.archive.org/web/20200830164420/https://sph.unc.edu/sph-news/gillings-school-drops-gre-requirement-for-8-graduate-degrees/	X	X
University of North Carolina--Chapel Hill	Chapel Hill, NC	2 (tie)	4.6	Nutrition	MPH	X				-	Online	https://onlinemph.unc.edu/form-mph/	https://web.archive.org/web/20200830164420/https://sph.unc.edu/sph-news/gillings-school-drops-gre-requirement-for-8-graduate-degrees/	X	X
University of North Carolina--Chapel Hill	Chapel Hill, NC	2 (tie)	4.6	Nutrition With Registered Dietitian (RD) Training	MPH	X				-	In person	https://sph.unc.edu/nutr/mph-rd-program/	https://web.archive.org/web/20200830164420/https://sph.unc.edu/sph-news/gillings-school-drops-gre-requirement-for-8-graduate-degrees/	X	X
University of North Carolina--Chapel Hill	Chapel Hill, NC	2 (tie)	4.6	Nutrition With Registered Dietitian (RD) Training	MPH	X				-	Online	https://onlinemph.unc.edu/form-mph/	https://web.archive.org/web/20200830164420/https://sph.unc.edu/sph-news/gillings-school-drops-gre-requirement-for-8-graduate-degrees/	X	X
University of North Carolina--Chapel Hill	Chapel Hill, NC	2 (tie)	4.6	Place-Based Health	MPH	X				-	In person	https://sph.unc.edu/resource-pages/master-of-public-health/place-based-health-concentration/	https://web.archive.org/web/20200830164420/https://sph.unc.edu/sph-news/gillings-school-drops-gre-requirement-for-8-graduate-degrees/	X	X
University of North Carolina--Chapel Hill	Chapel Hill, NC	2 (tie)	4.6	Population Health For Clinicians	MPH	X				-	In person	https://sph.unc.edu/resource-pages/master-of-public-health/population-health-for-clinicians-concentration/	https://web.archive.org/web/20200830164420/https://sph.unc.edu/sph-news/gillings-school-drops-gre-requirement-for-8-graduate-degrees/	X	X
University of North Carolina--Chapel Hill	Chapel Hill, NC	2 (tie)	4.6	Public Health Data Science	MPH	X				-	In person	https://sph.unc.edu/resource-pages/master-of-public-health/public-health-data-science-concentration/	https://web.archive.org/web/20200830164420/https://sph.unc.edu/sph-news/gillings-school-drops-gre-requirement-for-8-graduate-degrees/	X	X
University of North Carolina--Chapel Hill	Chapel Hill, NC	2 (tie)	4.6	Biostatistics	MS				X		In person	https://sph.unc.edu/programs/?ppk=bios-ms-r		X	X		X
University of North Carolina--Chapel Hill	Chapel Hill, NC	2 (tie)	4.6	Environmental Sciences and Engineering	MS				X		In person	https://sph.unc.edu/programs/?ppk=ese-ms-r		X	X				X
University of North Carolina--Chapel Hill	Chapel Hill, NC	2 (tie)	4.6	Nutrition	MS	X				-	In person	https://sph.unc.edu/programs/?ppk=nutr-ms-r	https://web.archive.org/web/20200903203102/https://gradschool.sites.unc.edu/nutrition/	X	X
University of North Carolina--Chapel Hill	Chapel Hill, NC	2 (tie)	4.6	Epidemiology	MSCR				X		In person	https://sph.unc.edu/programs/?ppk=epid-mscr-r		X	X			X
University of North Carolina--Chapel Hill	Chapel Hill, NC	2 (tie)	4.6	Environmental Engineering	MSEE				X		In person	https://sph.unc.edu/envr/msee-program/		X	X				X
University of North Carolina--Chapel Hill	Chapel Hill, NC	2 (tie)	4.6	Environmental Sciences and Engineering	MSPH				X		In person	https://sph.unc.edu/programs/?ppk=ese-msph-r		X	X				X
University of North Carolina--Chapel Hill	Chapel Hill, NC	2 (tie)	4.6	Health Policy and Management	MSPH	X				-	In person	https://sph.unc.edu/hpm/hpm-msph/	https://web.archive.org/web/20200830164420/https://sph.unc.edu/sph-news/gillings-school-drops-gre-requirement-for-8-graduate-degrees/	X	X					X
University of North Carolina--Chapel Hill	Chapel Hill, NC	2 (tie)	4.6	Maternal and Child Health	MSPH				X		In person	https://sph.unc.edu/programs/?ppk=mch-msph-r		X	X
University of North Carolina--Chapel Hill	Chapel Hill, NC	2 (tie)	4.6	Biostatistics	PhD				X		In person	https://sph.unc.edu/programs/?ppk=bios-phd-r		X		X	X
University of North Carolina--Chapel Hill	Chapel Hill, NC	2 (tie)	4.6	Environmental Sciences and Engineering	PhD	X				-	In person	https://sph.unc.edu/programs/?ppk=ese-phd-r	https://web.archive.org/web/20200903200255/https://gradschool.sites.unc.edu/environmental-sciences-and-engineering/	X		X			X
University of North Carolina--Chapel Hill	Chapel Hill, NC	2 (tie)	4.6	Epidemiology	PhD				X		In person	https://sph.unc.edu/programs/?ppk=epid-phd-r		X		X		X
University of North Carolina--Chapel Hill	Chapel Hill, NC	2 (tie)	4.6	Health Behavior	PhD				X		In person	https://sph.unc.edu/programs/?ppk=hb-phd-r		X		X					X
University of North Carolina--Chapel Hill	Chapel Hill, NC	2 (tie)	4.6	Health Policy and Management	PhD	X				-	In person	https://sph.unc.edu/programs/?ppk=hpm-phd-r	https://web.archive.org/web/20200906135704/https://gradschool.sites.unc.edu/health-policy-and-management/	X		X				X
University of North Carolina--Chapel Hill	Chapel Hill, NC	2 (tie)	4.6	Maternal and Child Health	PhD				X		In person	https://sph.unc.edu/programs/?ppk=mch-phd-r		X		X
University of North Carolina--Chapel Hill	Chapel Hill, NC	2 (tie)	4.6	Nutrition	PhD	X				-	In person	https://sph.unc.edu/programs/?ppk=nutr-phd-r	https://web.archive.org/web/20200903203102/https://gradschool.sites.unc.edu/nutrition/	X		X
Columbia University	New York, NY	4	4.5	Biostatistics	DrPH				X		In person	https://www.publichealth.columbia.edu/become-student/degrees/doctoral-programs/drph/biostatistics		X		X	X
Columbia University	New York, NY	4	4.5	Environmental Health Sciences	DrPH				X		In person	https://www.publichealth.columbia.edu/become-student/degrees/doctoral-programs/drph/environmental-health-sciences		X		X			X
Columbia University	New York, NY	4	4.5	Epidemiology	DrPH				X		In person	https://www.publichealth.columbia.edu/become-student/degrees/doctoral-programs/drph/epidemiology		X		X		X
Columbia University	New York, NY	4	4.5	Population and Family Health	DrPH				X		In person	https://www.publichealth.columbia.edu/become-student/degrees/doctoral-programs/drph/population-and-family-health		X		X
Columbia University	New York, NY	4	4.5	Sociomedical Sciences	DrPH				X		In person	https://www.publichealth.columbia.edu/research/sms-doctoral-programs/applying-sms-drph-program		X		X					X
Columbia University	New York, NY	4	4.5	Health Administration	MHA		X	Fall 2021		optional	Hybrid, online	https://www.publichealth.columbia.edu/become-student/degrees/masters-programs/master-health-administration/executive-mha	https://archive.vn/2gy2i	X	X
Columbia University	New York, NY	4	4.5	Health Administration	MHA		X	Fall 2021		optional	In person	https://www.publichealth.columbia.edu/become-student/degrees/masters-programs/master-health-administration/full-time	https://archive.vn/2gy2i	X	X
Columbia University	New York, NY	4	4.5	Health Administration	MHA		X	Fall 2021		optional	In person (night classes)	https://www.publichealth.columbia.edu/become-student/degrees/masters-programs/master-health-administration/part-time	https://archive.vn/2gy2i	X	X
Columbia University	New York, NY	4	4.5	Biostatistics	MPH		X	Fall 2021		optional	In person	https://www.publichealth.columbia.edu/academics/degrees/master-public-health/columbia-mph/mph-biostatistics	https://archive.vn/2gy2i	X	X		X
Columbia University	New York, NY	4	4.5	Environmental Health Sciences	MPH		X	Fall 2021		optional	In person	https://www.publichealth.columbia.edu/academics/degrees/master-public-health/columbia-mph/mph-environmental-health-sciences	https://archive.vn/2gy2i	X	X				X
Columbia University	New York, NY	4	4.5	Epidemiology	MPH		X	Fall 2021		optional	In person	https://www.publichealth.columbia.edu/academics/degrees/master-public-health/columbia-mph/mph-epidemiology	https://archive.vn/2gy2i	X	X			X
Columbia University	New York, NY	4	4.5	Health Policy and Management	MPH		X	Fall 2021		optional	In person	https://www.publichealth.columbia.edu/academics/degrees/master-public-health/columbia-mph/mph-health-policy-and-management	https://archive.vn/2gy2i	X	X					X
Columbia University	New York, NY	4	4.5	Population and Family Health	MPH		X	Fall 2021		optional	In person	https://www.publichealth.columbia.edu/academics/degrees/master-public-health/columbia-mph/mph-population-and-family-health	https://archive.vn/2gy2i	X	X
Columbia University	New York, NY	4	4.5	Sociomedical Sciences	MPH		X	Fall 2021		optional	In person	https://www.publichealth.columbia.edu/academics/degrees/master-public-health/columbia-mph/mph-sociomedical-sciences	https://archive.vn/2gy2i	X	X						X
Columbia University	New York, NY	4	4.5	Clinical Research Methods	MS		X	Fall 2021		optional	In person	https://www.publichealth.columbia.edu/become-student/degrees/masters-programs/master-science/clinical-research-methods	https://archive.vn/2gy2i	X	X
Columbia University	New York, NY	4	4.5	Epidemiology	MS		X	Fall 2021		optional	Hybrid, online	https://www.publichealth.columbia.edu/become-student/degrees/masters-programs/master-science/executive-ms-epidemiology	https://archive.vn/2gy2i	X	X			X
Columbia University	New York, NY	4	4.5	Epidemiology	MS		X	Fall 2021		optional	In person	https://www.publichealth.columbia.edu/become-student/degrees/masters-programs/master-science/epidemiology	https://archive.vn/2gy2i	X	X			X
Columbia University	New York, NY	4	4.5	Patient Oriented Research	MS		X	Fall 2021		optional	In person	https://www.publichealth.columbia.edu/people/current-students/academics/degree-requirements/ms/patient-oriented-research	https://archive.vn/2gy2i	X	X
Columbia University	New York, NY	4	4.5	Pharmaceutical Statistics	MS		X	Fall 2021		optional	In person	https://www.publichealth.columbia.edu/become-student/degrees/masters-programs/master-science/pharmaceutical-statistics	https://archive.vn/2gy2i	X	X
Columbia University	New York, NY	4	4.5	Population and Family Health	MS		X	Fall 2021		optional	In person	https://www.publichealth.columbia.edu/population-and-family-health	https://archive.vn/2gy2i	X	X
Columbia University	New York, NY	4	4.5	Public Health Data Science	MS		X	Fall 2021		optional	In person	https://www.publichealth.columbia.edu/academics/degrees/master-science/public-health-data-science	https://archive.vn/2gy2i	X	X
Columbia University	New York, NY	4	4.5	Sociomedical Sciences	MS		X	Fall 2021		optional	In person	https://www.publichealth.columbia.edu/people/current-students/academics/degree-requirements/ms/sociomedical-sciences	https://archive.vn/2gy2i	X	X						X
Columbia University	New York, NY	4	4.5	Statistical Genetics	MS		X	Fall 2021		optional	In person	https://www.publichealth.columbia.edu/become-student/degrees/masters-programs/master-science/statistical-genetics	https://archive.vn/2gy2i	X	X
Columbia University	New York, NY	4	4.5	Theory and Methods	MS		X	Fall 2021		optional	In person	https://www.publichealth.columbia.edu/become-student/degrees/masters-programs/master-science/theory-methods	https://archive.vn/2gy2i	X	X
Columbia University	New York, NY	4	4.5	Toxicology	MS		X	Fall 2021		optional	In person	https://www.publichealth.columbia.edu/become-student/degrees/masters-programs/master-science/toxicology	https://archive.vn/2gy2i	X	X				X
Columbia University	New York, NY	4	4.5	Biostatistics	PhD				X		In person	https://www.publichealth.columbia.edu/become-student/degrees/doctoral-programs/phd/biostatistics		X		X	X
Columbia University	New York, NY	4	4.5	Environmental Health Sciences	PhD				X		In person	https://www.publichealth.columbia.edu/become-student/degrees/doctoral-programs/phd/environmental-health-sciences		X		X			X
Columbia University	New York, NY	4	4.5	Epidemiology	PhD				X		In person	https://www.publichealth.columbia.edu/become-student/degrees/doctoral-programs/phd/epidemiology		X		X		X
Columbia University	New York, NY	4	4.5	Sociomedical Sciences	PhD				X		In person	https://www.publichealth.columbia.edu/research/sms-doctoral-programs/applying-sms-phd		X		X					X
Emory University	Atlanta, GA	5 (tie)	4.4	Applied Epidemiology	MPH		X	Fall 2021, Fall 2020		optional	Hybrid, online	https://www.sph.emory.edu/departments/emph/tracks/applied-epidemiology/index.html	https://web.archive.org/web/20200603011518/https://sph.emory.edu/admissions/index.html	X	X			X
Emory University	Atlanta, GA	5 (tie)	4.4	Applied Public Health Informatics	MPH		X	Fall 2021, Fall 2020		optional	Hybrid, online	https://www.sph.emory.edu/departments/emph/tracks/applied-public-health-informatics/index.html	https://web.archive.org/web/20200603011518/https://sph.emory.edu/admissions/index.html	X	X
Emory University	Atlanta, GA	5 (tie)	4.4	Behavioral Sciences and Health Education	MPH		X	Fall 2021, Fall 2020		optional	In person	https://www.sph.emory.edu/academics/mph-msph/index.html	https://web.archive.org/web/20200603011518/https://sph.emory.edu/admissions/index.html	X	X						X
Emory University	Atlanta, GA	5 (tie)	4.4	Biostatistics	MPH		X	Fall 2021, Fall 2020		optional	In person	https://www.sph.emory.edu/academics/mph-msph/index.html	https://web.archive.org/web/20200603011518/https://sph.emory.edu/admissions/index.html	X	X		X
Emory University	Atlanta, GA	5 (tie)	4.4	Environmental Health	MPH		X	Fall 2021, Fall 2020		optional	In person	https://www.sph.emory.edu/academics/mph-msph/index.html	https://web.archive.org/web/20200603011518/https://sph.emory.edu/admissions/index.html	X	X				X
Emory University	Atlanta, GA	5 (tie)	4.4	Epidemiology	MPH		X	Fall 2021, Fall 2020		optional	In person	https://www.sph.emory.edu/academics/mph-msph/index.html	https://web.archive.org/web/20200603011518/https://sph.emory.edu/admissions/index.html	X	X			X
Emory University	Atlanta, GA	5 (tie)	4.4	Global Environmental Health	MPH		X	Fall 2021, Fall 2020		optional	In person	https://www.sph.emory.edu/academics/mph-msph/index.html	https://web.archive.org/web/20200603011518/https://sph.emory.edu/admissions/index.html	X	X				X
Emory University	Atlanta, GA	5 (tie)	4.4	Global Epidemiology	MPH		X	Fall 2021, Fall 2020		optional	In person	https://www.sph.emory.edu/academics/mph-msph/index.html	https://web.archive.org/web/20200603011518/https://sph.emory.edu/admissions/index.html	X	X			X
Emory University	Atlanta, GA	5 (tie)	4.4	Global Health	MPH		X	Fall 2021, Fall 2020		optional	In person	https://www.sph.emory.edu/academics/mph-msph/index.html	https://web.archive.org/web/20200603011518/https://sph.emory.edu/admissions/index.html	X	X
Emory University	Atlanta, GA	5 (tie)	4.4	Health Care Management	MPH		X	Fall 2021, Fall 2020		optional	In person	https://www.sph.emory.edu/academics/mph-msph/index.html	https://web.archive.org/web/20200603011518/https://sph.emory.edu/admissions/index.html	X	X					X
Emory University	Atlanta, GA	5 (tie)	4.4	Health Policy	MPH		X	Fall 2021, Fall 2020		optional	In person	https://www.sph.emory.edu/academics/mph-msph/index.html	https://web.archive.org/web/20200603011518/https://sph.emory.edu/admissions/index.html	X	X					X
Emory University	Atlanta, GA	5 (tie)	4.4	Health Policy and Health Services Research	MPH		X	Fall 2021, Fall 2020		optional	In person	https://www.sph.emory.edu/academics/mph-msph/index.html	https://web.archive.org/web/20200603011518/https://sph.emory.edu/admissions/index.html	X	X					X
Emory University	Atlanta, GA	5 (tie)	4.4	Prevention Science	MPH		X	Fall 2021, Fall 2020		optional	Hybrid, online	https://www.sph.emory.edu/departments/emph/tracks/prevention-science/index.html	https://web.archive.org/web/20200603011518/https://sph.emory.edu/admissions/index.html	X	X
Emory University	Atlanta, GA	5 (tie)	4.4	Biostatistics	MSPH		X	Fall 2021, Fall 2020		optional	In person	https://www.sph.emory.edu/academics/mph-msph/index.html	https://web.archive.org/web/20200603011518/https://sph.emory.edu/admissions/index.html	X	X		X
Emory University	Atlanta, GA	5 (tie)	4.4	Environmental Health and Epidemiology	MSPH		X	Fall 2021, Fall 2020		optional	In person	https://www.sph.emory.edu/academics/mph-msph/index.html	https://web.archive.org/web/20200603011518/https://sph.emory.edu/admissions/index.html	X	X			X	X
Emory University	Atlanta, GA	5 (tie)	4.4	Epidemiology	MSPH		X	Fall 2021, Fall 2020		optional	In person	https://www.sph.emory.edu/academics/mph-msph/index.html	https://web.archive.org/web/20200603011518/https://sph.emory.edu/admissions/index.html	X	X			X
Emory University	Atlanta, GA	5 (tie)	4.4	Global Epidemiology	MSPH		X	Fall 2021, Fall 2020		optional	In person	https://www.sph.emory.edu/academics/mph-msph/index.html	https://web.archive.org/web/20200603011518/https://sph.emory.edu/admissions/index.html	X	X			X
Emory University	Atlanta, GA	5 (tie)	4.4	Behavioral, Social, and Health Education Sciences	PhD				X		In person	https://www.sph.emory.edu/departments/bshe/programs/phd/index.html		X		X					X
Emory University	Atlanta, GA	5 (tie)	4.4	Biostatistics	PhD				X		In person	https://www.sph.emory.edu/departments/bios/degree-programs/phd/index.html		X		X	X
Emory University	Atlanta, GA	5 (tie)	4.4	Environmental Health Sciences	PhD				X		In person	https://www.sph.emory.edu/departments/eh/degree-programs/phd/index.html		X		X			X
Emory University	Atlanta, GA	5 (tie)	4.4	Epidemiology	PhD				X		In person	https://www.sph.emory.edu/departments/epi/degree-programs/phd/index.html		X		X		X
Emory University	Atlanta, GA	5 (tie)	4.4	Global Health and Development	PhD				X		In person	https://www.sph.emory.edu/departments/gh/degree-programs/phd/index.html		X		X
Emory University	Atlanta, GA	5 (tie)	4.4	Health Services Research and Health Policy	PhD				X		In person	https://www.sph.emory.edu/departments/hpm/degree-programs/phd/index.html		X		X				X
Emory University	Atlanta, GA	5 (tie)	4.4	Nutrition and Health Sciences	PhD				X		In person	http://nutrition.emory.edu/academics/index.html		X		X
University of Michigan--Ann Arbor	Ann Arbor, MI	5 (tie)	4.4	Health Informatics	MHI		X	Fall 2021		-	In person	https://www.si.umich.edu/programs/master-health-informatics	https://web.archive.org/web/20200823210911/https://sph.umich.edu/admissions-aid/applications-deadlines.html	X	X
University of Michigan--Ann Arbor	Ann Arbor, MI	5 (tie)	4.4	Health Services Administration	MHSA		X	Fall 2021		-	In person	https://sph.umich.edu/hmp/programs/mhsa.html	https://web.archive.org/web/20200823210911/https://sph.umich.edu/admissions-aid/applications-deadlines.html	X	X					X
University of Michigan--Ann Arbor	Ann Arbor, MI	5 (tie)	4.4	Biostatistics	MPH		X	Fall 2021		-	In person	https://sph.umich.edu/biostat/programs/masters.html	https://web.archive.org/web/20200823210911/https://sph.umich.edu/admissions-aid/applications-deadlines.html	X	X		X
University of Michigan--Ann Arbor	Ann Arbor, MI	5 (tie)	4.4	Environmental Health Promotion and Policy	MPH		X	Fall 2021		-	In person	https://sph.umich.edu/ehs/programs/ehpp.html	https://web.archive.org/web/20200823210911/https://sph.umich.edu/admissions-aid/applications-deadlines.html	X	X				X	X
University of Michigan--Ann Arbor	Ann Arbor, MI	5 (tie)	4.4	Environmental Health Sciences	MPH		X	Fall 2021		-	In person	https://sph.umich.edu/ehs/programs/ehs_mph.html	https://web.archive.org/web/20200823210911/https://sph.umich.edu/admissions-aid/applications-deadlines.html	X	X				X
University of Michigan--Ann Arbor	Ann Arbor, MI	5 (tie)	4.4	Epidemiology	MPH		X	Fall 2021		-	In person	https://sph.umich.edu/epid/programs/mph.html	https://web.archive.org/web/20200823210911/https://sph.umich.edu/admissions-aid/applications-deadlines.html	X	X			X
University of Michigan--Ann Arbor	Ann Arbor, MI	5 (tie)	4.4	Health Behavior and Health Education	MPH		X	Fall 2021		-	In person	https://sph.umich.edu/hbhe/programs/mph.html	https://web.archive.org/web/20200823210911/https://sph.umich.edu/admissions-aid/applications-deadlines.html	X	X						X
University of Michigan--Ann Arbor	Ann Arbor, MI	5 (tie)	4.4	Health Management and Policy	MPH		X	Fall 2021		-	In person	https://sph.umich.edu/hmp/programs/mph.html	https://web.archive.org/web/20200823210911/https://sph.umich.edu/admissions-aid/applications-deadlines.html	X	X					X
University of Michigan--Ann Arbor	Ann Arbor, MI	5 (tie)	4.4	Nutritional Sciences	MPH		X	Fall 2021		-	In person	https://sph.umich.edu/ns/programs/mph.html	https://web.archive.org/web/20200823210911/https://sph.umich.edu/admissions-aid/applications-deadlines.html	X	X
University of Michigan--Ann Arbor	Ann Arbor, MI	5 (tie)	4.4	Population and Health Sciences	MPH		X	Fall 2021		-	Online	https://sph.umich.edu/online/index.html	https://web.archive.org/web/20200823210911/https://sph.umich.edu/admissions-aid/applications-deadlines.html	X	X
University of Michigan--Ann Arbor	Ann Arbor, MI	5 (tie)	4.4	Biostatistics	MS		X	Fall 2021		-	In person	https://sph.umich.edu/biostat/programs/masters.html	https://web.archive.org/web/20200823210911/https://sph.umich.edu/admissions-aid/applications-deadlines.html	X	X		X
University of Michigan--Ann Arbor	Ann Arbor, MI	5 (tie)	4.4	Clinical Research	MS		X	Fall 2021		-	In person	https://sph.umich.edu/epid/programs/ms.html	https://web.archive.org/web/20200823210911/https://sph.umich.edu/admissions-aid/applications-deadlines.html	X	X
University of Michigan--Ann Arbor	Ann Arbor, MI	5 (tie)	4.4	Environmental Health Sciences	MS		X	Fall 2021		-	In person	https://sph.umich.edu/ehs/programs/ms.html	https://web.archive.org/web/20200823210911/https://sph.umich.edu/admissions-aid/applications-deadlines.html	X	X				X
University of Michigan--Ann Arbor	Ann Arbor, MI	5 (tie)	4.4	Nutritional Sciences	MS		X	Fall 2021		-	In person	https://sph.umich.edu/ns/programs/ms.html	https://web.archive.org/web/20200823210911/https://sph.umich.edu/admissions-aid/applications-deadlines.html	X	X
University of Michigan--Ann Arbor	Ann Arbor, MI	5 (tie)	4.4	Population and Health Sciences	MS		X	Fall 2021		-	Online	https://sph.umich.edu/online/index.html	https://web.archive.org/web/20200823210911/https://sph.umich.edu/admissions-aid/applications-deadlines.html	X	X
University of Michigan--Ann Arbor	Ann Arbor, MI	5 (tie)	4.4	Toxicology	MS		X	Fall 2021		-	In person	https://sph.umich.edu/ehs/programs/toxicology.html	https://web.archive.org/web/20200823210911/https://sph.umich.edu/admissions-aid/applications-deadlines.html	X	X				X
University of Michigan--Ann Arbor	Ann Arbor, MI	5 (tie)	4.4	Biostatistics	PhD		X	Fall 2021		-	In person	https://sph.umich.edu/biostat/programs/phd.html	https://web.archive.org/web/20200823210911/https://sph.umich.edu/admissions-aid/applications-deadlines.html	X		X	X
University of Michigan--Ann Arbor	Ann Arbor, MI	5 (tie)	4.4	Environmental Health Sciences	PhD		X	Fall 2021		-	In person	https://sph.umich.edu/ehs/programs/phd.html	https://web.archive.org/web/20200823210911/https://sph.umich.edu/admissions-aid/applications-deadlines.html	X		X			X
University of Michigan--Ann Arbor	Ann Arbor, MI	5 (tie)	4.4	Epidemiology	PhD		X	Fall 2021		-	In person	https://sph.umich.edu/epid/programs/phd.html	https://web.archive.org/web/20200823210911/https://sph.umich.edu/admissions-aid/applications-deadlines.html	X		X		X
University of Michigan--Ann Arbor	Ann Arbor, MI	5 (tie)	4.4	Health Behavior and Health Education	PhD		X	Fall 2021		-	In person	https://sph.umich.edu/hbhe/programs/phd.html	https://web.archive.org/web/20200823210911/https://sph.umich.edu/admissions-aid/applications-deadlines.html	X		X					X
University of Michigan--Ann Arbor	Ann Arbor, MI	5 (tie)	4.4	Health Management and Policy	PhD		X	Fall 2021		-	In person	https://sph.umich.edu/hmp/programs/phd.html	https://web.archive.org/web/20200823210911/https://sph.umich.edu/admissions-aid/applications-deadlines.html	X		X				X
University of Michigan--Ann Arbor	Ann Arbor, MI	5 (tie)	4.4	Nutritional Sciences	PhD		X	Fall 2021		-	In person	https://sph.umich.edu/ns/programs/phd.html	https://web.archive.org/web/20200823210911/https://sph.umich.edu/admissions-aid/applications-deadlines.html	X		X
University of Washington	Seattle, WA	7	4.2	Global Health	DrGH		X	Fall 2021		optional?	In person	https://globalhealth.washington.edu/education-training/drgh	https://archive.vn/YUHvZ	X		X
University of Washington	Seattle, WA	7	4.2	Health Administration	MHA	X				-	Hybrid	https://www.executivemha.uw.edu/	https://web.archive.org/web/20200830165301/https://www.mha.uw.edu/admissions/admissions-faqs/	X	X
University of Washington	Seattle, WA	7	4.2	Health Administration	MHA	X				-	In person	https://sph.washington.edu/program/master-health-administration	https://web.archive.org/web/20200830165301/https://www.mha.uw.edu/admissions/admissions-faqs/	X	X
University of Washington	Seattle, WA	7	4.2	Health Informatics and Health Information Management	MHIHIM	X				-	In person	https://www.health-informatics.uw.edu/	https://archive.vn/j41NL , https://web.archive.org/web/20200830170002/https://www.health-informatics.uw.edu/admissions/	X	X
University of Washington	Seattle, WA	7	4.2	Community-Oriented Public Health Practice	MPH	X				-	In person	https://www.mphpublichealthpractice.uw.edu/	https://archive.vn/ypkmd	X	X						X
University of Washington	Seattle, WA	7	4.2	Environmental and Occupational Health	MPH		X	Fall 2021		optional	In person	https://deohs.washington.edu/how-apply	https://web.archive.org/web/20200823230045/https://deohs.washington.edu/how-apply	X	X				X
University of Washington	Seattle, WA	7	4.2	Epidemiology	MPH	X				-	In person	https://epi.washington.edu/application-instructions	https://web.archive.org/web/20200918231648/https://epi.washington.edu/application-instructions , https://web.archive.org/web/20200823230307/https://epi.washington.edu/application-instructions , https://web.archive.org/web/20200617022143/https://epi.washington.edu/application-instructions	X	X			X
University of Washington	Seattle, WA	7	4.2	Epidemiology: Global Health	MPH	X				-	In person	https://sph.washington.edu/program/mph-epidemiology-global-health-track	https://web.archive.org/web/20200918231648/https://epi.washington.edu/application-instructions , https://web.archive.org/web/20200823230307/https://epi.washington.edu/application-instructions , https://web.archive.org/web/20200617022143/https://epi.washington.edu/application-instructions	X	X			X
University of Washington	Seattle, WA	7	4.2	Epidemiology: Maternal and Child Health	MPH	X				-	In person	https://sph.washington.edu/program/mph-epidemiology-maternal-and-child-health-track	https://web.archive.org/web/20200918231648/https://epi.washington.edu/application-instructions , https://web.archive.org/web/20200823230307/https://epi.washington.edu/application-instructions , https://web.archive.org/web/20200617022143/https://epi.washington.edu/application-instructions	X	X			X
University of Washington	Seattle, WA	7	4.2	Global Health	MPH	X				-	In person	https://globalhealth.washington.edu/education-training/master-public-health	https://web.archive.org/web/20200830170231/https://globalhealth.washington.edu/education-training/master-public-health/minimum-qualifications	X	X
University of Washington	Seattle, WA	7	4.2	Global Health: Health Metrics and Evaluation	MPH		X	Fall 2021		optional?	In person	https://sph.washington.edu/program/mph-global-health-health-metrics-and-evaluation	https://web.archive.org/web/20200830170231/https://globalhealth.washington.edu/education-training/master-public-health/minimum-qualifications	X	X
University of Washington	Seattle, WA	7	4.2	Health Services	MPH	X				-	Hybrid	https://www.executivemph.uw.edu/	https://archive.vn/6VR3D , https://web.archive.org/web/20200830171037/https://www.executivemph.uw.edu/admissions/	X	X					X
University of Washington	Seattle, WA	7	4.2	Health Services	MPH	X				optional	In person	https://depts.washington.edu/hservmph/apply	https://web.archive.org/web/20200830170715/https://depts.washington.edu/hservmph/apply	X	X					X
University of Washington	Seattle, WA	7	4.2	Health Services: Health Systems and Policy	MPH	X				optional	In person	https://sph.washington.edu/program/mph-health-services-health-systems-and-policy-concentration	https://web.archive.org/web/20200830170715/https://depts.washington.edu/hservmph/apply	X	X					X
University of Washington	Seattle, WA	7	4.2	Health Services: Social and Behavioral Sciences	MPH	X				optional	In person	https://sph.washington.edu/program/mph-health-services-social-behavioral-sciences-concentration	https://web.archive.org/web/20200830170715/https://depts.washington.edu/hservmph/apply	X	X					X
University of Washington	Seattle, WA	7	4.2	Nutritional Sciences	MPH		X	Fall 2021		optional	In person	https://sph.washington.edu/program/mph-nutritional-sciences	https://web.archive.org/web/20200914000813/https://nutr.uw.edu/graduate/apply/	X	X
University of Washington	Seattle, WA	7	4.2	Occupational and Environmental Medicine	MPH		X	Fall 2021		optional	In person	https://deohs.washington.edu/how-apply	https://web.archive.org/web/20200823230045/https://deohs.washington.edu/how-apply	X	X				X
University of Washington	Seattle, WA	7	4.2	One Health	MPH		X	Fall 2021		optional	In person	https://deohs.washington.edu/how-apply	https://web.archive.org/web/20200823230045/https://deohs.washington.edu/how-apply	X	X
University of Washington	Seattle, WA	7	4.2	Public Health Genetics	MPH	X				-	In person	http://iphg.biostat.washington.edu/programs/mph	https://web.archive.org/web/20200830171201/http://iphg.biostat.washington.edu/prospective-students	X	X
University of Washington	Seattle, WA	7	4.2	Biostatistics	MS		X	Fall 2021		optional?	In person	https://www.biostat.washington.edu/academics/ms	https://web.archive.org/web/20200826200407/https://www.biostat.washington.edu/apply/requirements	X	X		X
University of Washington	Seattle, WA	7	4.2	Environmental Health	MS		X	Fall 2021		optional	In person	https://deohs.washington.edu/how-apply	https://web.archive.org/web/20200823230045/https://deohs.washington.edu/how-apply	X	X				X
University of Washington	Seattle, WA	7	4.2	Environmental Toxicology/Applied Toxicology	MS		X	Fall 2021		optional	In person	https://deohs.washington.edu/how-apply	https://web.archive.org/web/20200823230045/https://deohs.washington.edu/how-apply	X	X				X
University of Washington	Seattle, WA	7	4.2	Epidemiology	MS	X				-	In person	https://epi.washington.edu/application-instructions	https://web.archive.org/web/20200918231648/https://epi.washington.edu/application-instructions , https://web.archive.org/web/20200823230307/https://epi.washington.edu/application-instructions , https://web.archive.org/web/20200617022143/https://epi.washington.edu/application-instructions	X	X			X
University of Washington	Seattle, WA	7	4.2	Exposure Science or Occupational Hygiene	MS		X	Fall 2021		optional	In person	https://deohs.washington.edu/how-apply	https://web.archive.org/web/20200823230045/https://deohs.washington.edu/how-apply	X	X				X
University of Washington	Seattle, WA	7	4.2	Genetic Epidemiology	MS	X				-	In person	http://iphg.biostat.washington.edu/programs/ms	https://web.archive.org/web/20200830171201/http://iphg.biostat.washington.edu/prospective-students	X	X			X
University of Washington	Seattle, WA	7	4.2	Health Services	MS				X		In person	https://sph.washington.edu/program/ms-health-services		X	X					X
University of Washington	Seattle, WA	7	4.2	Nutritional Sciences	MS		X	Fall 2021		optional	In person	https://sph.washington.edu/program/ms-nutritional-sciences	https://web.archive.org/web/20200914000813/https://nutr.uw.edu/graduate/apply/	X	X
University of Washington	Seattle, WA	7	4.2	Biostatistics	PhD		X	Fall 2021		optional?	In person	https://www.biostat.washington.edu/academics/phd	https://web.archive.org/web/20200826200407/https://www.biostat.washington.edu/apply/requirements	X		X	X
University of Washington	Seattle, WA	7	4.2	Environmental and Occupational Hygiene	PhD		X	Fall 2021		optional	In person	https://deohs.washington.edu/how-apply	https://web.archive.org/web/20200823230045/https://deohs.washington.edu/how-apply	X		X			X
University of Washington	Seattle, WA	7	4.2	Environmental Toxicology	PhD		X	Fall 2021		optional	In person	https://deohs.washington.edu/how-apply	https://web.archive.org/web/20200823230045/https://deohs.washington.edu/how-apply	X		X			X
University of Washington	Seattle, WA	7	4.2	Epidemiology	PhD	X				-	In person	https://epi.washington.edu/application-instructions	https://web.archive.org/web/20200918231648/https://epi.washington.edu/application-instructions , https://web.archive.org/web/20200823230307/https://epi.washington.edu/application-instructions , https://web.archive.org/web/20200617022143/https://epi.washington.edu/application-instructions	X		X		X
University of Washington	Seattle, WA	7	4.2	Global Health: Implementation Science	PhD		X	Fall 2021		optional?	In person	https://globalhealth.washington.edu/education-training/phd-gh	https://web.archive.org/web/20200826201607/https://globalhealth.washington.edu/education-training/phd-gh	X		X
University of Washington	Seattle, WA	7	4.2	Global Health: Metrics	PhD		X	Fall 2021		optional?	In person	https://globalhealth.washington.edu/education-training/phd-gh	https://web.archive.org/web/20200826201607/https://globalhealth.washington.edu/education-training/phd-gh	X		X
University of Washington	Seattle, WA	7	4.2	Health Services	PhD		X	Fall 2021		optional?	In person	https://depts.washington.edu/hservphd/apply	https://archive.vn/ptYBv	X		X				X
University of Washington	Seattle, WA	7	4.2	Nutritional Sciences	PhD		X	Fall 2021		optional	In person	https://sph.washington.edu/program/phd-nutritional-sciences	https://web.archive.org/web/20200914000813/https://nutr.uw.edu/graduate/apply/	X		X					X
University of Washington	Seattle, WA	7	4.2	Pathobiology	PhD		X	Fall 2021		optional?	In person	https://globalhealth.washington.edu/phd-pathobiology	https://archive.vn/tsBUs	X		X
University of Washington	Seattle, WA	7	4.2	Public Health Genetics	PhD	X				-	In person	http://iphg.biostat.washington.edu/programs/phd	https://web.archive.org/web/20200830171201/http://iphg.biostat.washington.edu/prospective-students	X		X
Boston University	Boston, MA	8	4.1	Public Health	DrPH	X				-	In person	https://www.bu.edu/sph/education/degrees-and-programs/doctor-of-public-health-drph/	https://web.archive.org/web/20200827184337/https://www.bu.edu/sph/admissions/applying/programs/doctor-of-public-health-drph/	X		X
Boston University	Boston, MA	8	4.1	Community Assessment, Program Design, Implementation, and Evaluation	MPH	X				-	In person	https://www.bu.edu/sph/education/degrees-and-programs/master-of-public-health-programs/certificates/	https://web.archive.org/web/20200827183741/https://www.bu.edu/sph/announcement/rethinking-our-student-admission-requirements-a-case-for-equity/	X	X						X
Boston University	Boston, MA	8	4.1	Environmental Health	MPH	X				-	In person	https://www.bu.edu/sph/education/degrees-and-programs/master-of-public-health-programs/certificates/	https://web.archive.org/web/20200827183741/https://www.bu.edu/sph/announcement/rethinking-our-student-admission-requirements-a-case-for-equity/	X	X				X
Boston University	Boston, MA	8	4.1	Epidemiology and Biostatistics	MPH	X				-	In person	https://www.bu.edu/sph/education/degrees-and-programs/master-of-public-health-programs/certificates/	https://web.archive.org/web/20200827183741/https://www.bu.edu/sph/announcement/rethinking-our-student-admission-requirements-a-case-for-equity/	X	X		X	X
Boston University	Boston, MA	8	4.1	Global Health Program Design, Monitoring, and Evaluation	MPH	X				-	In person	https://www.bu.edu/sph/education/degrees-and-programs/master-of-public-health-programs/certificates/	https://web.archive.org/web/20200827183741/https://www.bu.edu/sph/announcement/rethinking-our-student-admission-requirements-a-case-for-equity/	X	X					X
Boston University	Boston, MA	8	4.1	Health Communication and Promotion	MPH	X				-	In person	https://www.bu.edu/sph/education/degrees-and-programs/master-of-public-health-programs/certificates/	https://web.archive.org/web/20200827183741/https://www.bu.edu/sph/announcement/rethinking-our-student-admission-requirements-a-case-for-equity/	X	X						X
Boston University	Boston, MA	8	4.1	Health Policy and Law	MPH	X				-	In person	https://www.bu.edu/sph/education/degrees-and-programs/master-of-public-health-programs/certificates/	https://web.archive.org/web/20200827183741/https://www.bu.edu/sph/announcement/rethinking-our-student-admission-requirements-a-case-for-equity/	X	X					X
Boston University	Boston, MA	8	4.1	Healthcare Management	MPH	X				-	In person	https://www.bu.edu/sph/education/degrees-and-programs/master-of-public-health-programs/certificates/	https://web.archive.org/web/20200827183741/https://www.bu.edu/sph/announcement/rethinking-our-student-admission-requirements-a-case-for-equity/	X	X					X
Boston University	Boston, MA	8	4.1	Program Management	MPH	X				-	In person	https://www.bu.edu/sph/education/degrees-and-programs/master-of-public-health-programs/certificates/	https://web.archive.org/web/20200827183741/https://www.bu.edu/sph/announcement/rethinking-our-student-admission-requirements-a-case-for-equity/	X	X
Boston University	Boston, MA	8	4.1	Public Health	MPH	X				-	Online	https://www.bu.edu/sph/education/degrees-and-programs/executive-master-of-public-health-mph/	https://web.archive.org/web/20200827183741/https://www.bu.edu/sph/announcement/rethinking-our-student-admission-requirements-a-case-for-equity/	X	X
Boston University	Boston, MA	8	4.1	Applied Biostatistics	MS	X				-	In person	https://www.bu.edu/sph/education/degrees-and-programs/ma-ms-programs/ms-biostats/	https://web.archive.org/web/20200827183741/https://www.bu.edu/sph/announcement/rethinking-our-student-admission-requirements-a-case-for-equity/	X	X		X
Boston University	Boston, MA	8	4.1	Biostatistics	MS		X	Fall 2021		optional	In person	https://www.bu.edu/sph/education/degrees-and-programs/ma-ms-programs/master-of-arts-ma-in-biostatistics/	https://web.archive.org/web/20200823181440/https://www.bu.edu/sph/education/degrees-and-programs/ma-ms-programs/master-of-arts-ma-in-biostatistics/	X	X		X
Boston University	Boston, MA	8	4.1	Population Health Research	MS	X				-	In person	https://www.bu.edu/sph/education/degrees-and-programs/ma-ms-programs/master-of-science-in-population-health-research-custom/	https://web.archive.org/web/20200827183741/https://www.bu.edu/sph/announcement/rethinking-our-student-admission-requirements-a-case-for-equity/	X	X
Boston University	Boston, MA	8	4.1	Population Health Research: Climate and Health	MS	X				-	In person	https://www.bu.edu/sph/education/degrees-and-programs/ma-ms-programs/master-of-science-in-population-health-research-climate-and-health/	https://web.archive.org/web/20200827183741/https://www.bu.edu/sph/announcement/rethinking-our-student-admission-requirements-a-case-for-equity/	X	X
Boston University	Boston, MA	8	4.1	Population Health Research: Epidemiology	MS	X				-	In person	https://www.bu.edu/sph/education/degrees-and-programs/ma-ms-programs/master-of-science-in-population-health-research-epidemiology/	https://web.archive.org/web/20200827183741/https://www.bu.edu/sph/announcement/rethinking-our-student-admission-requirements-a-case-for-equity/	X	X			X
Boston University	Boston, MA	8	4.1	Population Health Research: Global Health	MS	X				-	In person	https://www.bu.edu/sph/education/degrees-and-programs/ma-ms-programs/master-of-science-in-population-health-research-global-health/	https://web.archive.org/web/20200827183741/https://www.bu.edu/sph/announcement/rethinking-our-student-admission-requirements-a-case-for-equity/	X	X
Boston University	Boston, MA	8	4.1	Population Health Research: Public Health Data Science	MS	X				-	In person	https://www.bu.edu/sph/education/degrees-and-programs/ma-ms-programs/master-of-science-in-population-health-research-public-health-data-science/	https://web.archive.org/web/20200827183741/https://www.bu.edu/sph/announcement/rethinking-our-student-admission-requirements-a-case-for-equity/	X	X
Boston University	Boston, MA	8	4.1	Population Health Research: Translation and Implementation Science	MS	X				-	In person	https://www.bu.edu/sph/education/degrees-and-programs/ma-ms-programs/master-of-science-in-population-health-research-translation-and-implementation-science/	https://web.archive.org/web/20200827183741/https://www.bu.edu/sph/announcement/rethinking-our-student-admission-requirements-a-case-for-equity/	X	X
Boston University	Boston, MA	8	4.1	Biostatistics	PhD		X	Fall 2021		optional	In person	https://www.bu.edu/sph/education/degrees-and-programs/doctor-of-philosophy-phd/biostatistics-phd-program/	https://web.archive.org/web/20200823181612/https://www.bu.edu/sph/education/degrees-and-programs/doctor-of-philosophy-phd/biostatistics-phd-program/	X		X	X
Boston University	Boston, MA	8	4.1	Environmental Health	PhD	X				-	In person	https://www.bu.edu/sph/education/degrees-and-programs/doctor-of-philosophy-phd/doctor-of-philosophy-in-environmental-health/	https://web.archive.org/web/20200827183741/https://www.bu.edu/sph/announcement/rethinking-our-student-admission-requirements-a-case-for-equity/	X		X			X
Boston University	Boston, MA	8	4.1	Epidemiology	PhD	X				-	In person	https://www.bu.edu/sph/education/degrees-and-programs/doctor-of-philosophy-phd/doctor-of-philosophy-in-epidemiology/	https://web.archive.org/web/20200827183741/https://www.bu.edu/sph/announcement/rethinking-our-student-admission-requirements-a-case-for-equity/	X		X		X
Boston University	Boston, MA	8	4.1	Health Services Research	PhD	X				-	In person	https://www.bu.edu/sph/education/degrees-and-programs/doctor-of-philosophy-phd/doctor-of-philosophy-in-health-services-research/	https://web.archive.org/web/20200827183741/https://www.bu.edu/sph/announcement/rethinking-our-student-admission-requirements-a-case-for-equity/	X		X				X
University of California--Berkeley	Berkeley, CA	9 (tie)	4	Public Health	DrPH		X	Fall 2021		optional	In person	https://publichealth.berkeley.edu/academics/interdisciplinary/doctor-of-public-health-drph/	https://archive.vn/ZC7xU , https://archive.vn/CbyYD	X		X
University of California--Berkeley	Berkeley, CA	9 (tie)	4	Biostatistics	MA				X		In person	https://publichealth.berkeley.edu/academics/biostatistics/biostatistics-ma/		X	X		X
University of California--Berkeley	Berkeley, CA	9 (tie)	4	Environmental Health Sciences	MPH		X	Fall 2021		optional	In person	https://publichealth.berkeley.edu/academics/environmental-health-sciences/environmental-health-sciences-mph/	https://archive.vn/ZC7xU , https://archive.vn/CbyYD	X	X				X
University of California--Berkeley	Berkeley, CA	9 (tie)	4	Epidemiology	MPH		X	Fall 2021		optional	In person	https://publichealth.berkeley.edu/academics/epidemiology-and-biostatistics/epidemiology-mph/	https://archive.vn/ZC7xU , https://archive.vn/CbyYD	X	X			X
University of California--Berkeley	Berkeley, CA	9 (tie)	4	Epidemiology and Biostatistics	MPH		X	Fall 2021		optional	In person	https://publichealth.berkeley.edu/academics/epidemiology-and-biostatistics/epidemiology-biostatistics-mph/	https://archive.vn/ZC7xU , https://archive.vn/CbyYD	X	X		X	X
University of California--Berkeley	Berkeley, CA	9 (tie)	4	Epidemiology and Biostatistics	MPH		X	Fall 2021, Fall 2020		optional	Online	https://publichealth.berkeley.edu/admissions/online-program/requirements/ , https://drive.google.com/file/d/1TNxajDxcsoiTy_mHlMmf5e6jbiacAKtS/view	https://archive.vn/ZC7xU , https://archive.vn/CbyYD , https://archive.vn/lZmhc	X	X		X	X
University of California--Berkeley	Berkeley, CA	9 (tie)	4	Global Health and Environment	MPH		X	Fall 2021		optional	In person	https://publichealth.berkeley.edu/academics/environmental-health-sciences/global-health-and-environment-mph/	https://archive.vn/ZC7xU , https://archive.vn/CbyYD	X	X				X
University of California--Berkeley	Berkeley, CA	9 (tie)	4	Health and Social Behavior	MPH		X	Fall 2021		optional	In person	https://publichealth.berkeley.edu/academics/community-health-sciences/health-and-social-behavior-mph/	https://archive.vn/ZC7xU , https://archive.vn/CbyYD	X	X						X
University of California--Berkeley	Berkeley, CA	9 (tie)	4	Health Policy and Management	MPH		X	Fall 2021		optional	In person	https://publichealth.berkeley.edu/academics/health-policy-and-management/health-policy-and-management-2-year-mph/	https://archive.vn/ZC7xU , https://archive.vn/CbyYD	X	X					X
University of California--Berkeley	Berkeley, CA	9 (tie)	4	Health Policy and Management	MPH		X	Fall 2021, Fall 2020		optional	Online	https://publichealth.berkeley.edu/admissions/online-program/requirements/ , https://drive.google.com/file/d/1TNxajDxcsoiTy_mHlMmf5e6jbiacAKtS/view	https://archive.vn/ZC7xU , https://archive.vn/CbyYD , https://archive.vn/lZmhc	X	X					X
University of California--Berkeley	Berkeley, CA	9 (tie)	4	Infectious Diseases and Vaccinology	MPH		X	Fall 2021		optional	In person	https://publichealth.berkeley.edu/academics/infectious-diseases-and-vaccinology/infectious-diseases-and-vaccinology-mph/	https://archive.vn/ZC7xU , https://archive.vn/CbyYD	X	X
University of California--Berkeley	Berkeley, CA	9 (tie)	4	Interdisciplinary	MPH		X	Fall 2021		optional	In person	https://publichealth.berkeley.edu/academics/interdisciplinary/interdisciplinary-mph/	https://archive.vn/ZC7xU , https://archive.vn/CbyYD	X	X
University of California--Berkeley	Berkeley, CA	9 (tie)	4	Maternal, Child and Adolescent Health	MPH		X	Fall 2021		optional	In person	https://publichealth.berkeley.edu/academics/community-health-sciences/maternal-child-and-adolescent-health-2-year-mph/	https://archive.vn/ZC7xU , https://archive.vn/CbyYD	X	X
University of California--Berkeley	Berkeley, CA	9 (tie)	4	Public Health Nutrition	MPH		X	Fall 2021		optional	In person	https://publichealth.berkeley.edu/academics/community-health-sciences/public-health-nutrition-2-year-mph/	https://archive.vn/ZC7xU , https://archive.vn/CbyYD	X	X
University of California--Berkeley	Berkeley, CA	9 (tie)	4	Environmental Health Sciences	MS		X	Fall 2021		optional	In person	https://publichealth.berkeley.edu/academics/environmental-health-sciences/environmental-health-sciences-ms/	https://archive.vn/ZC7xU	X	X				X
University of California--Berkeley	Berkeley, CA	9 (tie)	4	Epidemiology	MS				X		In person	https://publichealth.berkeley.edu/academics/epidemiology/epidemiology-ms/		X	X			X
University of California--Berkeley	Berkeley, CA	9 (tie)	4	Global Health and Environment	MS		X	Fall 2021		optional	In person	https://publichealth.berkeley.edu/academics/environmental-health-sciences/global-health-and-environment-ms/	https://archive.vn/ZC7xU	X	X				X
University of California--Berkeley	Berkeley, CA	9 (tie)	4	Biostatistics	PhD				X		In person	https://publichealth.berkeley.edu/academics/biostatistics/biostatistics-phd/		X		X	X
University of California--Berkeley	Berkeley, CA	9 (tie)	4	Environmental Health Sciences	PhD		X	Fall 2021		optional	In person	https://publichealth.berkeley.edu/academics/environmental-health-sciences/environmental-health-sciences-phd/	https://archive.vn/ZC7xU	X		X			X
University of California--Berkeley	Berkeley, CA	9 (tie)	4	Epidemiology	PhD				X		In person	https://publichealth.berkeley.edu/academics/epidemiology/epidemiology-phd/		X		X		X
University of California--Berkeley	Berkeley, CA	9 (tie)	4	Health Policy	PhD				X		In person	https://publichealth.berkeley.edu/academics/health-policy-and-management/health-policy-phd/		X		X				X
University of California--Berkeley	Berkeley, CA	9 (tie)	4	Infectious Diseases and Immunity	PhD		X	Fall 2021		optional	In person	https://publichealth.berkeley.edu/academics/infectious-diseases-and-vaccinology/infectious-diseases-and-immunity-phd/	https://archive.vn/ZC7xU , https://archive.vn/CbyYD	X		X
University of Minnesota--Twin Cities	Minneapolis, MN	9 (tie)	4	Healthcare Administration	MHA		X	Fall 2021, Spring 2021		-	Hybrid	https://www.sph.umn.edu/academics/degrees-programs/mha/executive-master-healthcare-administration/	https://web.archive.org/web/20200823211201/https://www.sph.umn.edu/prospective/application-process/#required-entrance-exams	X	X
University of Minnesota--Twin Cities	Minneapolis, MN	9 (tie)	4	Healthcare Administration	MHA		X	Fall 2021, Spring 2021		-	In person	https://www.sph.umn.edu/academics/degrees-programs/mha/master-healthcare-administration/	https://web.archive.org/web/20200823211201/https://www.sph.umn.edu/prospective/application-process/#required-entrance-exams	X	X
University of Minnesota--Twin Cities	Minneapolis, MN	9 (tie)	4	Biostatistics	MPH		X	Fall 2021, Spring 2021		-	In person	https://www.sph.umn.edu/academics/degrees-programs/mph/biostatistics/	https://web.archive.org/web/20200823211201/https://www.sph.umn.edu/prospective/application-process/#required-entrance-exams	X	X		X
University of Minnesota--Twin Cities	Minneapolis, MN	9 (tie)	4	Community Health Promotion	MPH	X				-	In person	https://www.sph.umn.edu/academics/degrees-programs/mph/community-health-promotion/	https://web.archive.org/web/20200425042745/https://www.sph.umn.edu/academics/degrees-programs/mph/community-health-promotion/admissions/	X	X						X
University of Minnesota--Twin Cities	Minneapolis, MN	9 (tie)	4	Environmental Health	MPH		X	Fall 2021, Spring 2021		-	In person	https://www.sph.umn.edu/academics/degrees-programs/mph/enhs/	https://web.archive.org/web/20200823211201/https://www.sph.umn.edu/prospective/application-process/#required-entrance-exams	X	X				X
University of Minnesota--Twin Cities	Minneapolis, MN	9 (tie)	4	Epidemiology	MPH	X				-	In person	https://www.sph.umn.edu/academics/degrees-programs/mph/epidemiology/	https://web.archive.org/web/20200425043557/https://www.sph.umn.edu/academics/degrees-programs/mph/epidemiology/admissions/	X	X			X
University of Minnesota--Twin Cities	Minneapolis, MN	9 (tie)	4	Maternal and Child Health	MPH	X				-	In person	https://www.sph.umn.edu/academics/degrees-programs/mph/maternal-child-health/	https://web.archive.org/web/20200526190039/https://www.sph.umn.edu/academics/degrees-programs/mph/maternal-child-health/admissions/	X	X
University of Minnesota--Twin Cities	Minneapolis, MN	9 (tie)	4	Public Health Administration and Policy	MPH		X	Fall 2021, Spring 2021		-	Hybrid, online	https://www.sph.umn.edu/academics/degrees-programs/mph/executive-public-health-administration-policy/	https://web.archive.org/web/20200823211201/https://www.sph.umn.edu/prospective/application-process/#required-entrance-exams	X	X					X
University of Minnesota--Twin Cities	Minneapolis, MN	9 (tie)	4	Public Health Administration and Policy	MPH	X				-	In person	https://www.sph.umn.edu/academics/degrees-programs/mph/public-health-administration-policy/	https://web.archive.org/web/20200425045157/https://www.sph.umn.edu/academics/degrees-programs/mph/public-health-administration-policy/admissions/	X	X					X
University of Minnesota--Twin Cities	Minneapolis, MN	9 (tie)	4	Public Health Nutrition	MPH	X				-	In person	https://www.sph.umn.edu/academics/degrees-programs/mph/public-health-nutrition/	https://web.archive.org/web/20200425050035/https://www.sph.umn.edu/academics/degrees-programs/mph/public-health-nutrition/admissions/	X	X
University of Minnesota--Twin Cities	Minneapolis, MN	9 (tie)	4	Public Health Practice	MPH		X	Fall 2021, Spring 2021		-	Hybrid	https://www.sph.umn.edu/academics/degrees-programs/distance/phpexec/	https://web.archive.org/web/20200823211201/https://www.sph.umn.edu/prospective/application-process/#required-entrance-exams	X	X
University of Minnesota--Twin Cities	Minneapolis, MN	9 (tie)	4	Biostatistics	MS		X	Fall 2021, Spring 2021		-	In person	https://www.sph.umn.edu/academics/degrees-programs/ms/biostatistics/	https://web.archive.org/web/20200823211201/https://www.sph.umn.edu/prospective/application-process/#required-entrance-exams	X	X		X
University of Minnesota--Twin Cities	Minneapolis, MN	9 (tie)	4	Clinical Research	MS		X	Fall 2021, Spring 2021		-	In person	https://www.sph.umn.edu/academics/degrees-programs/ms/cr/	https://web.archive.org/web/20200823211201/https://www.sph.umn.edu/prospective/application-process/#required-entrance-exams	X	X
University of Minnesota--Twin Cities	Minneapolis, MN	9 (tie)	4	Environmental Health	MS		X	Fall 2021, Spring 2021		-	In person	https://www.sph.umn.edu/academics/degrees-programs/ms/enhs/	https://web.archive.org/web/20200823211201/https://www.sph.umn.edu/prospective/application-process/#required-entrance-exams	X	X				X
University of Minnesota--Twin Cities	Minneapolis, MN	9 (tie)	4	Health Services Research, Policy and Administration	MS		X	Fall 2021, Spring 2021		-	In person	https://www.sph.umn.edu/academics/degrees-programs/ms/health-services-research-policy-administration/	https://web.archive.org/web/20200823211201/https://www.sph.umn.edu/prospective/application-process/#required-entrance-exams	X	X					X
University of Minnesota--Twin Cities	Minneapolis, MN	9 (tie)	4	Biostatistics	PhD		X	Fall 2021, Spring 2021		-	In person	https://www.sph.umn.edu/academics/degrees-programs/phd/biostatistics/	https://web.archive.org/web/20200823211201/https://www.sph.umn.edu/prospective/application-process/#required-entrance-exams	X		X	X
University of Minnesota--Twin Cities	Minneapolis, MN	9 (tie)	4	Environmental Health	PhD		X	Fall 2021, Spring 2021		-	In person	https://www.sph.umn.edu/academics/degrees-programs/phd/enhs/	https://web.archive.org/web/20200823211201/https://www.sph.umn.edu/prospective/application-process/#required-entrance-exams	X		X			X
University of Minnesota--Twin Cities	Minneapolis, MN	9 (tie)	4	Epidemiology	PhD		X	Fall 2021, Spring 2021		-	In person	https://www.sph.umn.edu/academics/degrees-programs/phd/epidemiology/	https://web.archive.org/web/20200823211201/https://www.sph.umn.edu/prospective/application-process/#required-entrance-exams	X		X		X
University of Minnesota--Twin Cities	Minneapolis, MN	9 (tie)	4	Health Services Research, Policy and Administration	PhD		X	Fall 2021, Spring 2021		-	In person	https://www.sph.umn.edu/academics/degrees-programs/phd/hsrpa/	https://web.archive.org/web/20200823211201/https://www.sph.umn.edu/prospective/application-process/#required-entrance-exams	X		X				X
University of California--Los Angeles	Los Angeles, CA	11	3.9	Biostatitics	MPH		X	Fall 2021		optional?	In person	https://ph.ucla.edu/academics/departments/biostatistics/mph-biostatistics	https://archive.vn/DAWMc	X	X		X
University of California--Los Angeles	Los Angeles, CA	11	3.9	Community Health Sciences	MPH		X	Fall 2021		optional?	In person	https://ph.ucla.edu/academics/departments/community-health-sciences/mph-community-health-sciences	https://archive.vn/DAWMc	X	X						X
University of California--Los Angeles	Los Angeles, CA	11	3.9	Environmental Health Sciences	MPH		X	Fall 2021		optional?	In person	https://ph.ucla.edu/academics/departments/environmental-health-sciences/mph-environmental-health-sciences	https://archive.vn/DAWMc	X	X				X
University of California--Los Angeles	Los Angeles, CA	11	3.9	Epidemiology	MPH		X	Fall 2021		optional?	In person	https://ph.ucla.edu/academics/departments/epidemiology/mph-epidemiology	https://archive.vn/DAWMc	X	X			X
University of California--Los Angeles	Los Angeles, CA	11	3.9	Health Policy and Management: Health Management	MPH		X	Fall 2021		optional?	In person	https://ph.ucla.edu/academics/departments/health-policy-and-management/mph-program-health-policy-management-health	https://archive.vn/DAWMc	X	X					X
University of California--Los Angeles	Los Angeles, CA	11	3.9	Health Policy and Management: Health Policy	MPH		X	Fall 2021		optional?	In person	https://ph.ucla.edu/academics/departments/health-policy-and-management/mph-health-policy-and-management-health-policy	https://archive.vn/DAWMc	X	X					X
University of California--Los Angeles	Los Angeles, CA	11	3.9	Biostatitics	MS				X		In person	https://ph.ucla.edu/academics/departments/biostatistics/ms-biostatistics		X	X		X
University of California--Los Angeles	Los Angeles, CA	11	3.9	Community Health Sciences	MS		X	Fall 2021		optional?	In person	https://ph.ucla.edu/academics/departments/community-health-sciences/ms-community-health-sciences	https://archive.vn/DAWMc	X	X						X
University of California--Los Angeles	Los Angeles, CA	11	3.9	Environmental Health Sciences	MS		X	Fall 2021		optional?	In person	https://ph.ucla.edu/academics/departments/environmental-health-sciences/ms-environmental-health-sciences	https://archive.vn/DAWMc	X	X				X
University of California--Los Angeles	Los Angeles, CA	11	3.9	Epidemiology	MS		X	Fall 2021		recommended	In person	https://ph.ucla.edu/academics/departments/epidemiology/ms-epidemiology	https://archive.vn/DAWMc	X	X			X
University of California--Los Angeles	Los Angeles, CA	11	3.9	Health Policy and Management Research	MS		X	Fall 2021		recommended	In person	https://ph.ucla.edu/academics/departments/health-policy-and-management/ms-health-policy-and-management-research	https://archive.vn/DAWMc	X	X					X
University of California--Los Angeles	Los Angeles, CA	11	3.9	Biostatitics	PhD				X		In person	https://ph.ucla.edu/academics/departments/biostatistics/phd-biostatistics		X		X	X
University of California--Los Angeles	Los Angeles, CA	11	3.9	Community Health Sciences	PhD		X	Fall 2021		optional?	In person	https://ph.ucla.edu/academics/departments/community-health-sciences/phd-community-health-sciences	https://archive.vn/DAWMc	X		X					X
University of California--Los Angeles	Los Angeles, CA	11	3.9	Environmental Health Sciences	PhD		X	Fall 2021		optional?	In person	https://ph.ucla.edu/academics/departments/environmental-health-sciences/phd-environmental-health-sciences	https://archive.vn/DAWMc	X		X			X
University of California--Los Angeles	Los Angeles, CA	11	3.9	Epidemiology	PhD		X	Fall 2021		recommended	In person	https://ph.ucla.edu/academics/departments/epidemiology/phd-epidemiology	https://archive.vn/DAWMc	X		X		X
University of California--Los Angeles	Los Angeles, CA	11	3.9	Health Policy and Management	PhD		X	Fall 2021		recommended	In person	https://ph.ucla.edu/academics/departments/health-policy-and-management/phd-program-health-policy-management	https://archive.vn/DAWMc	X		X				X
University of California--Los Angeles	Los Angeles, CA	11	3.9	Molecular Toxicology	PhD				X		In person	https://ph.ucla.edu/academics/departments/environmental-health-sciences/pdd-program-molecular-toxicology-environmental		X		X			X
George Washington University	Washington, DC	12	3.8	Environmental and Occupational Health	DrPH		X	Fall 2021		optional	In person	https://publichealth.gwu.edu/programs/environmental-occupational-health-drph	https://web.archive.org/web/20200823185430/https://publichealth.gwu.edu/admissions/graduate-admissions	X		X			X
George Washington University	Washington, DC	12	3.8	Global Health	DrPH		X	Fall 2021		optional	In person	https://publichealth.gwu.edu/programs/global-health-drph	https://web.archive.org/web/20200823185430/https://publichealth.gwu.edu/admissions/graduate-admissions	X		X
George Washington University	Washington, DC	12	3.8	Health Behavior	DrPH		X	Fall 2021		optional	In person	https://publichealth.gwu.edu/programs/health-behavior-drph	https://web.archive.org/web/20200823185430/https://publichealth.gwu.edu/admissions/graduate-admissions	X		X					X
George Washington University	Washington, DC	12	3.8	Health Policy	DrPH		X	Fall 2021		optional	In person	https://publichealth.gwu.edu/programs/health-policy-drph	https://web.archive.org/web/20200823185430/https://publichealth.gwu.edu/admissions/graduate-admissions	X		X				X
George Washington University	Washington, DC	12	3.8	Health Administration	MHA		X	Fall 2021, Fall 2020		optional	In person	https://publichealth.gwu.edu/academics/programs	https://web.archive.org/web/20200823185430/https://publichealth.gwu.edu/admissions/graduate-admissions , https://web.archive.org/web/20200521065257/https://publichealth.gwu.edu/admissions/graduate-admissions	X	X
George Washington University	Washington, DC	12	3.8	Health Administration	MHA	X				optional	Online	https://onlinepublichealth.gwu.edu/applications/form/	https://web.archive.org/web/20200830172714/https://onlinepublichealth.gwu.edu/applications/form/	X	X
George Washington University	Washington, DC	12	3.8	Biostatistics	MPH		X	Fall 2021, Fall 2020		optional	In person	https://publichealth.gwu.edu/academics/programs	https://web.archive.org/web/20200823185430/https://publichealth.gwu.edu/admissions/graduate-admissions , https://web.archive.org/web/20200521065257/https://publichealth.gwu.edu/admissions/graduate-admissions	X	X		X
George Washington University	Washington, DC	12	3.8	Community Oriented Primary Care	MPH		X	Fall 2021, Fall 2020		optional	In person	https://publichealth.gwu.edu/academics/programs	https://web.archive.org/web/20200823185430/https://publichealth.gwu.edu/admissions/graduate-admissions , https://web.archive.org/web/20200521065257/https://publichealth.gwu.edu/admissions/graduate-admissions	X	X						X
George Washington University	Washington, DC	12	3.8	Environmental and Occupational Health	MPH	X				optional	Online	https://publichealthonline.gwu.edu/	https://web.archive.org/web/20200830172813/https://onlinepublichealth.gwu.edu/mph/#admissions	X	X				X
George Washington University	Washington, DC	12	3.8	Environmental Health Science and Policy	MPH		X	Fall 2021, Fall 2020		optional	In person	https://publichealth.gwu.edu/academics/programs	https://web.archive.org/web/20200823185430/https://publichealth.gwu.edu/admissions/graduate-admissions , https://web.archive.org/web/20200521065257/https://publichealth.gwu.edu/admissions/graduate-admissions	X	X				X	X
George Washington University	Washington, DC	12	3.8	Epidemiology	MPH		X	Fall 2021, Fall 2020		optional	In person	https://publichealth.gwu.edu/academics/programs	https://web.archive.org/web/20200823185430/https://publichealth.gwu.edu/admissions/graduate-admissions , https://web.archive.org/web/20200521065257/https://publichealth.gwu.edu/admissions/graduate-admissions	X	X			X
George Washington University	Washington, DC	12	3.8	Epidemiology and Public Health Research Methods	MPH	X				optional	Online	https://publichealthonline.gwu.edu/	https://web.archive.org/web/20200830172813/https://onlinepublichealth.gwu.edu/mph/#admissions	X	X			X
George Washington University	Washington, DC	12	3.8	Global Environmental Health	MPH		X	Fall 2021, Fall 2020		optional	In person	https://publichealth.gwu.edu/academics/programs	https://web.archive.org/web/20200823185430/https://publichealth.gwu.edu/admissions/graduate-admissions , https://web.archive.org/web/20200521065257/https://publichealth.gwu.edu/admissions/graduate-admissions	X	X				X
George Washington University	Washington, DC	12	3.8	Global Health	MPH	X				optional	Online	https://publichealthonline.gwu.edu/	https://web.archive.org/web/20200830172813/https://onlinepublichealth.gwu.edu/mph/#admissions	X	X
George Washington University	Washington, DC	12	3.8	Global Health Epidemiology and Disease Control	MPH		X	Fall 2021, Fall 2020		optional	In person	https://publichealth.gwu.edu/academics/programs	https://web.archive.org/web/20200823185430/https://publichealth.gwu.edu/admissions/graduate-admissions , https://web.archive.org/web/20200521065257/https://publichealth.gwu.edu/admissions/graduate-admissions	X	X
George Washington University	Washington, DC	12	3.8	Global Health Policy	MPH		X	Fall 2021, Fall 2020		optional	In person	https://publichealth.gwu.edu/academics/programs	https://web.archive.org/web/20200823185430/https://publichealth.gwu.edu/admissions/graduate-admissions , https://web.archive.org/web/20200521065257/https://publichealth.gwu.edu/admissions/graduate-admissions	X	X					X
George Washington University	Washington, DC	12	3.8	Global Health Program Design, Monitoring and Evaluation	MPH		X	Fall 2021, Fall 2020		optional	In person	https://publichealth.gwu.edu/academics/programs	https://web.archive.org/web/20200823185430/https://publichealth.gwu.edu/admissions/graduate-admissions , https://web.archive.org/web/20200521065257/https://publichealth.gwu.edu/admissions/graduate-admissions	X	X					X
George Washington University	Washington, DC	12	3.8	Health Communication	MPH	X				optional	Online	https://publichealthonline.gwu.edu/	https://web.archive.org/web/20200830172813/https://onlinepublichealth.gwu.edu/mph/#admissions	X	X						X
George Washington University	Washington, DC	12	3.8	Health Policy	MPH		X	Fall 2021, Fall 2020		optional	In person	https://publichealth.gwu.edu/academics/programs	https://web.archive.org/web/20200823185430/https://publichealth.gwu.edu/admissions/graduate-admissions , https://web.archive.org/web/20200521065257/https://publichealth.gwu.edu/admissions/graduate-admissions	X	X					X
George Washington University	Washington, DC	12	3.8	Health Policy	MPH	X				optional	Online	https://publichealthonline.gwu.edu/	https://web.archive.org/web/20200830172813/https://onlinepublichealth.gwu.edu/mph/#admissions	X	X					X
George Washington University	Washington, DC	12	3.8	Health Promotion	MPH		X	Fall 2021, Fall 2020		optional	In person	https://publichealth.gwu.edu/academics/programs	https://web.archive.org/web/20200823185430/https://publichealth.gwu.edu/admissions/graduate-admissions , https://web.archive.org/web/20200521065257/https://publichealth.gwu.edu/admissions/graduate-admissions	X	X						X
George Washington University	Washington, DC	12	3.8	Humanitarian Health	MPH		X	Fall 2021, Fall 2020		optional	In person	https://publichealth.gwu.edu/academics/programs	https://web.archive.org/web/20200823185430/https://publichealth.gwu.edu/admissions/graduate-admissions , https://web.archive.org/web/20200521065257/https://publichealth.gwu.edu/admissions/graduate-admissions	X	X
George Washington University	Washington, DC	12	3.8	Maternal and Child Health	MPH		X	Fall 2021, Fall 2020		optional	In person	https://publichealth.gwu.edu/academics/programs	https://web.archive.org/web/20200823185430/https://publichealth.gwu.edu/admissions/graduate-admissions , https://web.archive.org/web/20200521065257/https://publichealth.gwu.edu/admissions/graduate-admissions	X	X
George Washington University	Washington, DC	12	3.8	Physical Activity in Public Health	MPH		X	Fall 2021, Fall 2020		optional	In person	https://publichealth.gwu.edu/academics/programs	https://web.archive.org/web/20200823185430/https://publichealth.gwu.edu/admissions/graduate-admissions , https://web.archive.org/web/20200521065257/https://publichealth.gwu.edu/admissions/graduate-admissions	X	X
George Washington University	Washington, DC	12	3.8	Program Planning and Evaluation	MPH	X				optional	Online	https://publichealthonline.gwu.edu/	https://web.archive.org/web/20200830172813/https://onlinepublichealth.gwu.edu/mph/#admissions	X	X
George Washington University	Washington, DC	12	3.8	Public Health Communication and Marketing	MPH		X	Fall 2021, Fall 2020		optional	In person	https://publichealth.gwu.edu/academics/programs	https://web.archive.org/web/20200823185430/https://publichealth.gwu.edu/admissions/graduate-admissions , https://web.archive.org/web/20200521065257/https://publichealth.gwu.edu/admissions/graduate-admissions	X	X						X
George Washington University	Washington, DC	12	3.8	Public Health Nutrition	MPH		X	Fall 2021, Fall 2020		optional	In person	https://publichealth.gwu.edu/academics/programs	https://web.archive.org/web/20200823185430/https://publichealth.gwu.edu/admissions/graduate-admissions , https://web.archive.org/web/20200521065257/https://publichealth.gwu.edu/admissions/graduate-admissions	X	X
George Washington University	Washington, DC	12	3.8	Biostatistics	MS		X	Fall 2021, Fall 2020		optional	In person	https://publichealth.gwu.edu/academics/programs	https://web.archive.org/web/20200823185430/https://publichealth.gwu.edu/admissions/graduate-admissions , https://web.archive.org/web/20200521065257/https://publichealth.gwu.edu/admissions/graduate-admissions	X	X		X
George Washington University	Washington, DC	12	3.8	Epidemiology	MS				X		In person	https://publichealth.gwu.edu/programs/epidemiology-ms		X	X			X
George Washington University	Washington, DC	12	3.8	Public Health Microbiology and Emerging Infectious Diseases	MS		X	Fall 2021, Fall 2020		optional	In person	https://publichealth.gwu.edu/academics/programs	https://web.archive.org/web/20200823185430/https://publichealth.gwu.edu/admissions/graduate-admissions , https://web.archive.org/web/20200521065257/https://publichealth.gwu.edu/admissions/graduate-admissions	X	X
George Washington University	Washington, DC	12	3.8	Strength and Conditioning	MS		X	Fall 2021, Fall 2020		optional	In person	https://publichealth.gwu.edu/academics/programs	https://web.archive.org/web/20200823185430/https://publichealth.gwu.edu/admissions/graduate-admissions , https://web.archive.org/web/20200521065257/https://publichealth.gwu.edu/admissions/graduate-admissions	X	X
George Washington University	Washington, DC	12	3.8	Biostatitics	PhD				X		In person	https://publichealth.gwu.edu/programs/biostatistics-phd		X		X	X
George Washington University	Washington, DC	12	3.8	Environmental Health	PhD				X		In person	https://publichealth.gwu.edu/programs/environmental-health-phd		X		X			X
George Washington University	Washington, DC	12	3.8	Epidemiology	PhD				X		In person	https://publichealth.gwu.edu/programs/epidemiology-phd		X		X		X
George Washington University	Washington, DC	12	3.8	Exercise Physiology and Applied Nutrition	PhD				X		In person	https://publichealth.gwu.edu/programs/phd-exercise-physiology-and-applied-nutrition		X		X
George Washington University	Washington, DC	12	3.8	Health Policy	PhD				X		In person	https://publichealth.gwu.edu/programs/health-policy-phd		X		X				X
George Washington University	Washington, DC	12	3.8	Social and Behavioral Sciences in Public Health	PhD				X		In person	https://publichealth.gwu.edu/programs/social-and-behavioral-sciences-phd		X		X					X
Tulane University	New Orleans, LA	13 (tie)	3.7	Global Community Health and Behavioral Sciences	DrPH				X		In person	https://sph.tulane.edu/gchb/drph		X		X					X
Tulane University	New Orleans, LA	13 (tie)	3.7	Health Administration	MHA		X	Fall 2021, Fall 2020		optional	In person	https://sph.tulane.edu/mha	https://web.archive.org/web/20200823200217/https://sph.tulane.edu/how-apply-sphtm , https://web.archive.org/web/20200608111932/https://sph.tulane.edu/how-apply-sphtm	X	X
Tulane University	New Orleans, LA	13 (tie)	3.7	Community Health Sciences	MPH		X	Fall 2021, Fall 2020		optional	In person	https://sph.tulane.edu/gchb/mph-chs	https://web.archive.org/web/20200823200217/https://sph.tulane.edu/how-apply-sphtm , https://web.archive.org/web/20200608111932/https://sph.tulane.edu/how-apply-sphtm	X	X						X
Tulane University	New Orleans, LA	13 (tie)	3.7	Community Health Sciences	MPH	X				-	Online	https://sph.tulane.edu/online/mph-chs	https://web.archive.org/web/20200830173227/https://publichealth.tulane.edu/admissions/	X	X						X
Tulane University	New Orleans, LA	13 (tie)	3.7	Disaster Management	MPH		X	Fall 2021, Fall 2020		optional	In person	https://sph.tulane.edu/ehs/mph-dm	https://web.archive.org/web/20200823200217/https://sph.tulane.edu/how-apply-sphtm , https://web.archive.org/web/20200608111932/https://sph.tulane.edu/how-apply-sphtm	X	X
Tulane University	New Orleans, LA	13 (tie)	3.7	Disaster Management	MPH	X				-	Online	https://sph.tulane.edu/online/mph-disaster-management	https://web.archive.org/web/20200830173227/https://publichealth.tulane.edu/admissions/	X	X
Tulane University	New Orleans, LA	13 (tie)	3.7	Epidemiology	MPH		X	Fall 2021, Fall 2020		optional	In person	https://sph.tulane.edu/epid/mph	https://web.archive.org/web/20200823200217/https://sph.tulane.edu/how-apply-sphtm , https://web.archive.org/web/20200608111932/https://sph.tulane.edu/how-apply-sphtm	X	X			X
Tulane University	New Orleans, LA	13 (tie)	3.7	Health Education and Communication	MPH		X	Fall 2021, Fall 2020		optional	In person	https://sph.tulane.edu/gchb/mph-hedc	https://web.archive.org/web/20200823200217/https://sph.tulane.edu/how-apply-sphtm , https://web.archive.org/web/20200608111932/https://sph.tulane.edu/how-apply-sphtm	X	X						X
Tulane University	New Orleans, LA	13 (tie)	3.7	Health Policy	MPH		X	Fall 2021, Fall 2020		optional	In person	https://sph.tulane.edu/hpm/mph-hp	https://web.archive.org/web/20200823200217/https://sph.tulane.edu/how-apply-sphtm , https://web.archive.org/web/20200608111932/https://sph.tulane.edu/how-apply-sphtm	X	X					X
Tulane University	New Orleans, LA	13 (tie)	3.7	Health Systems Management	MPH		X	Fall 2021, Fall 2020		optional	In person	https://sph.tulane.edu/hpm/mph-hsm	https://web.archive.org/web/20200823200217/https://sph.tulane.edu/how-apply-sphtm , https://web.archive.org/web/20200608111932/https://sph.tulane.edu/how-apply-sphtm	X	X					X
Tulane University	New Orleans, LA	13 (tie)	3.7	International Health and Development	MPH		X	Fall 2021, Fall 2020		optional	In person	https://sph.tulane.edu/gchb/mph-ihd	https://web.archive.org/web/20200823200217/https://sph.tulane.edu/how-apply-sphtm , https://web.archive.org/web/20200608111932/https://sph.tulane.edu/how-apply-sphtm	X	X
Tulane University	New Orleans, LA	13 (tie)	3.7	Maternal and Child Health	MPH		X	Fall 2021, Fall 2020		optional	In person	https://sph.tulane.edu/gchb/mph-mch	https://web.archive.org/web/20200823200217/https://sph.tulane.edu/how-apply-sphtm , https://web.archive.org/web/20200608111932/https://sph.tulane.edu/how-apply-sphtm	X	X
Tulane University	New Orleans, LA	13 (tie)	3.7	Nutrition	MPH		X	Fall 2021, Fall 2020		optional	In person	https://sph.tulane.edu/gchb/mph-nutr	https://web.archive.org/web/20200823200217/https://sph.tulane.edu/how-apply-sphtm , https://web.archive.org/web/20200608111932/https://sph.tulane.edu/how-apply-sphtm	X	X
Tulane University	New Orleans, LA	13 (tie)	3.7	Occupational and Environmental Health	MPH	X				-	Online	https://sph.tulane.edu/online/mph-occupational-environmental-health	https://web.archive.org/web/20200830173227/https://publichealth.tulane.edu/admissions/	X	X				X
Tulane University	New Orleans, LA	13 (tie)	3.7	Occupational Health and Safety Management	MPH	X				-	Online	https://sph.tulane.edu/online/mph-occupational-health-safety	https://web.archive.org/web/20200830173227/https://publichealth.tulane.edu/admissions/	X	X				X	X
Tulane University	New Orleans, LA	13 (tie)	3.7	Public Health and Tropical Medicine	MPHTM		X	Fall 2021, Fall 2020		optional	In person	https://sph.tulane.edu/trmd/mphtm	https://web.archive.org/web/20200823200217/https://sph.tulane.edu/how-apply-sphtm , https://web.archive.org/web/20200608111932/https://sph.tulane.edu/how-apply-sphtm	X	X
Tulane University	New Orleans, LA	13 (tie)	3.7	Biostatistics	MS		X	Fall 2021, Fall 2020		optional	In person	https://sph.tulane.edu/bios/ms	https://web.archive.org/web/20200823200217/https://sph.tulane.edu/how-apply-sphtm , https://web.archive.org/web/20200608111932/https://sph.tulane.edu/how-apply-sphtm	X	X		X
Tulane University	New Orleans, LA	13 (tie)	3.7	Clinical Investigation	MS		X	Fall 2021, Fall 2020		optional	In person	https://sph.tulane.edu/epid/ms-ci	https://web.archive.org/web/20200823200217/https://sph.tulane.edu/how-apply-sphtm , https://web.archive.org/web/20200608111932/https://sph.tulane.edu/how-apply-sphtm	X	X
Tulane University	New Orleans, LA	13 (tie)	3.7	Epidemiology	MS		X	Fall 2021, Fall 2020		optional	In person	https://sph.tulane.edu/epid/ms	https://web.archive.org/web/20200823200217/https://sph.tulane.edu/how-apply-sphtm , https://web.archive.org/web/20200608111932/https://sph.tulane.edu/how-apply-sphtm	X	X			X
Tulane University	New Orleans, LA	13 (tie)	3.7	Tropical Medicine	MS		X	Fall 2021, Fall 2020		optional	In person	https://sph.tulane.edu/trmd/ms	https://web.archive.org/web/20200823200217/https://sph.tulane.edu/how-apply-sphtm , https://web.archive.org/web/20200608111932/https://sph.tulane.edu/how-apply-sphtm	X	X
Tulane University	New Orleans, LA	13 (tie)	3.7	Biostatistics	MSPH		X	Fall 2021, Fall 2020		optional	In person	https://sph.tulane.edu/bios/msph	https://web.archive.org/web/20200823200217/https://sph.tulane.edu/how-apply-sphtm , https://web.archive.org/web/20200608111932/https://sph.tulane.edu/how-apply-sphtm	X	X		X
Tulane University	New Orleans, LA	13 (tie)	3.7	Environmental Health Sciences	MSPH		X	Fall 2021, Fall 2020		optional	In person	https://sph.tulane.edu/ehs/msph	https://web.archive.org/web/20200823200217/https://sph.tulane.edu/how-apply-sphtm , https://web.archive.org/web/20200608111932/https://sph.tulane.edu/how-apply-sphtm	X	X				X
Tulane University	New Orleans, LA	13 (tie)	3.7	Industrial Hygiene	MSPH		X	Fall 2021, Fall 2020		optional	In person	https://sph.tulane.edu/ehs/msph-ih	https://web.archive.org/web/20200823200217/https://sph.tulane.edu/how-apply-sphtm , https://web.archive.org/web/20200608111932/https://sph.tulane.edu/how-apply-sphtm	X	X				X
Tulane University	New Orleans, LA	13 (tie)	3.7	Industrial Hygiene	MSPH				X		Online	https://sph.tulane.edu/online/msph-industrial-hygiene		X	X				X
Tulane University	New Orleans, LA	13 (tie)	3.7	Biostatistics	PhD				X		In person	https://sph.tulane.edu/bios/phd		X		X	X
Tulane University	New Orleans, LA	13 (tie)	3.7	Environmental Health Sciences	PhD				X		In person	https://sph.tulane.edu/ehs/phd		X		X			X
Tulane University	New Orleans, LA	13 (tie)	3.7	Epidemiology	PhD				X		In person	https://sph.tulane.edu/epid/phd		X		X		X
Tulane University	New Orleans, LA	13 (tie)	3.7	Global Community Health and Behavioral Sciences	PhD				X		In person	https://sph.tulane.edu/gchb/phd		X		X					X
Tulane University	New Orleans, LA	13 (tie)	3.7	Health Policy and Management	PhD				X		In person	https://sph.tulane.edu/hpm/phd		X		X				X
Tulane University	New Orleans, LA	13 (tie)	3.7	Tropical Medicine	PhD				X		In person	https://sph.tulane.edu/trmd/phd		X		X
University of Pittsburgh	Pittsburgh, PA	13 (tie)	3.7	Health Administration	MHA				X		In person	https://publichealth.pitt.edu/health-policy-and-management/academics/mha		X	X
University of Pittsburgh	Pittsburgh, PA	13 (tie)	3.7	Behavioral and Community Health Sciences	MPH		X	Fall 2021, Spring 2021		optional	In person	https://www.publichealth.pitt.edu/behavioral-and-community-health-sciences/academics/mph	https://web.archive.org/web/20200823225758/https://www.publichealth.pitt.edu/home/admissions-aid/how-to-apply/requirements	X	X						X
University of Pittsburgh	Pittsburgh, PA	13 (tie)	3.7	Environmental and Occupational Health	MPH		X	Fall 2021, Spring 2021		optional	In person	https://www.publichealth.pitt.edu/environmental-and-occupational-health/academics/mph	https://web.archive.org/web/20200823225758/https://www.publichealth.pitt.edu/home/admissions-aid/how-to-apply/requirements	X	X
University of Pittsburgh	Pittsburgh, PA	13 (tie)	3.7	Epidemiology	MPH		X	Fall 2021, Spring 2021		optional	In person	https://www.publichealth.pitt.edu/epidemiology/academics/mph	https://web.archive.org/web/20200823225758/https://www.publichealth.pitt.edu/home/admissions-aid/how-to-apply/requirements	X	X			X
University of Pittsburgh	Pittsburgh, PA	13 (tie)	3.7	Health Policy and Management	MPH		X	Fall 2021, Spring 2021		optional	In person	https://www.publichealth.pitt.edu/health-policy-and-management/academics/mph	https://web.archive.org/web/20200823225758/https://www.publichealth.pitt.edu/home/admissions-aid/how-to-apply/requirements	X	X					X
University of Pittsburgh	Pittsburgh, PA	13 (tie)	3.7	Human Genetics	MPH		X	Fall 2021, Spring 2021		optional	In person	https://publichealth.pitt.edu/human-genetics/academics/mph	https://web.archive.org/web/20200826214201/https://www.publichealth.pitt.edu/home/admissions-aid/how-to-apply/requirements	X	X
University of Pittsburgh	Pittsburgh, PA	13 (tie)	3.7	Infectious Disease Management, Intervention, and Community Practice	MPH		X	Fall 2021, Spring 2021		optional	In person	https://www.publichealth.pitt.edu/mph-mic	https://web.archive.org/web/20200823225758/https://www.publichealth.pitt.edu/home/admissions-aid/how-to-apply/requirements	X	X					X
University of Pittsburgh	Pittsburgh, PA	13 (tie)	3.7	Infectious Disease Pathogenesis, Eradication, and Laboratory Practice	MPH		X	Fall 2021, Spring 2021		optional	In person	https://www.publichealth.pitt.edu/mph-pel	https://web.archive.org/web/20200823225758/https://www.publichealth.pitt.edu/home/admissions-aid/how-to-apply/requirements	X	X
University of Pittsburgh	Pittsburgh, PA	13 (tie)	3.7	Multidisciplinary	MPH				X		In person	https://publichealth.pitt.edu/mmph		X	X
University of Pittsburgh	Pittsburgh, PA	13 (tie)	3.7	Biostatistics	MS		X	Fall 2021, Spring 2021		optional	In person	https://www.publichealth.pitt.edu/biostatistics-ms	https://web.archive.org/web/20200823225758/https://www.publichealth.pitt.edu/home/admissions-aid/how-to-apply/requirements	X	X		X
University of Pittsburgh	Pittsburgh, PA	13 (tie)	3.7	Environmental and Occupational Health	MS		X	Fall 2021, Spring 2021		optional	In person	https://www.publichealth.pitt.edu/environmental-and-occupational-health/academics/ms	https://web.archive.org/web/20200823225758/https://www.publichealth.pitt.edu/home/admissions-aid/how-to-apply/requirements	X	X				X
University of Pittsburgh	Pittsburgh, PA	13 (tie)	3.7	Epidemiology	MS		X	Fall 2021, Spring 2021		optional	In person	https://www.publichealth.pitt.edu/epidemiology/academics/ms	https://web.archive.org/web/20200823225758/https://www.publichealth.pitt.edu/home/admissions-aid/how-to-apply/requirements	X	X			X
University of Pittsburgh	Pittsburgh, PA	13 (tie)	3.7	Genetic Counseling	MS				X		In person	https://publichealth.pitt.edu/gcprogram		X	X
University of Pittsburgh	Pittsburgh, PA	13 (tie)	3.7	Genome Bioinformatics	MS		X	Fall 2021, Spring 2021		optional	In person	https://www.publichealth.pitt.edu/human-genetics/msgb	https://web.archive.org/web/20200823225758/https://www.publichealth.pitt.edu/home/admissions-aid/how-to-apply/requirements	X	X
University of Pittsburgh	Pittsburgh, PA	13 (tie)	3.7	Health Services Research and Policy	MS				X		In person	https://publichealth.pitt.edu/health-policy-and-management/academics/ms		X	X					X
University of Pittsburgh	Pittsburgh, PA	13 (tie)	3.7	Human Genetics	MS		X	Fall 2021, Spring 2021		optional	In person	https://publichealth.pitt.edu/human-genetics/academics/ms	https://web.archive.org/web/20200826214201/https://www.publichealth.pitt.edu/home/admissions-aid/how-to-apply/requirements	X	X
University of Pittsburgh	Pittsburgh, PA	13 (tie)	3.7	Infectious Diseases and Microbiology	MS		X	Fall 2021, Spring 2021		optional	In person	https://www.publichealth.pitt.edu/infectious-diseases-and-microbiology/academics/ms	https://web.archive.org/web/20200823225758/https://www.publichealth.pitt.edu/home/admissions-aid/how-to-apply/requirements	X	X
University of Pittsburgh	Pittsburgh, PA	13 (tie)	3.7	Behavioral and Community Health Sciences	PhD		X	Fall 2021, Spring 2021		-	In person	https://www.publichealth.pitt.edu/behavioral-and-community-health-sciences/academics/phd	https://web.archive.org/web/20200823225758/https://www.publichealth.pitt.edu/home/admissions-aid/how-to-apply/requirements	X		X					X
University of Pittsburgh	Pittsburgh, PA	13 (tie)	3.7	Biostatistics	PhD		X	Fall 2021, Spring 2021		recommended	In person	https://www.publichealth.pitt.edu/biostatistics-phd	https://web.archive.org/web/20200823225758/https://www.publichealth.pitt.edu/home/admissions-aid/how-to-apply/requirements	X		X	X
University of Pittsburgh	Pittsburgh, PA	13 (tie)	3.7	Environmental and Occupational Health	PhD		X	Fall 2021, Spring 2021		optional	In person	https://www.publichealth.pitt.edu/environmental-and-occupational-health/academics/phd	https://web.archive.org/web/20200823225758/https://www.publichealth.pitt.edu/home/admissions-aid/how-to-apply/requirements	X		X			X
University of Pittsburgh	Pittsburgh, PA	13 (tie)	3.7	Epidemiology	PhD		X	Fall 2021, Spring 2021		optional	In person	https://www.publichealth.pitt.edu/epidemiology/academics/phd	https://web.archive.org/web/20200823225758/https://www.publichealth.pitt.edu/home/admissions-aid/how-to-apply/requirements	X		X		X
University of Pittsburgh	Pittsburgh, PA	13 (tie)	3.7	Health Services Research and Policy	PhD				X		In person	https://www.publichealth.pitt.edu/health-policy-and-management/academics/phd		X		X				X
University of Pittsburgh	Pittsburgh, PA	13 (tie)	3.7	Human Genetics	PhD		X	Fall 2021, Spring 2021		optional	In person	https://www.publichealth.pitt.edu/human-genetics/academics/phd	https://web.archive.org/web/20200826214201/https://www.publichealth.pitt.edu/home/admissions-aid/how-to-apply/requirements	X		X
University of Pittsburgh	Pittsburgh, PA	13 (tie)	3.7	Infectious Diseases and Microbiology	PhD		X	Fall 2021, Spring 2021		optional	In person	https://www.publichealth.pitt.edu/infectious-diseases-and-microbiology/academics/phd	https://web.archive.org/web/20200823225758/https://www.publichealth.pitt.edu/home/admissions-aid/how-to-apply/requirements	X		X
Yale University	New Haven, CT	15	3.6	Applied Analytic Methods and Epidemiology	MPH				X		Online	https://publichealth.yale.edu/education/degrees/executive/		X	X			X
Yale University	New Haven, CT	15	3.6	Biostatistics	MPH		X	Fall 2021		optional	In person	https://publichealth.yale.edu/education/degrees/mph/biostatistics/	https://web.archive.org/web/20200823233724/https://publichealth.yale.edu/admissions_alumni/admissions/apply/	X	X		X
Yale University	New Haven, CT	15	3.6	Chronic Disease Epidemiology	MPH		X	Fall 2021		optional	In person	https://publichealth.yale.edu/education/degrees/mph/cde/	https://web.archive.org/web/20200823233724/https://publichealth.yale.edu/admissions_alumni/admissions/apply/	X	X			X
Yale University	New Haven, CT	15	3.6	Environmental Health Sciences	MPH		X	Fall 2021		optional	In person	https://publichealth.yale.edu/education/degrees/mph/ehs/	https://web.archive.org/web/20200823233724/https://publichealth.yale.edu/admissions_alumni/admissions/apply/	X	X				X
Yale University	New Haven, CT	15	3.6	Environmental Health Sciences	MPH				X		Online	https://publichealth.yale.edu/education/degrees/executive/		X	X				X
Yale University	New Haven, CT	15	3.6	Epidemiology of Microbial Diseases	MPH		X	Fall 2021		optional	In person	https://publichealth.yale.edu/education/degrees/mph/emd/	https://web.archive.org/web/20200823233724/https://publichealth.yale.edu/admissions_alumni/admissions/apply/	X	X			X
Yale University	New Haven, CT	15	3.6	Health Care Management	MPH		X	Fall 2021		optional	In person	https://publichealth.yale.edu/education/degrees/mph/hcm/	https://web.archive.org/web/20200823233724/https://publichealth.yale.edu/admissions_alumni/admissions/apply/	X	X					X
Yale University	New Haven, CT	15	3.6	Health Informatics	MPH				X		Online	https://publichealth.yale.edu/education/degrees/executive/		X	X
Yale University	New Haven, CT	15	3.6	Health Policy	MPH		X	Fall 2021		optional	In person	https://publichealth.yale.edu/education/degrees/mph/hp/	https://web.archive.org/web/20200823233724/https://publichealth.yale.edu/admissions_alumni/admissions/apply/	X	X					X
Yale University	New Haven, CT	15	3.6	Social and Behavioral Sciences	MPH		X	Fall 2021		optional	In person	https://publichealth.yale.edu/education/degrees/mph/sbs/	https://web.archive.org/web/20200823233724/https://publichealth.yale.edu/admissions_alumni/admissions/apply/	X	X						X
Yale University	New Haven, CT	15	3.6	Biostatistics	MS				X		In person	https://publichealth.yale.edu/education/degrees/ms/biostatistics/		X	X		X
Yale University	New Haven, CT	15	3.6	Chronic Disease Epidemiology	MS				X		In person	https://publichealth.yale.edu/education/degrees/ms/cde/		X	X			X
Yale University	New Haven, CT	15	3.6	Epidemiology of Infectious Diseases	MS				X		In person	https://publichealth.yale.edu/education/degrees/ms/eid/		X	X			X
Yale University	New Haven, CT	15	3.6	Health Informatics	MS				X		In person	https://publichealth.yale.edu/education/degrees/ms/informatics/		X	X
Yale University	New Haven, CT	15	3.6	Biostatistics	PhD				X		In person	https://publichealth.yale.edu/education/degrees/phd/biostatistics/		X		X	X
Yale University	New Haven, CT	15	3.6	Chronic Disease Epidemiology	PhD				X		In person	https://publichealth.yale.edu/education/degrees/phd/cde/		X		X		X
Yale University	New Haven, CT	15	3.6	Environmental Health Sciences	PhD				X		In person	https://publichealth.yale.edu/education/degrees/phd/ehs/		X		X			X
Yale University	New Haven, CT	15	3.6	Epidemiology of Microbial Diseases	PhD				X		In person	https://publichealth.yale.edu/education/degrees/phd/emd/		X		X		X
Yale University	New Haven, CT	15	3.6	Health Policy and Management	PhD				X		In person	https://publichealth.yale.edu/education/degrees/phd/hpm/		X		X				X
Yale University	New Haven, CT	15	3.6	Social and Behavioral Sciences	PhD				X		In person	https://publichealth.yale.edu/education/degrees/phd/sbs/		X		X					X
University of South Florida	Tampa, FL	16	3.4	Advanced Practice Leadership in Public Health	DrPH	X				optional	In person	https://health.usf.edu/publichealth/apply/graduate-admissions/drph-aplph	https://archive.vn/amjrP	X		X
University of South Florida	Tampa, FL	16	3.4	Public Health and Clinical Laboratory Science and Practice	DrPH	X				optional	In person	https://health.usf.edu/publichealth/apply/graduate-admissions/drph-phclsp	https://archive.vn/amjrP	X		X
University of South Florida	Tampa, FL	16	3.4	Health Administration	MHA	X				optional	In person	https://health.usf.edu/publichealth/apply/graduate-admissions/mha	https://archive.vn/amjrP	X	X
University of South Florida	Tampa, FL	16	3.4	Applied Biostatistics	MPH	X				optional	In person	https://health.usf.edu/publichealth/apply/graduate-admissions/mph-ab	https://archive.vn/amjrP	X	X		X
University of South Florida	Tampa, FL	16	3.4	Behavioral Health	MPH	X				optional	In person	https://health.usf.edu/publichealth/apply/graduate-admissions/behavioral-health-mph	https://archive.vn/amjrP	X	X						X
University of South Florida	Tampa, FL	16	3.4	Environmental and Occupational Health	MPH	X				optional	In person	https://health.usf.edu/publichealth/apply/graduate-admissions/MPH-EOH	https://archive.vn/amjrP	X	X
University of South Florida	Tampa, FL	16	3.4	Epidemiology	MPH	X				optional	In person	https://confluence.usf.edu/display/COPHHB/MPH+Epidemiology	https://archive.vn/amjrP	X	X			X
University of South Florida	Tampa, FL	16	3.4	Epidemiology	MPH	X				optional	Online	https://health.usf.edu/publichealth/apply/graduate-admissions/epidemiology-online	https://archive.vn/amjrP	X	X			X
University of South Florida	Tampa, FL	16	3.4	Global Communicable Disease	MPH	X				optional	In person	https://health.usf.edu/publichealth/apply/global-communicable-diseases-mph	https://archive.vn/amjrP	X	X
University of South Florida	Tampa, FL	16	3.4	Global Disaster Management, Humanitarian Relief and Homeland Security	MPH	X				optional	Online	https://health.usf.edu/publichealth/apply/graduate-admissions/global-disaster-management-online	https://archive.vn/amjrP	X	X					X
University of South Florida	Tampa, FL	16	3.4	Global Health Practice	MPH	X				optional	In person	https://health.usf.edu/publichealth/apply/Global%20Health%20Practice	https://archive.vn/amjrP	X	X
University of South Florida	Tampa, FL	16	3.4	Health Care Organizations and Management	MPH	X				optional	In person	https://health.usf.edu/publichealth/apply/Health%20Care%20Organizations%20and%20Management	https://archive.vn/amjrP	X	X					X
University of South Florida	Tampa, FL	16	3.4	Health Policies and Programs	MPH	X				optional	In person	https://health.usf.edu/publichealth/apply/Health%20Policies%20and%20Programs	https://archive.vn/amjrP	X	X					X
University of South Florida	Tampa, FL	16	3.4	Health, Safety and Environment	MPH	X				optional	Online	https://health.usf.edu/publichealth/apply/graduate-admissions/health-safety-environment-online	https://archive.vn/amjrP	X	X				X
University of South Florida	Tampa, FL	16	3.4	Infection Control	MPH	X				optional	Online	https://health.usf.edu/publichealth/apply/graduate-admissions/infection-control-online	https://archive.vn/amjrP	X	X
University of South Florida	Tampa, FL	16	3.4	Maternal and Child Health	MPH	X				optional	In person	https://health.usf.edu/publichealth/apply/Maternal%20and%20Child%20Health%20MPH	https://archive.vn/amjrP	X	X
University of South Florida	Tampa, FL	16	3.4	Nutrition and Dietetics	MPH	X				optional	Online	https://health.usf.edu/publichealth/apply/graduate-admissions/nutrition-and-dietetics-mph	https://archive.vn/amjrP	X	X
University of South Florida	Tampa, FL	16	3.4	Public Health Education	MPH	X				optional	In person	https://health.usf.edu/publichealth/apply/Public%20Health%20Education%20MPH	https://archive.vn/amjrP	X	X						X
University of South Florida	Tampa, FL	16	3.4	Public Health Practice	MPH	X				optional	Online	https://health.usf.edu/publichealth/apply/graduate-admissions/public-health-practice-online	https://archive.vn/amjrP	X	X
University of South Florida	Tampa, FL	16	3.4	Social Marketing	MPH	X				optional	Online	https://health.usf.edu/publichealth/apply/graduate-admissions/social-marketing-online	https://archive.vn/amjrP	X	X						X
University of South Florida	Tampa, FL	16	3.4	Behavioral Health	MSPH				X		In person	https://health.usf.edu/publichealth/apply/graduate-admissions/behavioral-health-msph		X	X						X
University of South Florida	Tampa, FL	16	3.4	Environmental and Occupational Health	MSPH				X		In person	https://health.usf.edu/publichealth/apply/graduate-admissions/msph-eoh		X	X
University of South Florida	Tampa, FL	16	3.4	Epidemiology	MSPH				X		In person	https://health.usf.edu/publichealth/apply/epidemiology-msph		X	X			X
University of South Florida	Tampa, FL	16	3.4	Genetic Counseling	MSPH				X		In person	https://health.usf.edu/publichealth/apply/graduate-admissions/genetic-counseling		X	X
University of South Florida	Tampa, FL	16	3.4	Genomics	MSPH				X		In person	https://health.usf.edu/publichealth/apply/graduate-admissions/msph-genomics		X	X
University of South Florida	Tampa, FL	16	3.4	Global Communicable Disease	MSPH				X		In person	https://health.usf.edu/publichealth/apply/global-communicable-diseases-msph		X	X
University of South Florida	Tampa, FL	16	3.4	Maternal and Child Health	MSPH				X		In person	https://health.usf.edu/publichealth/apply/maternal-and-child-health-msph		X	X
University of South Florida	Tampa, FL	16	3.4	Occupational Exposure Science	MSPH				X		In person	https://health.usf.edu/publichealth/apply/graduate-admissions/occupational-exposure-science		X	X				X
University of South Florida	Tampa, FL	16	3.4	Public Health Education	MSPH				X		In person	https://health.usf.edu/publichealth/apply/public-health-education-msph		X	X						X
University of South Florida	Tampa, FL	16	3.4	Biostatistics	PhD	X				optional	In person	https://health.usf.edu/publichealth/apply/Biostatistics%20PhD	https://archive.vn/amjrP	X		X	X
University of South Florida	Tampa, FL	16	3.4	Community and Family Health	PhD	X				optional	In person	https://health.usf.edu/publichealth/apply/Community%20and%20Family%20Health%20PhD	https://archive.vn/amjrP	X		X					X
University of South Florida	Tampa, FL	16	3.4	Environmental and Occupational Health	PhD	X				optional	In person	https://health.usf.edu/publichealth/apply/Environmental%20and%20Occupational%20Health%20PhD	https://archive.vn/amjrP	X		X
University of South Florida	Tampa, FL	16	3.4	Epidemiology	PhD	X				optional	In person	https://health.usf.edu/publichealth/apply/Epidemiology%20PhD	https://archive.vn/amjrP	X		X		X
University of South Florida	Tampa, FL	16	3.4	Global Communicable Disease	PhD	X				optional	In person	https://health.usf.edu/publichealth/apply/graduate-admissions/phd-gcd	https://archive.vn/amjrP	X		X
University of South Florida	Tampa, FL	16	3.4	Health Services Research	PhD	X				optional	In person	https://health.usf.edu/publichealth/apply/Health%20Services%20Research%20PhD	https://archive.vn/amjrP	X		X				X
Brown University	Providence, RI	17 (tie)	3.3	Epidemiology	MPH		X	Fall 2021		optional	In person	https://www.brown.edu/academics/public-health/mph/curriculum	https://web.archive.org/web/20200823181756/https://www.brown.edu/academics/public-health/admissions/requirements	X	X			X
Brown University	Providence, RI	17 (tie)	3.3	Generalist	MPH		X	Fall 2021		optional	In person	https://www.brown.edu/academics/public-health/mph/curriculum	https://web.archive.org/web/20200823181756/https://www.brown.edu/academics/public-health/admissions/requirements	X	X
Brown University	Providence, RI	17 (tie)	3.3	Global Health	MPH		X	Fall 2021		optional	In person	https://www.brown.edu/academics/public-health/mph/curriculum	https://web.archive.org/web/20200823181756/https://www.brown.edu/academics/public-health/admissions/requirements	X	X
Brown University	Providence, RI	17 (tie)	3.3	Health Behavior	MPH		X	Fall 2021		optional	In person	https://www.brown.edu/academics/public-health/mph/curriculum	https://web.archive.org/web/20200823181756/https://www.brown.edu/academics/public-health/admissions/requirements	X	X						X
Brown University	Providence, RI	17 (tie)	3.3	Health Services	MPH		X	Fall 2021		optional	In person	https://www.brown.edu/academics/public-health/mph/curriculum	https://web.archive.org/web/20200823181756/https://www.brown.edu/academics/public-health/admissions/requirements	X	X					X
Brown University	Providence, RI	17 (tie)	3.3	Maternal and Child Health	MPH		X	Fall 2021		optional	In person	https://www.brown.edu/academics/public-health/mph/curriculum	https://web.archive.org/web/20200823181756/https://www.brown.edu/academics/public-health/admissions/requirements	X	X
Brown University	Providence, RI	17 (tie)	3.3	Mindfulness	MPH		X	Fall 2021		optional	In person	https://www.brown.edu/academics/public-health/mph/curriculum	https://web.archive.org/web/20200823181756/https://www.brown.edu/academics/public-health/admissions/requirements	X	X
Brown University	Providence, RI	17 (tie)	3.3	Biostatistics	MS		X	Fall 2021		optional	In person	https://www.brown.edu/academics/public-health/biostats/academics/masters-program	https://web.archive.org/web/20200823181756/https://www.brown.edu/academics/public-health/admissions/requirements	X	X		X
Brown University	Providence, RI	17 (tie)	3.3	Clinical and Translational Research	MS		X	Fall 2021		optional	In person	https://www.brown.edu/academics/public-health/ctr/	https://web.archive.org/web/20200823181756/https://www.brown.edu/academics/public-health/admissions/requirements	X	X
Brown University	Providence, RI	17 (tie)	3.3	Global Public Health	MS		X	Fall 2021		optional	In person	https://www.brown.edu/academics/public-health/global/	https://web.archive.org/web/20200823181756/https://www.brown.edu/academics/public-health/admissions/requirements	X	X
Brown University	Providence, RI	17 (tie)	3.3	Behavioral and Social Health Sciences	PhD		X	Fall 2021		optional	In person	https://www.brown.edu/academics/public-health/bss/degree-programs/doctoral-program	https://web.archive.org/web/20200823181756/https://www.brown.edu/academics/public-health/admissions/requirements	X		X					X
Brown University	Providence, RI	17 (tie)	3.3	Biostatistics	PhD		X	Fall 2021		optional	In person	https://www.brown.edu/academics/public-health/biostats/academics/doctoral-program	https://web.archive.org/web/20200823181756/https://www.brown.edu/academics/public-health/admissions/requirements	X		X	X
Brown University	Providence, RI	17 (tie)	3.3	Epidemiology	PhD		X	Fall 2021		optional	In person	https://www.brown.edu/academics/public-health/epi/academics/doctoral-program	https://web.archive.org/web/20200823181756/https://www.brown.edu/academics/public-health/admissions/requirements	X		X		X
Brown University	Providence, RI	17 (tie)	3.3	Health Services Research	PhD		X	Fall 2021		optional	In person	https://www.brown.edu/academics/public-health/hspp/doctoral-program	https://web.archive.org/web/20200823181756/https://www.brown.edu/academics/public-health/admissions/requirements	X		X				X
Washington University in St. Louis	St. Louis, MO	17 (tie)	3.3	Epidemiology and Biostatistics	MPH	X				-	In person	https://brownschool.wustl.edu/Academics/Master-of-Public-Health/Pages/Epidemiology-Biostatistics-Specialization.aspx	https://web.archive.org/web/20200920031951/https://brownschool.wustl.edu/Academics/Master-of-Public-Health/MPH-Application-Instructions/Pages/default.aspx	X	X		X	X
Washington University in St. Louis	St. Louis, MO	17 (tie)	3.3	Generalist	MPH	X				-	In person	https://brownschool.wustl.edu/Academics/Master-of-Public-Health/Pages/MPH-Generalist-Track.aspx	https://web.archive.org/web/20200920031951/https://brownschool.wustl.edu/Academics/Master-of-Public-Health/MPH-Application-Instructions/Pages/default.aspx	X	X
Washington University in St. Louis	St. Louis, MO	17 (tie)	3.3	Global Health	MPH	X				-	In person	https://brownschool.wustl.edu/Academics/Master-of-Public-Health/Pages/Global-Health-Specialization.aspx	https://web.archive.org/web/20200920031951/https://brownschool.wustl.edu/Academics/Master-of-Public-Health/MPH-Application-Instructions/Pages/default.aspx	X	X
Washington University in St. Louis	St. Louis, MO	17 (tie)	3.3	Health Policy Analysis	MPH	X				-	In person	https://brownschool.wustl.edu/Academics/Master-of-Public-Health/Pages/Health-Policy-Analysis-Specialization.aspx	https://web.archive.org/web/20200920031951/https://brownschool.wustl.edu/Academics/Master-of-Public-Health/MPH-Application-Instructions/Pages/default.aspx	X	X					X
Washington University in St. Louis	St. Louis, MO	17 (tie)	3.3	​Mental and Behavioral Health	MPH	X				-	In person	https://brownschool.wustl.edu/Academics/Master-of-Public-Health/Pages/Mental-and-Behavioral-Health-Specialization.aspx	https://web.archive.org/web/20200920031951/https://brownschool.wustl.edu/Academics/Master-of-Public-Health/MPH-Application-Instructions/Pages/default.aspx	X	X						X
Washington University in St. Louis	St. Louis, MO	17 (tie)	3.3	Urban Design	MPH	X				-	In person	https://brownschool.wustl.edu/Academics/Master-of-Public-Health/Pages/Urban-Design-Specialization.aspx	https://web.archive.org/web/20200920031951/https://brownschool.wustl.edu/Academics/Master-of-Public-Health/MPH-Application-Instructions/Pages/default.aspx	X	X
Washington University in St. Louis	St. Louis, MO	17 (tie)	3.3	Public Health Sciences	PhD			Fall 2020		optional	In person	https://brownschool.wustl.edu/Academics/PhD-in-Public-Health-Sciences/Pages/default.aspx	https://web.archive.org/web/20200920032326/https://brownschool.wustl.edu/Academics/PhD-in-Public-Health-Sciences/Pages/PhD-Public-Health-Sciences-Application-Instructions.aspx	X		X
Drexel University	Philadelphia, PA	19 (tie)	3.2	Health Management and Policy	DrPH				X		In person	https://drexel.edu/dornsife/academics/degrees/drph-in-health-management-and-policy/		X		X				X
Drexel University	Philadelphia, PA	19 (tie)	3.2	Community Health and Prevention	MPH	X				-	In person	https://drexel.edu/dornsife/academics/departments/community-health-prevention/	https://web.archive.org/web/20200826230855/https://drexel.edu/dornsife/admissions/apply/gre-not-required/	X	X						X
Drexel University	Philadelphia, PA	19 (tie)	3.2	Environmental and Occupational Health	MPH	X				-	In person	https://drexel.edu/dornsife/academics/departments/environmental-occupational-health/	https://web.archive.org/web/20200826230855/https://drexel.edu/dornsife/admissions/apply/gre-not-required/	X	X
Drexel University	Philadelphia, PA	19 (tie)	3.2	Epidemiology	MPH	X				-	In person	https://drexel.edu/dornsife/academics/departments/epidemiology-biostatistics/	https://web.archive.org/web/20200826230855/https://drexel.edu/dornsife/admissions/apply/gre-not-required/	X	X			X
Drexel University	Philadelphia, PA	19 (tie)	3.2	Epidemiology	MPH	X				-	Online	https://drexel.edu/dornsife/academics/degrees/online-mph-in-epidemiology/	https://web.archive.org/web/20200826230855/https://drexel.edu/dornsife/admissions/apply/gre-not-required/	X	X			X
Drexel University	Philadelphia, PA	19 (tie)	3.2	Global Health	MPH	X				-	Online	https://drexel.edu/dornsife/academics/degrees/online-mph-in-global-health/	https://web.archive.org/web/20200826230855/https://drexel.edu/dornsife/admissions/apply/gre-not-required/	X	X
Drexel University	Philadelphia, PA	19 (tie)	3.2	Health Management and Policy	MPH	X				-	In person	https://drexel.edu/dornsife/academics/departments/health-management-policy/	https://web.archive.org/web/20200826230855/https://drexel.edu/dornsife/admissions/apply/gre-not-required/	X	X					X
Drexel University	Philadelphia, PA	19 (tie)	3.2	Public Health	MPH	X				-	Hybrid	https://drexel.edu/dornsife/academics/degrees/executive-mph-degree/	https://web.archive.org/web/20200826230855/https://drexel.edu/dornsife/admissions/apply/gre-not-required/	X	X
Drexel University	Philadelphia, PA	19 (tie)	3.2	Urban Health	MPH	X				-	Online	https://drexel.edu/dornsife/academics/degrees/online-mph-in-urban-health/	https://web.archive.org/web/20200826230855/https://drexel.edu/dornsife/admissions/apply/gre-not-required/	X	X
Drexel University	Philadelphia, PA	19 (tie)	3.2	Biostatistics	MS	X				-	In person	https://drexel.edu/dornsife/academics/degrees/ms-degree-in-biostatistics/	https://web.archive.org/web/20200826230855/https://drexel.edu/dornsife/admissions/apply/gre-not-required/	X	X		X
Drexel University	Philadelphia, PA	19 (tie)	3.2	Environmental and Occupational Health Sciences	MS	X				-	In person	https://drexel.edu/dornsife/academics/degrees/ms-degree-environmental-occupational-health-sciences/	https://web.archive.org/web/20200826230855/https://drexel.edu/dornsife/admissions/apply/gre-not-required/	X	X				X
Drexel University	Philadelphia, PA	19 (tie)	3.2	Epidemiology	MS	X				-	In person	https://drexel.edu/dornsife/academics/degrees/ms-degree-in-epidemiology/	https://web.archive.org/web/20200826230855/https://drexel.edu/dornsife/admissions/apply/gre-not-required/	X	X			X
Drexel University	Philadelphia, PA	19 (tie)	3.2	Global Health	MS	X				-	Online	https://drexel.edu/dornsife/academics/degrees/online-ms-in-global-health/	https://web.archive.org/web/20200826230855/https://drexel.edu/dornsife/admissions/apply/gre-not-required/	X	X
Drexel University	Philadelphia, PA	19 (tie)	3.2	Population Health Sciences	MS	X				-	In person	https://drexel.edu/dornsife/academics/degrees/ms-population-health-science/	https://web.archive.org/web/20200826230855/https://drexel.edu/dornsife/admissions/apply/gre-not-required/	X	X
Drexel University	Philadelphia, PA	19 (tie)	3.2	Public Health Ethics	MS	X				-	In person	https://drexel.edu/dornsife/academics/degrees/ms-public-health-ethics/	https://web.archive.org/web/20200826230855/https://drexel.edu/dornsife/admissions/apply/gre-not-required/	X	X
Drexel University	Philadelphia, PA	19 (tie)	3.2	Biostatistics	PhD				X		In person	https://drexel.edu/dornsife/academics/degrees/phd-biostatistics/		X		X	X
Drexel University	Philadelphia, PA	19 (tie)	3.2	Community Health and Prevention	PhD				X		In person	https://drexel.edu/dornsife/academics/degrees/phd-community-health-and-prevention/		X		X					X
Drexel University	Philadelphia, PA	19 (tie)	3.2	Environmental and Occupational Health	PhD				X		In person	https://drexel.edu/dornsife/academics/degrees/phd-degree-in-environmental-and-occupational-health/		X		X			X
Drexel University	Philadelphia, PA	19 (tie)	3.2	Epidemiology	PhD				X		In person	https://drexel.edu/dornsife/academics/degrees/phd-degree-in-epidemiology/		X		X		X
Drexel University	Philadelphia, PA	19 (tie)	3.2	Health Services Research and Policy	PhD				X		In person	https://drexel.edu/dornsife/academics/degrees/phd-degree-in-health-services-research-and-policy/		X		X				X
University of Alabama--Birmingham	Birmingham, AL	19 (tie)	3.2	Biostatistics	DrPH				X		In person	https://www.uab.edu/soph/home/graduate/programs/drph-biostatistics		X		X	X
University of Alabama--Birmingham	Birmingham, AL	19 (tie)	3.2	Health Care Organization and Policy	DrPH				X		In person	https://www.uab.edu/soph/home/graduate/programs/drph-hcop		X		X				X
University of Alabama--Birmingham	Birmingham, AL	19 (tie)	3.2	Maternal and Child Health Policy	DrPH				X		In person	https://www.uab.edu/soph/home/graduate/programs/drph-maternal-and-child-health		X		X				X
University of Alabama--Birmingham	Birmingham, AL	19 (tie)	3.2	Outcomes Research	DrPH				X		In person	https://www.uab.edu/soph/home/graduate/programs/drph-outcomes-research		X		X
University of Alabama--Birmingham	Birmingham, AL	19 (tie)	3.2	Environmental and Occupational Health	MPH	X				optional	In person, online	https://www.uab.edu/soph/home/graduate/programs/mph-environmental-and-occupational-health	https://web.archive.org/web/20200903202318/https://www.uab.edu/soph/home/apply/graduate	X	X
University of Alabama--Birmingham	Birmingham, AL	19 (tie)	3.2	Epidemiology	MPH	X				optional	In person, online	https://www.uab.edu/soph/home/graduate/programs/mph-epidemiology	https://web.archive.org/web/20200903202318/https://www.uab.edu/soph/home/apply/graduate	X	X			X
University of Alabama--Birmingham	Birmingham, AL	19 (tie)	3.2	Health Behavior	MPH	X				optional	In person, online	https://www.uab.edu/soph/home/graduate/programs/mph-health-behavior	https://web.archive.org/web/20200903202318/https://www.uab.edu/soph/home/apply/graduate	X	X						X
University of Alabama--Birmingham	Birmingham, AL	19 (tie)	3.2	Health Care Organization	MPH	X				optional	In person, online	https://www.uab.edu/soph/home/graduate/programs/mph-hco	https://web.archive.org/web/20200903202318/https://www.uab.edu/soph/home/apply/graduate	X	X
University of Alabama--Birmingham	Birmingham, AL	19 (tie)	3.2	Health Care Policy	MPH	X				optional	In person, online	https://www.uab.edu/soph/home/graduate/programs/mph-health-policy	https://web.archive.org/web/20200903202318/https://www.uab.edu/soph/home/apply/graduate	X	X					X
University of Alabama--Birmingham	Birmingham, AL	19 (tie)	3.2	Maternal and Child Health Policy and Leadership	MPH	X				optional	In person, online	https://www.uab.edu/soph/home/graduate/programs/mph-mch	https://web.archive.org/web/20200903202318/https://www.uab.edu/soph/home/apply/graduate	X	X					X
University of Alabama--Birmingham	Birmingham, AL	19 (tie)	3.2	Population Health	MPH	X				optional	In person, online	https://www.uab.edu/soph/home/graduate/programs/mph-ph	https://web.archive.org/web/20200903202318/https://www.uab.edu/soph/home/apply/graduate	X	X
University of Alabama--Birmingham	Birmingham, AL	19 (tie)	3.2	Biostatistics	MS	X				optional	In person	https://www.uab.edu/soph/home/graduate/programs/ms-biostatistics	https://web.archive.org/web/20200903202318/https://www.uab.edu/soph/home/apply/graduate	X	X		X
University of Alabama--Birmingham	Birmingham, AL	19 (tie)	3.2	Applied Epidemiology	MSPH	X				optional	In person	https://www.uab.edu/soph/home/graduate/programs/msph-applied-epidemiology	https://web.archive.org/web/20200903202318/https://www.uab.edu/soph/home/apply/graduate	X	X			X
University of Alabama--Birmingham	Birmingham, AL	19 (tie)	3.2	Biostatistics	MSPH	X				optional	In person	https://www.uab.edu/soph/home/graduate/programs/msph-biostatistics	https://web.archive.org/web/20200903202318/https://www.uab.edu/soph/home/apply/graduate	X	X		X
University of Alabama--Birmingham	Birmingham, AL	19 (tie)	3.2	Environmental and Occupational Health Science	MSPH	X				optional	In person	https://www.uab.edu/soph/home/graduate/programs/msph-eohs	https://web.archive.org/web/20200903202318/https://www.uab.edu/soph/home/apply/graduate	X	X				X
University of Alabama--Birmingham	Birmingham, AL	19 (tie)	3.2	Industrial Hygiene	MSPH	X				optional	In person	https://www.uab.edu/soph/home/graduate/programs/msph-industrial-hygiene	https://web.archive.org/web/20200903202318/https://www.uab.edu/soph/home/apply/graduate	X	X				X
University of Alabama--Birmingham	Birmingham, AL	19 (tie)	3.2	Outcomes Research	MSPH	X				optional	Online	https://www.uab.edu/soph/home/graduate/programs/msph-outcomes-research	https://web.archive.org/web/20200903202318/https://www.uab.edu/soph/home/apply/graduate	X	X
University of Alabama--Birmingham	Birmingham, AL	19 (tie)	3.2	Biostatistics	PhD				X		In person	https://www.uab.edu/soph/home/graduate/programs/phd-biostatistics		X		X	X
University of Alabama--Birmingham	Birmingham, AL	19 (tie)	3.2	Environmental Health Sciences	PhD				X		In person	https://www.uab.edu/soph/home/graduate/programs/phd-ehs		X		X			X
University of Alabama--Birmingham	Birmingham, AL	19 (tie)	3.2	Epidemiology	PhD				X		In person	https://www.uab.edu/soph/home/graduate/programs/phd-epidemiology		X		X		X
University of Alabama--Birmingham	Birmingham, AL	19 (tie)	3.2	Health Education and Health Promotion	PhD				X		In person	https://www.uab.edu/soph/home/graduate/programs/phd-health-education-health-promotion		X		X					X
University of Illinois--Chicago	Chicago, IL	19 (tie)	3.2	Public Health Leadership	DrPH	X				recommended	In person	https://publichealth.uic.edu/academics/public-health-degrees/drph/	https://web.archive.org/web/20200830173533/https://publichealth.uic.edu/academics/public-health-degrees/drph/application-process/	X		X
University of Illinois--Chicago	Chicago, IL	19 (tie)	3.2	Healthcare Administration	MHA		X	Fall 2021		optional	In person	https://publichealth.uic.edu/academics/public-health-degrees/master-healthcare-administration/	https://archive.vn/O3wN7	X	X
University of Illinois--Chicago	Chicago, IL	19 (tie)	3.2	Biostatistics	MPH		X	Fall 2021		optional	In person	https://publichealth.uic.edu/academics/public-health-degrees/master-public-health/biostatistics-mph/	https://archive.vn/8bG09	X	X		X
University of Illinois--Chicago	Chicago, IL	19 (tie)	3.2	Community Health Sciences	MPH		X	Fall 2021		optional	In person	https://publichealth.uic.edu/academics/public-health-degrees/master-public-health/mph-community-health-sciences/	https://archive.vn/6xzRK	X	X						X
University of Illinois--Chicago	Chicago, IL	19 (tie)	3.2	Environmental and Occupational Health Sciences	MPH		X	Fall 2021		optional	In person	https://publichealth.uic.edu/academics/public-health-degrees/master-public-health/environmental-occupational-health-mph/	https://archive.vn/T97w3	X	X				X
University of Illinois--Chicago	Chicago, IL	19 (tie)	3.2	Epidemiology	MPH		X	Fall 2021		optional	In person	https://publichealth.uic.edu/academics/public-health-degrees/master-public-health/mph-epidemiology/	https://archive.vn/At17v	X	X			X
University of Illinois--Chicago	Chicago, IL	19 (tie)	3.2	Health Policy and Administration	MPH		X	Fall 2021		optional	In person	https://publichealth.uic.edu/academics/public-health-degrees/master-public-health/mph-health-policy-and-administration/	https://archive.vn/gNWHX	X	X					X
University of Illinois--Chicago	Chicago, IL	19 (tie)	3.2	Maternal and Child Health	MPH		X	Fall 2021		optional	In person	https://publichealth.uic.edu/academics/public-health-degrees/master-public-health/mph-maternal-child-health/	https://archive.vn/9Wwu5	X	X
University of Illinois--Chicago	Chicago, IL	19 (tie)	3.2	Maternal and Child Health Epidemiology	MPH		X	Fall 2021		optional	In person	https://publichealth.uic.edu/academics/public-health-degrees/master-public-health/mph-maternal-child-health-epidemiology/	https://archive.vn/Co6Sa	X	X			X
University of Illinois--Chicago	Chicago, IL	19 (tie)	3.2	Public Health Informatics	MPH		X	Fall 2021		optional	Online	https://publichealth.uic.edu/academics/public-health-degrees/master-public-health/mph-public-health-informatics/	https://archive.vn/lQ0uH	X	X
University of Illinois--Chicago	Chicago, IL	19 (tie)	3.2	Big Health Data Analytics	MS		X	Fall 2021		optional	In person	https://publichealth.uic.edu/academics/public-health-degrees/master-science-degrees/ms-health-analytics/	https://archive.vn/9Agux	X	X
University of Illinois--Chicago	Chicago, IL	19 (tie)	3.2	Biostatistics	MS		X	Fall 2021		optional	In person	https://publichealth.uic.edu/academics/public-health-degrees/master-science-degrees/ms-biostatistics/	https://archive.vn/1gJR5	X	X		X
University of Illinois--Chicago	Chicago, IL	19 (tie)	3.2	Cancer Epidemiology	MS		X	Fall 2021		optional	In person	https://publichealth.uic.edu/academics/public-health-degrees/master-science-degrees/ms-cancer-epidemiology/	https://archive.vn/qiB8J	X	X			X
University of Illinois--Chicago	Chicago, IL	19 (tie)	3.2	Clinical and Translational Science	MS		X	Fall 2021		optional	In person	https://publichealth.uic.edu/academics/public-health-degrees/master-science-degrees/ms-clinical-and-translational-science/	https://archive.vn/H1Rkw	X	X
University of Illinois--Chicago	Chicago, IL	19 (tie)	3.2	Environmental and Occupational Health Sciences: Industrial Hygiene	MS		X	Fall 2021		optional	In person	https://publichealth.uic.edu/environmental-occupational-health-sciences/industrial-hygiene/	https://archive.vn/bw6Ii	X	X				X
University of Illinois--Chicago	Chicago, IL	19 (tie)	3.2	Environmental and Occupational Health Sciences: Occupational Safety	MS		X	Fall 2021		optional	In person	https://publichealth.uic.edu/environmental-occupational-health-sciences/occupational-safety-concentration/	https://archive.vn/bw6Ii	X	X				X
University of Illinois--Chicago	Chicago, IL	19 (tie)	3.2	Epidemiology	MS		X	Fall 2021		optional	In person	https://publichealth.uic.edu/academics/public-health-degrees/master-science-degrees/ms-epidemiology/	https://archive.vn/V1Flw	X	X			X
University of Illinois--Chicago	Chicago, IL	19 (tie)	3.2	Health Policy and Administration	MS		X	Fall 2021		optional	In person	https://publichealth.uic.edu/academics/public-health-degrees/master-science-degrees/ms-health-policy-administration/	https://archive.vn/gNWHX	X	X					X
University of Illinois--Chicago	Chicago, IL	19 (tie)	3.2	Occupational and Environmental Epidemiology	MS		X	Fall 2021		optional	In person	https://publichealth.uic.edu/academics/public-health-degrees/master-science-degrees/ms-occupational-environmental-epidemiology/	https://archive.vn/feMpZ	X	X			X	X
University of Illinois--Chicago	Chicago, IL	19 (tie)	3.2	Public Health Informatics	MS		X	Fall 2021		optional	In person	https://publichealth.uic.edu/academics/public-health-degrees/master-science-degrees/ms-public-health-informatics/	https://archive.vn/lQ0uH	X	X
University of Illinois--Chicago	Chicago, IL	19 (tie)	3.2	Biostatistics	PhD		X	Fall 2021		recommended	In person	https://publichealth.uic.edu/academics/public-health-degrees/phd-public-health-degrees/phd-biostatistics/	https://archive.vn/TaDUH	X		X	X
University of Illinois--Chicago	Chicago, IL	19 (tie)	3.2	Cancer Epidemiology	PhD		X	Fall 2021		recommended	In person	https://publichealth.uic.edu/academics/public-health-degrees/phd-public-health-degrees/phd-cancer-epidemiology/	https://archive.vn/sVRmD	X		X		X
University of Illinois--Chicago	Chicago, IL	19 (tie)	3.2	Community Health Sciences	PhD		X	Fall 2021		recommended	In person	https://publichealth.uic.edu/academics/public-health-degrees/phd-public-health-degrees/phd-community-health-sciences/	https://archive.vn/YwqLN	X		X					X
University of Illinois--Chicago	Chicago, IL	19 (tie)	3.2	Environmental and Occupational Health Sciences	PhD		X	Fall 2021		recommended	In person	https://publichealth.uic.edu/academics/public-health-degrees/phd-public-health-degrees/phd-environmental-occupational-health/	https://archive.vn/s4lag	X		X			X
University of Illinois--Chicago	Chicago, IL	19 (tie)	3.2	Epidemiology	PhD		X	Fall 2021		recommended	In person	https://publichealth.uic.edu/academics/public-health-degrees/phd-public-health-degrees/phd-epidemiology/	https://archive.vn/LQfmK	X		X		X
University of Illinois--Chicago	Chicago, IL	19 (tie)	3.2	Health Policy and Administration	PhD		X	Fall 2021		recommended	In person	https://publichealth.uic.edu/academics/public-health-degrees/phd-public-health-degrees/phd-health-policy-administration/	https://archive.vn/QKPlR	X		X				X
University of Illinois--Chicago	Chicago, IL	19 (tie)	3.2	Maternal and Child Health	PhD		X	Fall 2021		recommended	In person	https://publichealth.uic.edu/academics/public-health-degrees/phd-public-health-degrees/phd-maternal-child-health/	https://archive.vn/mloK1	X		X
University of Illinois--Chicago	Chicago, IL	19 (tie)	3.2	Maternal and Child Health Epidemiology	PhD		X	Fall 2021		recommended	In person	https://publichealth.uic.edu/academics/public-health-degrees/phd-public-health-degrees/phd-maternal-child-health-epidemiology/	https://archive.vn/clZv4	X		X		X
University of Illinois--Chicago	Chicago, IL	19 (tie)	3.2	Occupational and Environmental Epidemiology	PhD		X	Fall 2021		recommended	In person	https://publichealth.uic.edu/academics/public-health-degrees/phd-public-health-degrees/phd-occupational-environmental-epidemiology/	https://archive.vn/fbftN	X		X			X
University of Iowa	Iowa City, IA	19 (tie)	3.2	Health Administration	MHA	X				-	In person (night classes)	https://www.public-health.uiowa.edu/mha/	https://web.archive.org/web/20200914001938/https://www.public-health.uiowa.edu/mha-how-to-apply/	X	X
University of Iowa	Iowa City, IA	19 (tie)	3.2	Biostatistics	MPH	X				-	In person	https://www.public-health.uiowa.edu/mph-biostatistics/	https://web.archive.org/web/20200827183256/https://www.public-health.uiowa.edu/how-to-apply-mph/	X	X		X
University of Iowa	Iowa City, IA	19 (tie)	3.2	Community and Behavioral Health	MPH	X				-	In person	https://www.public-health.uiowa.edu/mph-cbh/	https://web.archive.org/web/20200827183256/https://www.public-health.uiowa.edu/how-to-apply-mph/	X	X						X
University of Iowa	Iowa City, IA	19 (tie)	3.2	Epidemiology	MPH	X				-	In person	https://www.public-health.uiowa.edu/mph-epidemiology/	https://web.archive.org/web/20200827183256/https://www.public-health.uiowa.edu/how-to-apply-mph/	X	X			X
University of Iowa	Iowa City, IA	19 (tie)	3.2	General Public Health	MPH	X				-	In person	https://www.public-health.uiowa.edu/mph-general/	https://web.archive.org/web/20200827183256/https://www.public-health.uiowa.edu/how-to-apply-mph/	X	X
University of Iowa	Iowa City, IA	19 (tie)	3.2	Occupational and Environmental Health	MPH	X				-	In person	https://www.public-health.uiowa.edu/mph-oeh/	https://web.archive.org/web/20200827183256/https://www.public-health.uiowa.edu/how-to-apply-mph/	X	X				X
University of Iowa	Iowa City, IA	19 (tie)	3.2	Policy	MPH	X				-	In person	https://www.public-health.uiowa.edu/mph-in-policy-curriculum/	https://web.archive.org/web/20200827183256/https://www.public-health.uiowa.edu/how-to-apply-mph/	X	X					X
University of Iowa	Iowa City, IA	19 (tie)	3.2	Agricultural Safety and Health	MS			Fall 2020, Summer 2020		optional	In person	https://www.public-health.uiowa.edu/how-to-apply-oeh/	https://archive.vn/TpH1J	X	X
University of Iowa	Iowa City, IA	19 (tie)	3.2	Biostatistics	MS			Fall 2020		optional	In person	https://www.public-health.uiowa.edu/ms-biostatistics/	Removed before captured (removed before 2020/08/23)	X	X		X
University of Iowa	Iowa City, IA	19 (tie)	3.2	Clinical Investigation	MS			Fall 2020, Summer 2020		optional	In person	https://www.public-health.uiowa.edu/ms-clinical-investigation/	https://web.archive.org/web/20200621150640/https://www.public-health.uiowa.edu/how-to-apply-epidemiology/	X	X
University of Iowa	Iowa City, IA	19 (tie)	3.2	Epidemiology	MS			Fall 2020, Summer 2020		optional	In person	https://www.public-health.uiowa.edu/ms-epidemiology/	https://web.archive.org/web/20200621150640/https://www.public-health.uiowa.edu/how-to-apply-epidemiology/	X	X			X
University of Iowa	Iowa City, IA	19 (tie)	3.2	Health Policy	MS				X		In person	https://www.public-health.uiowa.edu/ms-in-health-policy/		X	X					X
University of Iowa	Iowa City, IA	19 (tie)	3.2	Industrial Hygiene	MS			Fall 2020, Summer 2020		optional	In person	https://www.public-health.uiowa.edu/how-to-apply-oeh/	https://archive.vn/TpH1J	X	X				X
University of Iowa	Iowa City, IA	19 (tie)	3.2	Occupational and Environmental Health	MS			Fall 2020, Summer 2020		optional	In person	https://www.public-health.uiowa.edu/how-to-apply-oeh/	https://archive.vn/TpH1J	X	X				X
University of Iowa	Iowa City, IA	19 (tie)	3.2	Biostatistics	PhD			Fall 2020		optional	In person	https://www.public-health.uiowa.edu/phd-biostatistics/	Removed before captured (removed before 2020/08/23)	X		X	X
University of Iowa	Iowa City, IA	19 (tie)	3.2	Community and Behavioral Health	PhD				X		In person	https://www.public-health.uiowa.edu/phd-community-and-behavioral-health/		X		X					X
University of Iowa	Iowa City, IA	19 (tie)	3.2	Epidemiology	PhD			Fall 2020, Summer 2020		optional	In person	https://www.public-health.uiowa.edu/phd-in-epidemiology/	https://web.archive.org/web/20200621150640/https://www.public-health.uiowa.edu/how-to-apply-epidemiology/	X		X		X
University of Iowa	Iowa City, IA	19 (tie)	3.2	Health Services and Policy	PhD				X		In person	https://www.public-health.uiowa.edu/hmp-phd/		X		X				X
University of Iowa	Iowa City, IA	19 (tie)	3.2	Occupational and Environmental Health	PhD			Fall 2020, Summer 2020		optional	In person	https://www.public-health.uiowa.edu/how-to-apply-oeh/	https://archive.vn/TpH1J	X		X			X
Colorado School of Public Health	Aurora, CO	23 (tie)	3.1	Community and Behavioral Health	DrPH	X				optional	In person	https://coloradosph.cuanschutz.edu/education/degrees-and-programs/doctor-of-public-health/drph-in-community-behavioral-health	https://web.archive.org/web/20191024004431/https://source.colostate.edu/colorado-school-of-public-health-drops-its-gre-requirement-for-admission/	X		X					X
Colorado School of Public Health	Aurora, CO	23 (tie)	3.1	Environmental and Occupational Health	DrPH	X				optional	In person	https://coloradosph.cuanschutz.edu/education/degrees-and-programs/doctor-of-public-health/drph-in-environmental-occupational-health	https://web.archive.org/web/20191024004431/https://source.colostate.edu/colorado-school-of-public-health-drops-its-gre-requirement-for-admission/	X		X
Colorado School of Public Health	Aurora, CO	23 (tie)	3.1	Epidemiology	DrPH	X				optional	In person	https://coloradosph.cuanschutz.edu/education/degrees-and-programs/doctor-of-public-health/drph-in-epidemiology	https://web.archive.org/web/20191024004431/https://source.colostate.edu/colorado-school-of-public-health-drops-its-gre-requirement-for-admission/	X		X		X
Colorado School of Public Health	Aurora, CO	23 (tie)	3.1	Animals, People and the Environment	MPH	X				optional	In person	https://publichealth.colostate.edu/concentration/animals-people-and-the-environment/	https://web.archive.org/web/20191024004431/https://source.colostate.edu/colorado-school-of-public-health-drops-its-gre-requirement-for-admission/	X	X				X
Colorado School of Public Health	Aurora, CO	23 (tie)	3.1	Applied Biostatistics	MPH	X				optional	In person	https://coloradosph.cuanschutz.edu/education/degrees-and-programs/master-of-public-health/mph-in-applied-biostatistics	https://web.archive.org/web/20191024004431/https://source.colostate.edu/colorado-school-of-public-health-drops-its-gre-requirement-for-admission/	X	X		X
Colorado School of Public Health	Aurora, CO	23 (tie)	3.1	Community and Behavioral Health	MPH	X				optional	In person	https://coloradosph.cuanschutz.edu/education/degrees-and-programs/master-of-public-health/mph-in-community-and-behavioral-health	https://web.archive.org/web/20191024004431/https://source.colostate.edu/colorado-school-of-public-health-drops-its-gre-requirement-for-admission/	X	X						X
Colorado School of Public Health	Aurora, CO	23 (tie)	3.1	Community Health Education	MPH	X				optional	In person (night classes)	https://coloradosph.cuanschutz.edu/education/degrees-and-programs/master-of-public-health/mph-in-community-health-education	https://web.archive.org/web/20191024004431/https://source.colostate.edu/colorado-school-of-public-health-drops-its-gre-requirement-for-admission/	X	X						X
Colorado School of Public Health	Aurora, CO	23 (tie)	3.1	Environmental and Occupational Health	MPH	X				optional	In person	https://coloradosph.cuanschutz.edu/education/degrees-and-programs/master-of-public-health/mph-in-environmental-occupational-health	https://web.archive.org/web/20191024004431/https://source.colostate.edu/colorado-school-of-public-health-drops-its-gre-requirement-for-admission/	X	X
Colorado School of Public Health	Aurora, CO	23 (tie)	3.1	Epidemiology	MPH	X				optional	In person	https://coloradosph.cuanschutz.edu/education/degrees-and-programs/master-of-public-health/mph-in-epidemiology-at-cu-anschutz	https://web.archive.org/web/20191024004431/https://source.colostate.edu/colorado-school-of-public-health-drops-its-gre-requirement-for-admission/	X	X			X
Colorado School of Public Health	Aurora, CO	23 (tie)	3.1	Epidemiology	MPH	X				optional	In person	https://publichealth.colostate.edu/concentration/epidemiology/	https://web.archive.org/web/20191024004431/https://source.colostate.edu/colorado-school-of-public-health-drops-its-gre-requirement-for-admission/	X	X			X
Colorado School of Public Health	Aurora, CO	23 (tie)	3.1	Global Health and Health Disparities	MPH	X				optional	In person	https://publichealth.colostate.edu/concentration/global-health-and-health-disparities/	https://web.archive.org/web/20191024004431/https://source.colostate.edu/colorado-school-of-public-health-drops-its-gre-requirement-for-admission/	X	X
Colorado School of Public Health	Aurora, CO	23 (tie)	3.1	Health Communication	MPH	X				optional	In person	https://publichealth.colostate.edu/concentration/health-communication/	https://web.archive.org/web/20191024004431/https://source.colostate.edu/colorado-school-of-public-health-drops-its-gre-requirement-for-admission/	X	X						X
Colorado School of Public Health	Aurora, CO	23 (tie)	3.1	Health Systems, Management and Policy	MPH	X				optional	In person	https://coloradosph.cuanschutz.edu/education/degrees-and-programs/master-of-public-health/mph-in-health-systems-management-policy	https://web.archive.org/web/20191024004431/https://source.colostate.edu/colorado-school-of-public-health-drops-its-gre-requirement-for-admission/	X	X					X
Colorado School of Public Health	Aurora, CO	23 (tie)	3.1	Leadership and Public Health Practice	MPH	X				optional	Online	https://coloradosph.cuanschutz.edu/education/degrees-and-programs/master-of-public-health/mph-in-leadership-public-health-practice	https://web.archive.org/web/20191024004431/https://source.colostate.edu/colorado-school-of-public-health-drops-its-gre-requirement-for-admission/	X	X
Colorado School of Public Health	Aurora, CO	23 (tie)	3.1	Maternal and Child Health	MPH	X				optional	In person	https://coloradosph.cuanschutz.edu/education/degrees-and-programs/master-of-public-health/mph-in-maternal-child-health	https://web.archive.org/web/20191024004431/https://source.colostate.edu/colorado-school-of-public-health-drops-its-gre-requirement-for-admission/	X	X
Colorado School of Public Health	Aurora, CO	23 (tie)	3.1	Physical Activity and Healthy Lifestyles	MPH	X				optional	In person	https://publichealth.colostate.edu/concentration/physical-activity-healthy-lifestyles/	https://web.archive.org/web/20191024004431/https://source.colostate.edu/colorado-school-of-public-health-drops-its-gre-requirement-for-admission/	X	X
Colorado School of Public Health	Aurora, CO	23 (tie)	3.1	Population Mental Health and Wellbeing	MPH	X				optional	In person	https://coloradosph.cuanschutz.edu/education/degrees-and-programs/master-of-public-health/mph-in-population-mental-health-wellbeing	https://web.archive.org/web/20191024004431/https://source.colostate.edu/colorado-school-of-public-health-drops-its-gre-requirement-for-admission/	X	X
Colorado School of Public Health	Aurora, CO	23 (tie)	3.1	Public Health Nutrition	MPH	X				optional	In person	https://publichealth.colostate.edu/concentration/public-health-nutrition/	https://web.archive.org/web/20191024004431/https://source.colostate.edu/colorado-school-of-public-health-drops-its-gre-requirement-for-admission/	X	X
Colorado School of Public Health	Aurora, CO	23 (tie)	3.1	Biostatistics	MS				X		In person	https://coloradosph.cuanschutz.edu/education/degrees-and-programs/master-of-science/2-ms-in-applied-biostatistics		X	X		X
Colorado School of Public Health	Aurora, CO	23 (tie)	3.1	Epidemiology	MS				X		In person	https://coloradosph.cuanschutz.edu/education/degrees-and-programs/master-of-science/ms-in-epidemiology		X	X			X
Colorado School of Public Health	Aurora, CO	23 (tie)	3.1	Health Services Research	MS				X		In person	https://coloradosph.cuanschutz.edu/education/degrees-and-programs/master-of-science/ms-in-health-services-research		X	X					X
Colorado School of Public Health	Aurora, CO	23 (tie)	3.1	Biostatistics	PhD				X		In person	https://coloradosph.cuanschutz.edu/education/degrees-and-programs/doctor-of-philosophy/phd-in-biostatistics		X		X	X
Colorado School of Public Health	Aurora, CO	23 (tie)	3.1	Epidemiology	PhD				X		In person	https://coloradosph.cuanschutz.edu/education/degrees-and-programs/doctor-of-philosophy/phd-in-epidemiology		X		X		X
Colorado School of Public Health	Aurora, CO	23 (tie)	3.1	Health Services Research	PhD				X		In person	https://coloradosph.cuanschutz.edu/education/degrees-and-programs/doctor-of-philosophy/phd-in-health-services-research		X		X				X
CUNY School of Public Health	New York, NY	23 (tie)	3.1	Community Health	MPH	X				-	In person	https://sph.cuny.edu/academics/degrees-programs/masters-programs/mph-in-community-health/	https://web.archive.org/web/20200830173721/https://sph.cuny.edu/academics/degrees-programs/masters-programs/mph-in-community-health/	X	X						X
CUNY School of Public Health	New York, NY	23 (tie)	3.1	Environmental and Occupational Health Sciences	MPH				X		In person	https://sph.cuny.edu/academics/degrees-programs/masters-programs/mph-in-environmental-and-occupational-health-sciences/		X	X				X
CUNY School of Public Health	New York, NY	23 (tie)	3.1	Epidemiology and Biostatistics	MPH			Fall 2020		optional?	In person	https://sph.cuny.edu/academics/degrees-programs/masters-programs/mph-in-epidemiology-and-biostatistics/	https://web.archive.org/web/20200823184030/https://sph.cuny.edu/academics/degrees-programs/masters-programs/mph-in-epidemiology-and-biostatistics/#1550611874454-4f4e2ee1-17e6	X	X		X	X
CUNY School of Public Health	New York, NY	23 (tie)	3.1	Health Policy and Management	MPH	X				-	In person	https://sph.cuny.edu/academics/degrees-programs/masters-programs/mph-in-health-policy-and-management/	https://web.archive.org/web/20200830173853/https://sph.cuny.edu/academics/degrees-programs/masters-programs/mph-in-health-policy-and-management/	X	X					X
CUNY School of Public Health	New York, NY	23 (tie)	3.1	Public Health Nutrition	MPH	X				-	In person	https://sph.cuny.edu/academics/degrees-programs/masters-programs/mph-in-public-health-nutrition/	https://web.archive.org/web/20200830173944/https://sph.cuny.edu/academics/degrees-programs/masters-programs/mph-in-public-health-nutrition/	X	X
CUNY School of Public Health	New York, NY	23 (tie)	3.1	Environmental and Occupational Health Sciences	MS				X		In person	https://sph.cuny.edu/academics/degrees-programs/masters-programs/ms-in-environmental-occupational-health-sciences/		X	X				X
CUNY School of Public Health	New York, NY	23 (tie)	3.1	Global and Migrant Health Policy	MS	X				-	Online	https://sph.cuny.edu/academics/degrees-programs/masters-programs/ms-in-global-and-migrant-health-policy/	https://web.archive.org/web/20200830174035/https://sph.cuny.edu/academics/degrees-programs/masters-programs/ms-in-global-and-migrant-health-policy/	X	X
CUNY School of Public Health	New York, NY	23 (tie)	3.1	Health Communication for Social Change	MS	X				-	Online	https://sph.cuny.edu/academics/degrees-programs/masters-programs/ms-in-health-communications-for-social-change/	https://web.archive.org/web/20200830174113/https://sph.cuny.edu/academics/degrees-programs/masters-programs/ms-in-health-communications-for-social-change/	X	X						X
CUNY School of Public Health	New York, NY	23 (tie)	3.1	Population Health Informatics	MS	X				-	Online	https://sph.cuny.edu/academics/degrees-programs/masters-programs/ms-in-population-health-informatics/	https://web.archive.org/web/20200830174156/https://sph.cuny.edu/academics/degrees-programs/masters-programs/ms-in-population-health-informatics/	X	X
CUNY School of Public Health	New York, NY	23 (tie)	3.1	Community Health and Health Policy	PhD				X		In person	https://sph.cuny.edu/academics/degrees-programs/doctoral-programs/phd-in-community-health-and-health-policy/		X		X				X	X
CUNY School of Public Health	New York, NY	23 (tie)	3.1	Environmental and Planetary Health Sciences	PhD				X		In person	https://sph.cuny.edu/academics/degrees-programs/doctoral-programs/phd-in-environmental-and-planetary-health-sciences/		X		X			X
CUNY School of Public Health	New York, NY	23 (tie)	3.1	Epidemiology	PhD				X		In person	https://sph.cuny.edu/academics/degrees-programs/doctoral-programs/phd-in-epidemiology/		X		X		X
Ohio State University	Columbus, OH	23 (tie)	3.1	Health Administration	MHA	X				optional	In person	https://cph.osu.edu/prospective-students/mha	https://web.archive.org/web/20200827190126/https://cph.osu.edu/prospective-students/apply-graduate	X	X
Ohio State University	Columbus, OH	23 (tie)	3.1	Biomedical Informatics	MPH	X				optional	In person	https://cph.osu.edu/prospective-students/mph/biomedical-informatics	https://web.archive.org/web/20200827190126/https://cph.osu.edu/prospective-students/apply-graduate	X	X
Ohio State University	Columbus, OH	23 (tie)	3.1	Biostatistics	MPH	X				optional	In person	https://cph.osu.edu/prospective-students/mph/biostatistics	https://web.archive.org/web/20200827190126/https://cph.osu.edu/prospective-students/apply-graduate	X	X		X
Ohio State University	Columbus, OH	23 (tie)	3.1	Clinical Translational Science	MPH	X				optional	In person	https://cph.osu.edu/prospective-students/mph/clinical-translational-science	https://web.archive.org/web/20200827190126/https://cph.osu.edu/prospective-students/apply-graduate	X	X
Ohio State University	Columbus, OH	23 (tie)	3.1	Environmental Health	MPH	X				optional	In person	https://cph.osu.edu/prospective-students/mph/environmental-health-sciences	https://web.archive.org/web/20200827190126/https://cph.osu.edu/prospective-students/apply-graduate	X	X				X
Ohio State University	Columbus, OH	23 (tie)	3.1	Epidemiology	MPH	X				optional	In person	https://cph.osu.edu/prospective-students/mph/epidemiology	https://web.archive.org/web/20200827190126/https://cph.osu.edu/prospective-students/apply-graduate	X	X			X
Ohio State University	Columbus, OH	23 (tie)	3.1	Health Behavior and Health Promotion	MPH	X				optional	In person	https://cph.osu.edu/prospective-students/mph/health-behavior-health-promotion	https://web.archive.org/web/20200827190126/https://cph.osu.edu/prospective-students/apply-graduate	X	X						X
Ohio State University	Columbus, OH	23 (tie)	3.1	Program for Experienced Professionals	MPH	X				optional	In person	https://cph.osu.edu/prospective-students/mph/pep/program-for-experienced-professionals	https://web.archive.org/web/20200827190126/https://cph.osu.edu/prospective-students/apply-graduate	X	X
Ohio State University	Columbus, OH	23 (tie)	3.1	Veterinary Public Health	MPH	X				optional	In person	https://cph.osu.edu/prospective-students/mph/veterinary-public-health	https://web.archive.org/web/20200827190126/https://cph.osu.edu/prospective-students/apply-graduate	X	X
Ohio State University	Columbus, OH	23 (tie)	3.1	Biomedical Informatics	MS				X		In person	https://cph.osu.edu/prospective-students/ms/biomedical-informatics		X	X
Ohio State University	Columbus, OH	23 (tie)	3.1	Biostatistics	MS				X		In person	https://cph.osu.edu/prospective-students/ms/biostatistics		X	X		X
Ohio State University	Columbus, OH	23 (tie)	3.1	Environmental Public Health	MS				X		In person	https://cph.osu.edu/prospective-students/ms/environmental-health-sciences		X	X				X
Ohio State University	Columbus, OH	23 (tie)	3.1	Epidemiology	MS				X		In person	https://cph.osu.edu/prospective-students/ms/epidemiology		X	X			X
Ohio State University	Columbus, OH	23 (tie)	3.1	Biostatistics	PhD				X		In person	https://cph.osu.edu/prospective-students/phd/biostatistics		X		X	X
Ohio State University	Columbus, OH	23 (tie)	3.1	Environmental Public Health	PhD				X		In person	https://cph.osu.edu/prospective-students/phd/environmental-health-sciences		X		X			X
Ohio State University	Columbus, OH	23 (tie)	3.1	Epidemiology	PhD				X		In person	https://cph.osu.edu/prospective-students/phd/epidemiology		X		X		X
Ohio State University	Columbus, OH	23 (tie)	3.1	Health Behavior and Health Promotion	PhD				X		In person	https://cph.osu.edu/prospective-students/phd/health-behavior-health-promotion		X		X					X
Ohio State University	Columbus, OH	23 (tie)	3.1	Health Services Management and Policy	PhD				X		In person	https://cph.osu.edu/prospective-students/phd/health-services-management-and-policy		X		X				X
San Diego State University	San Diego, CA	23 (tie)	3.1	Biometry	MPH		X	Fall 2021		optional?	In person	https://publichealth.sdsu.edu/programs/mph/biometry/	https://web.archive.org/web/20200827191035/https://publichealth.sdsu.edu/programs/mph/admissions-mph-ms/	X	X
San Diego State University	San Diego, CA	23 (tie)	3.1	Environmental Health	MPH		X	Fall 2021		optional?	In person	https://publichealth.sdsu.edu/programs/mph/environmental-health/	https://web.archive.org/web/20200827191035/https://publichealth.sdsu.edu/programs/mph/admissions-mph-ms/	X	X				X
San Diego State University	San Diego, CA	23 (tie)	3.1	Epidemiology	MPH		X	Fall 2021		optional?	In person	https://publichealth.sdsu.edu/programs/mph/epidemiology/	https://web.archive.org/web/20200827191035/https://publichealth.sdsu.edu/programs/mph/admissions-mph-ms/	X	X			X
San Diego State University	San Diego, CA	23 (tie)	3.1	Health Management and Policy	MPH		X	Fall 2021		optional?	In person	https://publichealth.sdsu.edu/programs/mph/health-mgmt-policy/	https://web.archive.org/web/20200827191035/https://publichealth.sdsu.edu/programs/mph/admissions-mph-ms/	X	X					X
San Diego State University	San Diego, CA	23 (tie)	3.1	Health Promotion and Behavioral Science	MPH		X	Fall 2021		optional?	In person	https://publichealth.sdsu.edu/programs/mph/health-promotion-behavioral-sci/	https://web.archive.org/web/20200827191035/https://publichealth.sdsu.edu/programs/mph/admissions-mph-ms/	X	X						X
San Diego State University	San Diego, CA	23 (tie)	3.1	Health Promotion and Behavioral Science	MPH		X	Fall 2021		optional?	Online	https://publichealth.sdsu.edu/programs/mph/health-promotion-behavioral-sci-online/	https://web.archive.org/web/20200827192013/https://publichealth.sdsu.edu/programs/mph/health-promotion-behavioral-sci-online/ , https://publichealth.sdsu.edu/programs/mph/admissions-mph-ms/	X	X						X
San Diego State University	San Diego, CA	23 (tie)	3.1	Environmental Health Sciences	MS		X	Fall 2021		optional?	In person	https://publichealth.sdsu.edu/programs/ms/environmental-health-sciences/	https://web.archive.org/web/20200827191035/https://publichealth.sdsu.edu/programs/mph/admissions-mph-ms/	X	X				X
San Diego State University	San Diego, CA	23 (tie)	3.1	Epidemiology	PhD		X	Fall 2021		optional?	In person	https://ph.ucsd.edu/jdp/tracks/epidemiology/index.html	https://web.archive.org/web/20200920033339/https://ph.ucsd.edu/jdp/admissions/index.html	X		X		X
San Diego State University	San Diego, CA	23 (tie)	3.1	Global Health	PhD		X	Fall 2021		optional?	In person	https://ph.ucsd.edu/jdp/tracks/global-health/index.html	https://web.archive.org/web/20200920033339/https://ph.ucsd.edu/jdp/admissions/index.html	X		X
San Diego State University	San Diego, CA	23 (tie)	3.1	Health Behavior	PhD		X	Fall 2021		optional?	In person	https://ph.ucsd.edu/jdp/tracks/health-behavior/index.html	https://web.archive.org/web/20200920033339/https://ph.ucsd.edu/jdp/admissions/index.html	X		X					X
Tufts University	Boston, MA	23 (tie)	3.1	Behavioral Science and Health Communication	MPH	X				optional	In person	https://publichealth.tufts.edu/graduate-programs/public-health/master-public-health/mph-concentrations-tracks	https://web.archive.org/web/20200827192759/https://publichealth.tufts.edu/graduate-programs/public-health/master-public-health/mph-admissions-tuition	X	X						X
Tufts University	Boston, MA	23 (tie)	3.1	Epidemiology and Biostatistics	MPH	X				optional	In person	https://publichealth.tufts.edu/graduate-programs/public-health/master-public-health/mph-concentrations-tracks	https://web.archive.org/web/20200827192759/https://publichealth.tufts.edu/graduate-programs/public-health/master-public-health/mph-admissions-tuition	X	X		X	X
Tufts University	Boston, MA	23 (tie)	3.1	Epidemiology and Biostatistics	MPH	X				optional	Online	https://onlinepublichealth.tufts.edu/online-master-public-health/admissions/	https://web.archive.org/web/20200827192657/https://onlinepublichealth.tufts.edu/sr-mph-admissions-form/	X	X		X	X
Tufts University	Boston, MA	23 (tie)	3.1	Health Services Management and Policy	MPH	X				optional	In person	https://publichealth.tufts.edu/graduate-programs/public-health/master-public-health/mph-concentrations-tracks	https://web.archive.org/web/20200827192759/https://publichealth.tufts.edu/graduate-programs/public-health/master-public-health/mph-admissions-tuition	X	X					X
Tufts University	Boston, MA	23 (tie)	3.1	Nutrition	MPH	X				optional	In person	https://publichealth.tufts.edu/graduate-programs/public-health/master-public-health/mph-concentrations-tracks	https://web.archive.org/web/20200827192759/https://publichealth.tufts.edu/graduate-programs/public-health/master-public-health/mph-admissions-tuition	X	X
Tufts University	Boston, MA	23 (tie)	3.1	Health Informatics and Analytics	MS	X				optional	Online	https://onlinepublichealth.tufts.edu/online-masters-health-informatics-analytics/admissions/	https://web.archive.org/web/20200827193001/https://onlinepublichealth.tufts.edu/online-masters-health-informatics-analytics/admissions/	X	X
University of California--Davis	Davis, CA	23 (tie)	3.1	Health Informatics	MHI	X				optional?	In person	https://health.ucdavis.edu/informatics/masters/index.html	https://web.archive.org/web/20200827193523/https://health.ucdavis.edu/informatics/admission/index.html	X	X
University of California--Davis	Davis, CA	23 (tie)	3.1	Epidemiology	MPH				X		In person	https://health.ucdavis.edu/phs/education/mph/index.html		X	X			X
University of California--Davis	Davis, CA	23 (tie)	3.1	General Public Health	MPH				X		In person	https://health.ucdavis.edu/phs/education/mph/index.html		X	X
University of California--Davis	Davis, CA	23 (tie)	3.1	Biostatistics	MS				X		In person	https://biostatistics.ucdavis.edu/grad/masters-program-biostatistics		X	X		X
University of California--Davis	Davis, CA	23 (tie)	3.1	Biostatistics	PhD				X		In person	https://biostatistics.ucdavis.edu/grad/phd-program-biostatistics		X		X	X
University of California--Davis	Davis, CA	23 (tie)	3.1	Public Health Sciences	PhD				X		In person	https://health.ucdavis.edu/phs/education/PhD/phd_about.html		X		X
University of Pennsylvania	Philadelphia, PA	23 (tie)	3.1	Environmental Health	MPH	X				-	In person	http://www.publichealth.med.upenn.edu/cphi/mph/EnvironmentalHealthTrack.html	https://archive.vn/A047o	X	X				X
University of Pennsylvania	Philadelphia, PA	23 (tie)	3.1	Generalist	MPH	X				-	In person	http://www.publichealth.med.upenn.edu/cphi/mph/GeneralistTrackOverview.html	https://archive.vn/A047o	X	X
University of Pennsylvania	Philadelphia, PA	23 (tie)	3.1	Global Health	MPH	X				-	In person	http://www.publichealth.med.upenn.edu/cphi/mph/MPHGlobalHealthTrack.html	https://archive.vn/A047o	X	X
University of Pennsylvania	Philadelphia, PA	23 (tie)	3.1	Biostatistics	MS	X				-	In person	https://www.med.upenn.edu/ggeb/bio-academics.html	https://archive.vn/FkcXN	X	X		X
University of Pennsylvania	Philadelphia, PA	23 (tie)	3.1	Biostatistics	PhD	X				-	In person	https://www.med.upenn.edu/ggeb/bio-academics.html	https://archive.vn/FkcXN	X		X	X
University of Pennsylvania	Philadelphia, PA	23 (tie)	3.1	Epidemiology	PhD	X				-	In person	https://www.med.upenn.edu/ggeb/epid-academics.html	https://archive.vn/TVs7v	X		X		X
University of South Carolina	Columbia, SC	23 (tie)	3.1	Health Administration	MHA				X		In person	https://www.sc.edu/study/colleges_schools/public_health/study/graduate_degrees/health_services_policy_and_management/index.php		X	X
University of South Carolina	Columbia, SC	23 (tie)	3.1	Health Administration	MHA				X		In person (weekend classes)	https://www.sc.edu/study/colleges_schools/public_health/study/graduate_degrees/health_services_policy_and_management/index.php		X	X
University of South Carolina	Columbia, SC	23 (tie)	3.1	Environmental Health Sciences	MPH				X		In person	https://www.sc.edu/study/colleges_schools/public_health/study/graduate_degrees/environmental_health_sciences/index.php		X	X				X
University of South Carolina	Columbia, SC	23 (tie)	3.1	Epidemiology	MPH				X		In person	https://www.sc.edu/study/colleges_schools/public_health/study/graduate_degrees/epidemiology/index.php		X	X			X
University of South Carolina	Columbia, SC	23 (tie)	3.1	Health Promotion, Education, and Behavior	MPH				X		In person	https://www.sc.edu/study/colleges_schools/public_health/study/graduate_degrees/health_promotion_education_and_behavior/index.php		X	X						X
University of South Carolina	Columbia, SC	23 (tie)	3.1	Health Promotion, Education, and Behavior	MPH				X		Online	https://www.sc.edu/study/colleges_schools/public_health/study/graduate_degrees/health_promotion_education_and_behavior/index.php		X	X						X
University of South Carolina	Columbia, SC	23 (tie)	3.1	Health Services Policy and Management	MPH				X		In person	https://www.sc.edu/study/colleges_schools/public_health/study/graduate_degrees/health_services_policy_and_management/index.php		X	X					X
University of South Carolina	Columbia, SC	23 (tie)	3.1	Physical Activity and Public Health	MPH				X		In person	https://www.sc.edu/study/colleges_schools/public_health/study/graduate_degrees/physical_activity_and_public_health/index.php		X	X
University of South Carolina	Columbia, SC	23 (tie)	3.1	Environmental Health Sciences	MS				X		In person	https://www.sc.edu/study/colleges_schools/public_health/study/graduate_degrees/environmental_health_sciences/index.php		X	X				X
University of South Carolina	Columbia, SC	23 (tie)	3.1	Epidemiology	MS				X		In person	https://www.sc.edu/study/colleges_schools/public_health/study/graduate_degrees/epidemiology/index.php		X	X			X
University of South Carolina	Columbia, SC	23 (tie)	3.1	Biostatistics	MSPH				X		In person	https://www.sc.edu/study/colleges_schools/public_health/study/graduate_degrees/biostatistics/index.php		X	X		X
University of South Carolina	Columbia, SC	23 (tie)	3.1	Biostatistics	PhD				X		In person	https://www.sc.edu/study/colleges_schools/public_health/study/graduate_degrees/biostatistics/index.php		X		X	X
University of South Carolina	Columbia, SC	23 (tie)	3.1	Environmental Health Sciences	PhD				X		In person	https://www.sc.edu/study/colleges_schools/public_health/study/graduate_degrees/environmental_health_sciences/index.php		X		X			X
University of South Carolina	Columbia, SC	23 (tie)	3.1	Epidemiology	PhD				X		In person	https://www.sc.edu/study/colleges_schools/public_health/study/graduate_degrees/epidemiology/index.php		X		X		X
University of South Carolina	Columbia, SC	23 (tie)	3.1	Health Promotion, Education, and Behavior	PhD				X		In person	https://www.sc.edu/study/colleges_schools/public_health/study/graduate_degrees/health_promotion_education_and_behavior/index.php		X		X					X
University of South Carolina	Columbia, SC	23 (tie)	3.1	Health Services Policy and Management	PhD				X		In person	https://www.sc.edu/study/colleges_schools/public_health/study/graduate_degrees/health_services_policy_and_management/index.php		X		X				X
University of Texas--Houston Health Sciences Center	Houston, TX	23 (tie)	3.1	Community Health Practice	DrPH		X	Fall 2021		optional?	In person	https://sph.uth.edu/degree-finder/index.htm?searchby=dp&did=2021eb3f-6a42-4b62-a63b-31a8f0af2aca&dept=9e0ae463-bd89-4235-ac7e-59fb4b0e5f93	https://web.archive.org/web/20200903203418/https://sph.uth.edu/application/	X		X					X
University of Texas--Houston Health Sciences Center	Houston, TX	23 (tie)	3.1	Health Promotion and Health Education	DrPH		X	Fall 2021		optional?	In person	https://sph.uth.edu/degree-finder/index.htm?searchby=dp&did=7c8d5cf7-5efe-4312-8a7e-c61d25f327ef&dept=b330b85d-8d37-4ca7-a924-1a8aa6deac94	https://web.archive.org/web/20200903203418/https://sph.uth.edu/application/	X		X					X
University of Texas--Houston Health Sciences Center	Houston, TX	23 (tie)	3.1	Community Health Practice	MPH		X	Fall 2021		optional?	In person	https://sph.uth.edu/degree-finder/index.htm?searchby=dp&did=2021eb3f-6a42-4b62-a63b-31a8f0af2aca&dept=af912ca1-e0df-45de-bf7a-bf4095921e44	https://web.archive.org/web/20200903203418/https://sph.uth.edu/application/	X	X						X
University of Texas--Houston Health Sciences Center	Houston, TX	23 (tie)	3.1	Dietetic Internship	MPH		X	Fall 2021		optional?	In person	https://sph.uth.edu/degree-finder/index.htm?searchby=dp&did=7c8d5cf7-5efe-4312-8a7e-c61d25f327ef&dept=f1e97190-bd86-41d3-996f-d168385cafdf	https://web.archive.org/web/20200903203418/https://sph.uth.edu/application/	X	X
University of Texas--Houston Health Sciences Center	Houston, TX	23 (tie)	3.1	Environmental Health	MPH		X	Fall 2021		optional?	In person	https://sph.uth.edu/degree-finder/index.htm?searchby=dp&did=c3fa0cd7-80bc-4aa1-8c73-896d5b750d65&dept=4a44054e-dd1c-4236-98be-dd35e1ff99e7	https://web.archive.org/web/20200903203418/https://sph.uth.edu/application/	X	X				X
University of Texas--Houston Health Sciences Center	Houston, TX	23 (tie)	3.1	Epidemiology	MPH		X	Fall 2021		optional?	In person	https://sph.uth.edu/degree-finder/index.htm?searchby=dp&did=1b7e8012-857b-4a21-a479-7af51b046223&dept=30f75324-3519-4d81-a383-7f05465b53ca	https://web.archive.org/web/20200903203418/https://sph.uth.edu/application/	X	X			X
University of Texas--Houston Health Sciences Center	Houston, TX	23 (tie)	3.1	General Public Health	MPH		X	Fall 2021		optional?	In person	https://sph.uth.edu/degree-finder/index.htm?searchby=dp&did=21249afc-e049-4923-8ec9-14888af7793f&dept=27b11ad7-f1f9-4b7c-9a1b-d7dcf014c62a	https://web.archive.org/web/20200903203418/https://sph.uth.edu/application/	X	X
University of Texas--Houston Health Sciences Center	Houston, TX	23 (tie)	3.1	Health Promotion and Health Education	MPH		X	Fall 2021		optional?	In person	https://sph.uth.edu/degree-finder/index.htm?searchby=dp&did=7c8d5cf7-5efe-4312-8a7e-c61d25f327ef&dept=c45c41dc-db40-4443-bedd-cafe958b2f42	https://web.archive.org/web/20200903203418/https://sph.uth.edu/application/	X	X						X
University of Texas--Houston Health Sciences Center	Houston, TX	23 (tie)	3.1	Health Services Organizations	MPH		X	Fall 2021		optional?	In person	https://sph.uth.edu/degree-finder/index.htm?searchby=dp&did=a29cb8f8-a5ba-4ece-9c67-e614030039ab&dept=78c5245d-4592-4a77-a362-1ed7e28dd4bf	https://web.archive.org/web/20200903203418/https://sph.uth.edu/application/	X	X					X
University of Texas--Houston Health Sciences Center	Houston, TX	23 (tie)	3.1	Healthcare Management	MPH		X	Fall 2021		optional?	In person	https://sph.uth.edu/degree-finder/index.htm?searchby=dp&did=a29cb8f8-a5ba-4ece-9c67-e614030039ab&dept=45f6d807-f174-41a1-9f4c-ce3a23928402	https://web.archive.org/web/20200903203418/https://sph.uth.edu/application/	X	X					X
University of Texas--Houston Health Sciences Center	Houston, TX	23 (tie)	3.1	Biostatistics	MS		X	Fall 2021		optional?	In person	https://sph.uth.edu/degree-finder/index.htm?searchby=dp&did=fe3ca3cd-dce3-49d4-9605-cce71f18e16f&dept=7297560a-877b-4c7f-a6cb-8c39f27f37bd	https://web.archive.org/web/20200903203418/https://sph.uth.edu/application/	X	X		X
University of Texas--Houston Health Sciences Center	Houston, TX	23 (tie)	3.1	Behavioral Sciences and Health Promotion	PhD		X	Fall 2021		optional?	In person	https://sph.uth.edu/degree-finder/index.htm?searchby=dp&did=7c8d5cf7-5efe-4312-8a7e-c61d25f327ef&dept=39f10957-ee8e-4a99-be8f-98ef7f1fac32	https://web.archive.org/web/20200903203418/https://sph.uth.edu/application/	X		X					X
University of Texas--Houston Health Sciences Center	Houston, TX	23 (tie)	3.1	Biostatistics	PhD		X	Fall 2021		optional?	In person	https://sph.uth.edu/degree-finder/index.htm?searchby=dp&did=fe3ca3cd-dce3-49d4-9605-cce71f18e16f&dept=a5b87ecb-add2-4bfa-b4b2-16046906b909	https://web.archive.org/web/20200903203418/https://sph.uth.edu/application/	X		X	X
University of Texas--Houston Health Sciences Center	Houston, TX	23 (tie)	3.1	Environmental Science: Environmental Disease Prevention	PhD		X	Fall 2021		optional?	In person	https://sph.uth.edu/degree-finder/index.htm?searchby=dp&did=c3fa0cd7-80bc-4aa1-8c73-896d5b750d65&dept=fc9929f6-6791-464f-810f-b7d04a912b8c	https://web.archive.org/web/20200903203418/https://sph.uth.edu/application/	X		X			X
University of Texas--Houston Health Sciences Center	Houston, TX	23 (tie)	3.1	Environmental Science: Total Worker Health	PhD		X	Fall 2021		optional?	In person	https://sph.uth.edu/degree-finder/index.htm?searchby=dp&did=c3fa0cd7-80bc-4aa1-8c73-896d5b750d65&dept=562be636-21fd-4009-bd68-acb77ad8ad72	https://web.archive.org/web/20200903203418/https://sph.uth.edu/application/	X		X			X
University of Texas--Houston Health Sciences Center	Houston, TX	23 (tie)	3.1	Epidemiology	PhD		X	Fall 2021		optional?	In person	https://sph.uth.edu/degree-finder/index.htm?searchby=dp&did=1b7e8012-857b-4a21-a479-7af51b046223&dept=d44638b2-f19d-4ca4-9653-716af0c29fc1	https://web.archive.org/web/20200903203418/https://sph.uth.edu/application/	X		X		X
University of Texas--Houston Health Sciences Center	Houston, TX	23 (tie)	3.1	Health Economics and Health Services Research	PhD		X	Fall 2021		optional?	In person	https://sph.uth.edu/degree-finder/index.htm?searchby=dp&did=a29cb8f8-a5ba-4ece-9c67-e614030039ab&dept=05fb0f7d-2aed-4bf6-8194-c2e06eff9f42	https://web.archive.org/web/20200903203418/https://sph.uth.edu/application/	X		X				X
University of Texas--Houston Health Sciences Center	Houston, TX	23 (tie)	3.1	Healthcare Management and Health Policy	PhD		X	Fall 2021		optional?	In person	https://sph.uth.edu/degree-finder/index.htm?searchby=dp&did=a29cb8f8-a5ba-4ece-9c67-e614030039ab&dept=f36e621b-7bbf-4971-9120-3c5c156bf89a	https://web.archive.org/web/20200903203418/https://sph.uth.edu/application/	X		X				X
Oregon Health & Science University/Portland State University	Portland, OR	32 (tie)	3	Biostatistics	MPH		X	Fall 2021		-	In person	https://ohsu-psu-sph.org/mph-in-biostatistics/	https://web.archive.org/web/20200817152359/https://ohsu-psu-sph.org/grad-admissions/	X	X		X
Oregon Health & Science University/Portland State University	Portland, OR	32 (tie)	3	Environmental Systems and Human Health	MPH		X	Fall 2021		-	In person	https://ohsu-psu-sph.org/mph-environmental-systems-human-health/	https://web.archive.org/web/20200817152359/https://ohsu-psu-sph.org/grad-admissions/	X	X				X
Oregon Health & Science University/Portland State University	Portland, OR	32 (tie)	3	Epidemiology	MPH		X	Fall 2021		-	In person	https://ohsu-psu-sph.org/mph-in-epidemiology/	https://web.archive.org/web/20200817152359/https://ohsu-psu-sph.org/grad-admissions/	X	X			X
Oregon Health & Science University/Portland State University	Portland, OR	32 (tie)	3	Health Management and Policy	MPH		X	Fall 2021		-	In person	https://ohsu-psu-sph.org/mph-health-management-policy/	https://web.archive.org/web/20200817152359/https://ohsu-psu-sph.org/grad-admissions/	X	X					X
Oregon Health & Science University/Portland State University	Portland, OR	32 (tie)	3	Health Promotion	MPH		X	Fall 2021		-	In person	https://ohsu-psu-sph.org/mph-health-promotion/	https://web.archive.org/web/20200817152359/https://ohsu-psu-sph.org/grad-admissions/	X	X						X
Oregon Health & Science University/Portland State University	Portland, OR	32 (tie)	3	Public Health Practice	MPH		X	Fall 2021		-	In person	https://ohsu-psu-sph.org/mph-in-public-health-practice/	https://web.archive.org/web/20200817152359/https://ohsu-psu-sph.org/grad-admissions/	X	X
Oregon Health & Science University/Portland State University	Portland, OR	32 (tie)	3	Biostatistics	MS		X	Fall 2021		-	In person	https://ohsu-psu-sph.org/ms-in-biostatistics/	https://web.archive.org/web/20200817152359/https://ohsu-psu-sph.org/grad-admissions/	X	X		X
Oregon Health & Science University/Portland State University	Portland, OR	32 (tie)	3	Community Health	PhD		X	Fall 2021		-	In person	https://ohsu-psu-sph.org/phd-community-health/	https://web.archive.org/web/20200817152359/https://ohsu-psu-sph.org/grad-admissions/	X		X					X
Oregon Health & Science University/Portland State University	Portland, OR	32 (tie)	3	Epidemiology	PhD		X	Fall 2021		-	In person	https://ohsu-psu-sph.org/phd-in-epidemiology/	https://web.archive.org/web/20200817152359/https://ohsu-psu-sph.org/grad-admissions/	X		X		X
Oregon Health & Science University/Portland State University	Portland, OR	32 (tie)	3	Health Systems and Policy	PhD		X	Fall 2021		-	In person	https://ohsu-psu-sph.org/phd-health-systems-policy/	https://web.archive.org/web/20200817152359/https://ohsu-psu-sph.org/grad-admissions/	X		X				X
Rutgers University--Piscataway	Piscataway, NJ	32 (tie)	3	Leadership, Practice, and Research	DrPH	X				optional	Hybrid, online	https://sph.rutgers.edu/academics/drph.html	https://web.archive.org/web/20200827202442/https://sph.rutgers.edu/academics/drph.html	X		X
Rutgers University--Piscataway	Piscataway, NJ	32 (tie)	3	Biostatistics	MPH		X	Fall 2021, Fall 2020		optional	In person	https://sph.rutgers.edu/concentrations/Biostatistics-Epidemiology/degrees-mph-biostatistics.html	https://web.archive.org/web/20200614193745/https://sph.rutgers.edu/admissions/how-to-apply.html	X	X		X
Rutgers University--Piscataway	Piscataway, NJ	32 (tie)	3	Environmental Health Sciences	MPH		X	Fall 2021, Fall 2020		optional	In person	https://sph.rutgers.edu/concentrations/Environmental-Occupational-Health/degrees-mph-ehs.html	https://web.archive.org/web/20200614193745/https://sph.rutgers.edu/admissions/how-to-apply.html	X	X				X
Rutgers University--Piscataway	Piscataway, NJ	32 (tie)	3	Epidemiology	MPH		X	Fall 2021, Fall 2020		optional	In person	https://sph.rutgers.edu/concentrations/Biostatistics-Epidemiology/degrees-mph-epi.html	https://web.archive.org/web/20200614193745/https://sph.rutgers.edu/admissions/how-to-apply.html	X	X			X
Rutgers University--Piscataway	Piscataway, NJ	32 (tie)	3	Global Public Health	MPH		X	Fall 2021, Fall 2020		optional	In person	https://sph.rutgers.edu/concentrations/urban-global-public-health/degrees-mph-glph.html	https://web.archive.org/web/20200614193745/https://sph.rutgers.edu/admissions/how-to-apply.html	X	X
Rutgers University--Piscataway	Piscataway, NJ	32 (tie)	3	Health Systems and Policy	MPH		X	Fall 2021, Fall 2020		optional	In person	https://sph.rutgers.edu/concentrations/health-behavior-society-policy/degrees-mph-hsap.html	https://web.archive.org/web/20200614193745/https://sph.rutgers.edu/admissions/how-to-apply.html	X	X					X
Rutgers University--Piscataway	Piscataway, NJ	32 (tie)	3	LGBTQ Health	MPH		X	Fall 2021, Fall 2020		optional	In person	https://sph.rutgers.edu/concentrations/urban-global-public-health/degrees-mph-lgbtq.html	https://web.archive.org/web/20200614193745/https://sph.rutgers.edu/admissions/how-to-apply.html	X	X
Rutgers University--Piscataway	Piscataway, NJ	32 (tie)	3	Occupational and Environmental Medicine	MPH		X	Fall 2021, Fall 2020		optional	In person	https://sph.rutgers.edu/concentrations/Environmental-Occupational-Health/degrees-mph-oem.html	https://web.archive.org/web/20200614193745/https://sph.rutgers.edu/admissions/how-to-apply.html	X	X				X
Rutgers University--Piscataway	Piscataway, NJ	32 (tie)	3	Occupational Safety and Health	MPH		X	Fall 2021, Fall 2020		optional	In person	https://sph.rutgers.edu/concentrations/Environmental-Occupational-Health/degrees-mph-ohs.html	https://web.archive.org/web/20200614193745/https://sph.rutgers.edu/admissions/how-to-apply.html	X	X				X
Rutgers University--Piscataway	Piscataway, NJ	32 (tie)	3	Public Health Nutrition	MPH		X	Fall 2021, Fall 2020		optional	In person	https://sph.rutgers.edu/concentrations/urban-global-public-health/degrees-mph-phnt.html	https://web.archive.org/web/20200614193745/https://sph.rutgers.edu/admissions/how-to-apply.html	X	X
Rutgers University--Piscataway	Piscataway, NJ	32 (tie)	3	Social and Behavioral Health Sciences	MPH		X	Fall 2021, Fall 2020		optional	In person	https://sph.rutgers.edu/concentrations/health-behavior-society-policy/degrees-mph-sbhs.html	https://web.archive.org/web/20200614193745/https://sph.rutgers.edu/admissions/how-to-apply.html	X	X						X
Rutgers University--Piscataway	Piscataway, NJ	32 (tie)	3	Urban Public Health	MPH		X	Fall 2021, Fall 2020		optional	In person	https://sph.rutgers.edu/concentrations/urban-global-public-health/degrees-mph-urph.html	https://web.archive.org/web/20200614193745/https://sph.rutgers.edu/admissions/how-to-apply.html	X	X
Rutgers University--Piscataway	Piscataway, NJ	32 (tie)	3	Biostatistics	MS				X		In person	https://sph.rutgers.edu/concentrations/Biostatistics-Epidemiology/degrees-ms-biostatistics.html		X	X		X
Rutgers University--Piscataway	Piscataway, NJ	32 (tie)	3	Health Outcomes, Policy and Economics	MS				X		In person	https://sph.rutgers.edu/concentrations/Biostatistics-Epidemiology/degrees-ms-epi-hope.html		X	X					X
Rutgers University--Piscataway	Piscataway, NJ	32 (tie)	3	Biostatistics	PhD				X		In person	https://sph.rutgers.edu/concentrations/Biostatistics-Epidemiology/degrees-phd-biostatistics.html		X		X	X
Rutgers University--Piscataway	Piscataway, NJ	32 (tie)	3	Environmental and Occupational Health	PhD				X		In person	https://sph.rutgers.edu/concentrations/Environmental-Occupational-Health/degrees-phd.html		X		X			X
Rutgers University--Piscataway	Piscataway, NJ	32 (tie)	3	Epidemiology	PhD				X		In person	https://sph.rutgers.edu/concentrations/Biostatistics-Epidemiology/degrees-phd-epi.html		X		X		X
Rutgers University--Piscataway	Piscataway, NJ	32 (tie)	3	Health Systems and Policy	PhD				X		In person	https://sph.rutgers.edu/concentrations/health-behavior-society-policy/degrees-phd-hsap.html		X		X				X
Rutgers University--Piscataway	Piscataway, NJ	32 (tie)	3	Social and Behavioral Health Sciences	PhD				X		In person	https://sph.rutgers.edu/concentrations/health-behavior-society-policy/degrees-phd-sbhs.html		X		X					X
University of Arizona	Tucson, AZ	32 (tie)	3	Maternal and Child Health	DrPH			Fall 2020		optional	In person	https://publichealth.arizona.edu/academics/doctoral-programs/drph-in-mch	https://web.archive.org/web/20200823200557/https://publichealth.arizona.edu/graduate-students/drph-mch-admissions-criteria, confirmed to be extended to Fall 2021 through email	X		X
University of Arizona	Tucson, AZ	32 (tie)	3	Public Health Policy and Management	DrPH			Fall 2020		optional	In person	https://publichealth.arizona.edu/academics/doctoral-programs/drph-in-phpm	https://web.archive.org/web/20200823200804/https://publichealth.arizona.edu/graduate-students/drph-phpm-admissions-criteria, confirmed to be extended to Fall 2021 through email	X		X				X
University of Arizona	Tucson, AZ	32 (tie)	3	Applied Epidemiology	MPH			Spring 2021, Fall 2020		optional	Online	https://online.arizona.edu/programs/graduate/online-master-public-health-public-health-mph	https://web.archive.org/web/20200827203305/https://online.arizona.edu/programs/graduate/online-master-public-health-public-health-mph, confirmed to be extended to Fall 2021 through email	X	X			X
University of Arizona	Tucson, AZ	32 (tie)	3	Biostatistics	MPH			Fall 2020		optional	In person	https://publichealth.arizona.edu/academics/masters/mph/biostatistics	https://web.archive.org/web/20200823200910/https://publichealth.arizona.edu/graduate-students/mph-admissions-criteria, confirmed to be extended to Fall 2021 through email	X	X		X
University of Arizona	Tucson, AZ	32 (tie)	3	Environmental and Occupational Health	MPH			Fall 2020		optional	In person	https://publichealth.arizona.edu/academics/masters/mph/eoh	https://web.archive.org/web/20200823200910/https://publichealth.arizona.edu/graduate-students/mph-admissions-criteria, confirmed to be extended to Fall 2021 through email	X	X
University of Arizona	Tucson, AZ	32 (tie)	3	Epidemiology	MPH			Fall 2020		optional	In person	https://publichealth.arizona.edu/academics/masters/mph/epi	https://web.archive.org/web/20200823200910/https://publichealth.arizona.edu/graduate-students/mph-admissions-criteria, confirmed to be extended to Fall 2021 through email	X	X			X
University of Arizona	Tucson, AZ	32 (tie)	3	Family and Child Health	MPH			Fall 2020		optional	In person	https://publichealth.arizona.edu/academics/masters/mph/fch	https://web.archive.org/web/20200823200910/https://publichealth.arizona.edu/graduate-students/mph-admissions-criteria, confirmed to be extended to Fall 2021 through email	X	X
University of Arizona	Tucson, AZ	32 (tie)	3	Health Behavior Health Promotion	MPH			Fall 2020		optional	In person	https://publichealth.arizona.edu/academics/masters/mph/hbhp	https://web.archive.org/web/20200823200910/https://publichealth.arizona.edu/graduate-students/mph-admissions-criteria, confirmed to be extended to Fall 2021 through email	X	X						X
University of Arizona	Tucson, AZ	32 (tie)	3	Health Behavior Health Promotion	MPH			Spring 2021, Fall 2020		optional	Online	https://online.arizona.edu/programs/graduate/online-master-public-health-public-health-mph	https://web.archive.org/web/20200827203305/https://online.arizona.edu/programs/graduate/online-master-public-health-public-health-mph, confirmed to be extended to Fall 2021 through email	X	X						X
University of Arizona	Tucson, AZ	32 (tie)	3	Health Services Administration	MPH			Fall 2020		optional	In person	https://publichealth.arizona.edu/academics/masters/mph/hsa	https://web.archive.org/web/20200823200910/https://publichealth.arizona.edu/graduate-students/mph-admissions-criteria, confirmed to be extended to Fall 2021 through email	X	X					X
University of Arizona	Tucson, AZ	32 (tie)	3	Health Services Administration	MPH			Spring 2021, Fall 2020		optional	Online	https://online.arizona.edu/programs/graduate/online-master-public-health-public-health-mph	https://web.archive.org/web/20200827203305/https://online.arizona.edu/programs/graduate/online-master-public-health-public-health-mph, confirmed to be extended to Fall 2021 through email	X	X					X
University of Arizona	Tucson, AZ	32 (tie)	3	One Health	MPH			Fall 2020		optional	In person	https://publichealth.arizona.edu/academics/masters/mph/one-health	https://web.archive.org/web/20200823200910/https://publichealth.arizona.edu/graduate-students/mph-admissions-criteria, confirmed to be extended to Fall 2021 through email	X	X
University of Arizona	Tucson, AZ	32 (tie)	3	Public Health Policy and Management	MPH			Fall 2020		optional	In person	https://publichealth.arizona.edu/academics/masters/mph/phpm	https://web.archive.org/web/20200823200910/https://publichealth.arizona.edu/graduate-students/mph-admissions-criteria, confirmed to be extended to Fall 2021 through email	X	X					X
University of Arizona	Tucson, AZ	32 (tie)	3	Public Health Practice	MPH			Fall 2020		optional	In person	https://publichealth.arizona.edu/academics/masters/mph/php	https://web.archive.org/web/20200823200910/https://publichealth.arizona.edu/graduate-students/mph-admissions-criteria, confirmed to be extended to Fall 2021 through email	X	X
University of Arizona	Tucson, AZ	32 (tie)	3	Biostatistics	MS			Fall 2020		optional	In person	https://publichealth.arizona.edu/academics/masters/ms/biostatistics	https://web.archive.org/web/20200823201026/https://publichealth.arizona.edu/graduate-students/phd-biostats-admissions-criteria, confirmed to be extended to Fall 2021 through email	X	X		X
University of Arizona	Tucson, AZ	32 (tie)	3	Environmental Health Sciences	MS			Fall 2020		optional	In person	https://publichealth.arizona.edu/academics/masters/ehs	https://archive.vn/mskCh, confirmed to be extended to Fall 2021 through email	X	X				X
University of Arizona	Tucson, AZ	32 (tie)	3	Epidemiology	MS			Fall 2020		optional	In person	https://publichealth.arizona.edu/academics/masters/ms/epi	https://web.archive.org/web/20200823201327/https://publichealth.arizona.edu/graduate-students/ms-phd-epi-admissions-criteria, confirmed to be extended to Fall 2021 through email	X	X			X
University of Arizona	Tucson, AZ	32 (tie)	3	Biostatistics	PhD			Fall 2020		optional	In person	https://publichealth.arizona.edu/academics/doctoral-programs/biostatistics	https://web.archive.org/web/20200823201026/https://publichealth.arizona.edu/graduate-students/phd-biostats-admissions-criteria, confirmed to be extended to Fall 2021 through email	X		X	X
University of Arizona	Tucson, AZ	32 (tie)	3	Environmental Health Sciences	PhD			Fall 2020		optional	In person	https://publichealth.arizona.edu/academics/doctoral-programs/ehs	https://archive.vn/mskCh, confirmed to be extended to Fall 2021 through email	X		X			X
University of Arizona	Tucson, AZ	32 (tie)	3	Epidemiology	PhD			Fall 2020		optional	In person	https://publichealth.arizona.edu/academics/doctoral-programs/epi	https://web.archive.org/web/20200823201327/https://publichealth.arizona.edu/graduate-students/ms-phd-epi-admissions-criteria, confirmed to be extended to Fall 2021 through email	X		X		X
University of Arizona	Tucson, AZ	32 (tie)	3	Health Behavior Health Promotion	PhD			Fall 2020		optional	In person	https://publichealth.arizona.edu/academics/doctoral-programs/health-behavior-health-promotion	https://web.archive.org/web/20200823201442/https://publichealth.arizona.edu/graduate-students/phd-hbhp-admissions-criteria, confirmed to be extended to Fall 2021 through email	X		X					X
University of Maryland--College Park	College Park, MD	32 (tie)	3	Kinesiology	MA		X	Fall 2021		optional?	In person	https://sph.umd.edu/degrees/ma-kinesiology	https://web.archive.org/web/20200823210024/https://sph.umd.edu/content/graduate-admissions	X	X
University of Maryland--College Park	College Park, MD	32 (tie)	3	Health Administration	MHA		X	Fall 2021		optional?	In person	https://sph.umd.edu/department/hlsa/master-health-administration-mha-program-0	https://web.archive.org/web/20200823210024/https://sph.umd.edu/content/graduate-admissions	X	X
University of Maryland--College Park	College Park, MD	32 (tie)	3	Health Administration	MHA		X	Fall 2021		optional?	Online	https://sph.umd.edu/department/hlsa/master-health-administration-mha-online-program	https://web.archive.org/web/20200823210024/https://sph.umd.edu/content/graduate-admissions	X	X
University of Maryland--College Park	College Park, MD	32 (tie)	3	Behavioral and Community Health	MPH		X	Fall 2021		optional?	In person, online	https://sph.umd.edu/department/bch/mph-behavioral-and-community-health	https://web.archive.org/web/20200823210024/https://sph.umd.edu/content/graduate-admissions	X	X						X
University of Maryland--College Park	College Park, MD	32 (tie)	3	Biostatistics	MPH		X	Fall 2021		optional?	In person	https://sph.umd.edu/department/epib/mph-biostatistics	https://web.archive.org/web/20200823210024/https://sph.umd.edu/content/graduate-admissions	X	X		X
University of Maryland--College Park	College Park, MD	32 (tie)	3	Environmental Health Sciences	MPH		X	Fall 2021		optional?	In person	https://sph.umd.edu/department/miaeh/mph-environmental-health-sciences	https://web.archive.org/web/20200823210024/https://sph.umd.edu/content/graduate-admissions	X	X				X
University of Maryland--College Park	College Park, MD	32 (tie)	3	Epidemiology	MPH		X	Fall 2021		optional?	In person	https://sph.umd.edu/department/epib/mph-epidemiology	https://web.archive.org/web/20200823210024/https://sph.umd.edu/content/graduate-admissions	X	X			X
University of Maryland--College Park	College Park, MD	32 (tie)	3	Health Equity	MPH		X	Fall 2021		optional?	In person	https://sph.umd.edu/department/hlsa/master-public-health-mph-health-equity	https://web.archive.org/web/20200823210024/https://sph.umd.edu/content/graduate-admissions	X	X
University of Maryland--College Park	College Park, MD	32 (tie)	3	Health Policy Analysis and Evaluation	MPH		X	Fall 2021		optional?	In person	https://sph.umd.edu/department/hlsa/master-public-health-mph-health-policy-analysis-and-evaluation	https://web.archive.org/web/20200823210024/https://sph.umd.edu/content/graduate-admissions	X	X					X
University of Maryland--College Park	College Park, MD	32 (tie)	3	Physical Activity	MPH		X	Fall 2021		optional?	In person	https://sph.umd.edu/department/knes/master-public-health-mph-physical-activity	https://web.archive.org/web/20200823210024/https://sph.umd.edu/content/graduate-admissions	X	X
University of Maryland--College Park	College Park, MD	32 (tie)	3	Public Health Practice and Policy	MPH		X	Fall 2021		optional?	Online	https://sph.umd.edu/department/hlsa/master-public-health-mph-public-health-practice-and-policy-online	https://web.archive.org/web/20200823210024/https://sph.umd.edu/content/graduate-admissions	X	X					X
University of Maryland--College Park	College Park, MD	32 (tie)	3	Couple and Family Therapy	MS		X	Fall 2021		optional?	In person	https://sph.umd.edu/degrees/ms-couple-and-family-therapy	https://web.archive.org/web/20200823210024/https://sph.umd.edu/content/graduate-admissions	X	X
University of Maryland--College Park	College Park, MD	32 (tie)	3	Environmental Health Sciences	MS		X	Fall 2021		optional?	In person	https://sph.umd.edu/degrees/ms-environmental-health-sciences	https://web.archive.org/web/20200823210024/https://sph.umd.edu/content/graduate-admissions	X	X				X
University of Maryland--College Park	College Park, MD	32 (tie)	3	Behavioral and Community Health	PhD		X	Fall 2021		optional?	In person	https://sph.umd.edu/degrees/phd-behavioral-and-community-health	https://web.archive.org/web/20200823210024/https://sph.umd.edu/content/graduate-admissions	X		X					X
University of Maryland--College Park	College Park, MD	32 (tie)	3	Biostatistics and Bioinformatics	PhD		X	Fall 2021		optional?	In person	https://sph.umd.edu/degrees/phd-biostatistics-bioinformatics	https://web.archive.org/web/20200823210024/https://sph.umd.edu/content/graduate-admissions	X		X	X
University of Maryland--College Park	College Park, MD	32 (tie)	3	Environmental Health Sciences	PhD		X	Fall 2021		optional?	In person	https://sph.umd.edu/degrees/phd-environmental-health-sciences	https://web.archive.org/web/20200823210024/https://sph.umd.edu/content/graduate-admissions	X		X			X
University of Maryland--College Park	College Park, MD	32 (tie)	3	Epidemiology	PhD				X		In person	https://sph.umd.edu/degrees/phd-epidemiology		X		X		X
University of Maryland--College Park	College Park, MD	32 (tie)	3	Family Sciences	PhD		X	Fall 2021		optional?	In person	https://sph.umd.edu/degrees/phd-family-science	https://web.archive.org/web/20200823210024/https://sph.umd.edu/content/graduate-admissions	X		X
University of Maryland--College Park	College Park, MD	32 (tie)	3	Health Services Research	PhD				X		In person	https://sph.umd.edu/degrees/phd-health-services-research		X		X				X
University of Maryland--College Park	College Park, MD	32 (tie)	3	Kinesiology	PhD		X	Fall 2021		optional?	In person	https://sph.umd.edu/degrees/phd-kinesiology	https://web.archive.org/web/20200823210024/https://sph.umd.edu/content/graduate-admissions	X		X
University of Maryland--College Park	College Park, MD	32 (tie)	3	Maternal and Child Health	PhD		X	Fall 2021		optional?	In person	https://sph.umd.edu/degrees/phd-maternal-and-child-health	https://web.archive.org/web/20200823210024/https://sph.umd.edu/content/graduate-admissions	X		X
University of Massachusetts--Amherst	Amherst, MA	32 (tie)	3	Biostatistics	MPH				X		In person	https://www.umass.edu/sphhs/biostatistics/degree-programs/master-public-health-mph		X	X		X
University of Massachusetts--Amherst	Amherst, MA	32 (tie)	3	Community Health Education	MPH				X		In person	https://www.umass.edu/sphhs/community-health-education/masters-programs/master-public-health-mph		X	X						X
University of Massachusetts--Amherst	Amherst, MA	32 (tie)	3	Environmental Health Sciences	MPH				X		In person	https://www.umass.edu/sphhs/environmental-health-sciences/masters-programs/master-public-health-mph		X	X				X
University of Massachusetts--Amherst	Amherst, MA	32 (tie)	3	Epidemiology	MPH				X		In person	https://www.umass.edu/sphhs/epidemiology/degree-programs/master-public-health-mph		X	X			X
University of Massachusetts--Amherst	Amherst, MA	32 (tie)	3	Health Policy and Management	MPH				X		In person	https://www.umass.edu/sphhs/health-policy-and-management/masters-programs/master-public-health-mph		X	X					X
University of Massachusetts--Amherst	Amherst, MA	32 (tie)	3	Nutrition	MPH			Spring 2021		optional?	Online	https://www.umass.edu/sphhs-online/programs/mph-nutrition	https://web.archive.org/web/20200820085839/https://www.umass.edu/sphhs-online/programs/mph-nutrition	X	X
University of Massachusetts--Amherst	Amherst, MA	32 (tie)	3	Public Health	MPH			Spring 2021		optional?	Online	https://www.umass.edu/sphhs-online/programs/mph-worcester-program	https://web.archive.org/web/20200820090156/https://www.umass.edu/sphhs-online/programs/mph-worcester-program	X	X
University of Massachusetts--Amherst	Amherst, MA	32 (tie)	3	Public Health Practice	MPH			Spring 2021		optional?	Online	https://www.umass.edu/sphhs-online/programs/mph-public-health-practice	https://web.archive.org/web/20200827205639/https://www.umass.edu/sphhs-online/programs/mph-public-health-practice	X	X
University of Massachusetts--Amherst	Amherst, MA	32 (tie)	3	Biostatistics	MS				X		In person	https://www.umass.edu/sphhs/biostatistics/degree-programs/master-science-ms		X	X		X
University of Massachusetts--Amherst	Amherst, MA	32 (tie)	3	Community Health Education	MS				X		In person	https://www.umass.edu/sphhs/community-health-education/masters-programs/master-science-ms		X	X						X
University of Massachusetts--Amherst	Amherst, MA	32 (tie)	3	Environmental Health Sciences	MS				X		In person	https://www.umass.edu/sphhs/environmental-health-sciences/masters-programs/master-science-ms		X	X				X
University of Massachusetts--Amherst	Amherst, MA	32 (tie)	3	Epidemiology	MS				X		In person	https://www.umass.edu/sphhs/epidemiology/degree-programs/master-science-ms		X	X			X
University of Massachusetts--Amherst	Amherst, MA	32 (tie)	3	Health Policy and Management	MS				X		In person	https://www.umass.edu/sphhs/health-policy-and-management/masters-programs/master-science-ms		X	X					X
University of Massachusetts--Amherst	Amherst, MA	32 (tie)	3	Nutrition	MS				X		In person	https://www.umass.edu/sphhs/nutrition/graduate-programs/master-science-ms		X	X
University of Massachusetts--Amherst	Amherst, MA	32 (tie)	3	Biostatistics	PhD				X		In person	https://www.umass.edu/sphhs/biostatistics/degree-programs/doctor-philosophy-phd		X		X	X
University of Massachusetts--Amherst	Amherst, MA	32 (tie)	3	Community Health Education	PhD				X		In person	https://www.umass.edu/sphhs/community-health-education/doctor-philosophy-phd-che		X		X					X
University of Massachusetts--Amherst	Amherst, MA	32 (tie)	3	Environmental Health Sciences	PhD				X		In person	https://www.umass.edu/sphhs/environmental-health-sciences/doctor-philosophy-phd		X		X			X
University of Massachusetts--Amherst	Amherst, MA	32 (tie)	3	Epidemiology	PhD				X		In person	https://www.umass.edu/sphhs/epidemiology/degree-programs/doctor-philosophy-phd		X		X		X
University of Massachusetts--Amherst	Amherst, MA	32 (tie)	3	Health Policy and Management	PhD				X		In person	https://www.umass.edu/sphhs/health-policy-and-management/doctor-philosophy-phd		X		X				X
University of Massachusetts--Amherst	Amherst, MA	32 (tie)	3	Nutrition	PhD				X		In person	https://www.umass.edu/sphhs/nutrition/graduate-programs/doctor-philosophy-phd		X		X
New York University	New York, NY	37 (tie)	2.9	Bioethics	MA		X	Fall 2021, Fall 2020		optional	In person	https://publichealth.nyu.edu/programs/master-arts-bioethics	https://web.archive.org/web/20200823192014/https://publichealth.nyu.edu/admissions/apply-now , https://web.archive.org/web/20200614172849/https://publichealth.nyu.edu/admissions/apply-now , https://web.archive.org/web/20200823192816/https://publichealth.nyu.edu/master-arts-bioethics/admissions	X	X
New York University	New York, NY	37 (tie)	2.9	Biostatistics	MPH		X	Fall 2021, Fall 2020		optional	In person	https://publichealth.nyu.edu/master-public-health/concentrations/biostatistics	https://web.archive.org/web/20200823192014/https://publichealth.nyu.edu/admissions/apply-now , https://web.archive.org/web/20200614172849/https://publichealth.nyu.edu/admissions/apply-now , https://web.archive.org/web/20200722030256/https://publichealth.nyu.edu/master-public-health/admissions, https://archive.vn/LVLiL	X	X		X
New York University	New York, NY	37 (tie)	2.9	Community Health Science and Practice	MPH		X	Fall 2021, Fall 2020		optional	In person	https://publichealth.nyu.edu/master-public-health/concentrations/community-health-science-practice	https://web.archive.org/web/20200823192014/https://publichealth.nyu.edu/admissions/apply-now , https://web.archive.org/web/20200614172849/https://publichealth.nyu.edu/admissions/apply-now , https://web.archive.org/web/20200722030256/https://publichealth.nyu.edu/master-public-health/admissions, https://archive.vn/LVLiL	X	X						X
New York University	New York, NY	37 (tie)	2.9	Environmental Public Health Sciences	MPH		X	Fall 2021, Fall 2020		optional	In person	https://publichealth.nyu.edu/master-public-health/concentrations/environmental-public-health-sciences	https://web.archive.org/web/20200823192014/https://publichealth.nyu.edu/admissions/apply-now , https://web.archive.org/web/20200614172849/https://publichealth.nyu.edu/admissions/apply-now , https://web.archive.org/web/20200722030256/https://publichealth.nyu.edu/master-public-health/admissions, https://archive.vn/LVLiL	X	X				X
New York University	New York, NY	37 (tie)	2.9	Epidemiology	MPH		X	Fall 2021, Fall 2020		optional	In person	https://publichealth.nyu.edu/master-public-health/concentrations/epidemiology	https://web.archive.org/web/20200823192014/https://publichealth.nyu.edu/admissions/apply-now , https://web.archive.org/web/20200614172849/https://publichealth.nyu.edu/admissions/apply-now , https://web.archive.org/web/20200722030256/https://publichealth.nyu.edu/master-public-health/admissions, https://archive.vn/LVLiL	X	X			X
New York University	New York, NY	37 (tie)	2.9	Global Health	MPH		X	Fall 2021, Fall 2020		optional	In person	https://publichealth.nyu.edu/master-public-health/concentrations/global-health	https://web.archive.org/web/20200823192014/https://publichealth.nyu.edu/admissions/apply-now , https://web.archive.org/web/20200614172849/https://publichealth.nyu.edu/admissions/apply-now , https://web.archive.org/web/20200722030256/https://publichealth.nyu.edu/master-public-health/admissions, https://archive.vn/LVLiL	X	X
New York University	New York, NY	37 (tie)	2.9	Public Health Nutrition	MPH		X	Fall 2021, Fall 2020		optional	In person	https://publichealth.nyu.edu/master-public-health/concentrations/public-health-nutrition	https://web.archive.org/web/20200823192014/https://publichealth.nyu.edu/admissions/apply-now , https://web.archive.org/web/20200614172849/https://publichealth.nyu.edu/admissions/apply-now , https://web.archive.org/web/20200722030256/https://publichealth.nyu.edu/master-public-health/admissions, https://archive.vn/LVLiL	X	X
New York University	New York, NY	37 (tie)	2.9	Public Health Policy and Management	MPH		X	Fall 2021, Fall 2020		optional	In person	https://publichealth.nyu.edu/master-public-health/concentrations/public-health-policy-management	https://web.archive.org/web/20200823192014/https://publichealth.nyu.edu/admissions/apply-now , https://web.archive.org/web/20200614172849/https://publichealth.nyu.edu/admissions/apply-now , https://web.archive.org/web/20200722030256/https://publichealth.nyu.edu/master-public-health/admissions, https://archive.vn/LVLiL	X	X					X
New York University	New York, NY	37 (tie)	2.9	Social and Behavioral Sciences	MPH		X	Fall 2021, Fall 2020		optional	In person	https://publichealth.nyu.edu/master-public-health/concentrations/social-behavioral-sciences	https://web.archive.org/web/20200823192014/https://publichealth.nyu.edu/admissions/apply-now , https://web.archive.org/web/20200614172849/https://publichealth.nyu.edu/admissions/apply-now , https://web.archive.org/web/20200722030256/https://publichealth.nyu.edu/master-public-health/admissions, https://archive.vn/LVLiL	X	X						X
New York University	New York, NY	37 (tie)	2.9	Sustainable Development Goals	MPH		X	Fall 2021, Fall 2020		optional	Online	https://publichealth.nyu.edu/master-public-health/concentrations/sustainable-development-goals	https://web.archive.org/web/20200823192014/https://publichealth.nyu.edu/admissions/apply-now , https://web.archive.org/web/20200614172849/https://publichealth.nyu.edu/admissions/apply-now , https://web.archive.org/web/20200722030256/https://publichealth.nyu.edu/master-public-health/admissions, https://archive.vn/LVLiL	X	X
New York University	New York, NY	37 (tie)	2.9	Biostatistics	MS		X	Fall 2021, Fall 2020		optional	In person	https://publichealth.nyu.edu/programs/master-science-biostatistics	https://web.archive.org/web/20200823192014/https://publichealth.nyu.edu/admissions/apply-now , https://web.archive.org/web/20200614172849/https://publichealth.nyu.edu/admissions/apply-now	X	X		X
New York University	New York, NY	37 (tie)	2.9	Epidemiology	MS		X	Fall 2021, Fall 2020		optional	In person	https://publichealth.nyu.edu/programs/master-science-epidemiology	https://web.archive.org/web/20200823192014/https://publichealth.nyu.edu/admissions/apply-now , https://web.archive.org/web/20200614172849/https://publichealth.nyu.edu/admissions/apply-now	X	X			X
New York University	New York, NY	37 (tie)	2.9	Biostatistics	PhD		X	Fall 2021		optional	In person	https://publichealth.nyu.edu/programs/doctorate?id=biostatistics	https://web.archive.org/web/20200823192014/https://publichealth.nyu.edu/admissions/apply-now , https://web.archive.org/web/20200823193039/https://publichealth.nyu.edu/doctorate/admissions	X		X	X
New York University	New York, NY	37 (tie)	2.9	Epidemiology	PhD		X	Fall 2021		optional	In person	https://publichealth.nyu.edu/programs/doctorate?id=epidemiology	https://web.archive.org/web/20200823192014/https://publichealth.nyu.edu/admissions/apply-now , https://web.archive.org/web/20200823193039/https://publichealth.nyu.edu/doctorate/admissions	X		X		X
New York University	New York, NY	37 (tie)	2.9	Public Health Policy and Management	PhD		X	Fall 2021		optional	In person	https://publichealth.nyu.edu/programs/doctorate?id=public-health-policy--management	https://web.archive.org/web/20200823192014/https://publichealth.nyu.edu/admissions/apply-now , https://web.archive.org/web/20200823193039/https://publichealth.nyu.edu/doctorate/admissions	X		X				X
New York University	New York, NY	37 (tie)	2.9	Social and Behavioral Sciences	PhD		X	Fall 2021		optional	In person	https://publichealth.nyu.edu/programs/doctorate?id=social--behavioral-sciences	https://web.archive.org/web/20200823192014/https://publichealth.nyu.edu/admissions/apply-now , https://web.archive.org/web/20200823193039/https://publichealth.nyu.edu/doctorate/admissions	X		X					X
Northwestern University	Chicago, IL	37 (tie)	2.9	Community Health Research	MPH	X				optional	In person	https://www.feinberg.northwestern.edu/sites/cehs/our-programs/program-in-public-health/mph-degree-options/mph.html	https://web.archive.org/web/20200920035820/https://www.feinberg.northwestern.edu/sites/cehs/our-programs/program-in-public-health/admissions.html , https://web.archive.org/web/20200903212147/https://www.feinberg.northwestern.edu/sites/cehs/our-programs/program-in-public-health/admissions.html , https://web.archive.org/web/20200823193620/https://www.feinberg.northwestern.edu/sites/cehs/our-program…	X	X						X
Northwestern University	Chicago, IL	37 (tie)	2.9	Epidemiology	MPH	X				optional	In person	https://www.feinberg.northwestern.edu/sites/cehs/our-programs/program-in-public-health/mph-degree-options/mph.html	https://web.archive.org/web/20200920035820/https://www.feinberg.northwestern.edu/sites/cehs/our-programs/program-in-public-health/admissions.html , https://web.archive.org/web/20200903212147/https://www.feinberg.northwestern.edu/sites/cehs/our-programs/program-in-public-health/admissions.html , https://web.archive.org/web/20200823193620/https://www.feinberg.northwestern.edu/sites/cehs/our-program…	X	X			X
Northwestern University	Chicago, IL	37 (tie)	2.9	General Public Health	MPH	X				optional	In person	https://www.feinberg.northwestern.edu/sites/cehs/our-programs/program-in-public-health/mph-degree-options/mph.html	https://web.archive.org/web/20200920035820/https://www.feinberg.northwestern.edu/sites/cehs/our-programs/program-in-public-health/admissions.html , https://web.archive.org/web/20200903212147/https://www.feinberg.northwestern.edu/sites/cehs/our-programs/program-in-public-health/admissions.html , https://web.archive.org/web/20200823193620/https://www.feinberg.northwestern.edu/sites/cehs/our-program…	X	X
Northwestern University	Chicago, IL	37 (tie)	2.9	Global Health	MPH	X				optional	In person	https://www.feinberg.northwestern.edu/sites/cehs/our-programs/program-in-public-health/mph-degree-options/mph.html	https://web.archive.org/web/20200920035820/https://www.feinberg.northwestern.edu/sites/cehs/our-programs/program-in-public-health/admissions.html , https://web.archive.org/web/20200903212147/https://www.feinberg.northwestern.edu/sites/cehs/our-programs/program-in-public-health/admissions.html , https://web.archive.org/web/20200823193620/https://www.feinberg.northwestern.edu/sites/cehs/our-program…	X	X
Northwestern University	Chicago, IL	37 (tie)	2.9	Biostatistics	MS				X		In person	https://www.feinberg.northwestern.edu/sites/cehs/our-programs/master-of-science-in-biostatistics/index.html		X	X		X
Northwestern University	Chicago, IL	37 (tie)	2.9	Health Services and Outcomes Research	MS	X				optional	Online	https://www.feinberg.northwestern.edu/sites/cehs/our-programs/health-services-outcomes-research/about.html	https://web.archive.org/web/20200827211458/https://www.feinberg.northwestern.edu/sites/cehs/our-programs/health-services-outcomes-research/admissions.html	X	X					X
Northwestern University	Chicago, IL	37 (tie)	2.9	Healthcare Quality and Patient Safety	MS				X		In person	https://www.feinberg.northwestern.edu/sites/cehs/our-programs/healthcare-quality-patient-safety/index.html		X	X
Northwestern University	Chicago, IL	37 (tie)	2.9	Health Sciences: Health and Biomedical Informatics	PhD		X	Fall 2021		optional	In person	https://www.feinberg.northwestern.edu/sites/cehs/our-programs/phd-program/about/health-and-biomedical-informatics/index.html	https://web.archive.org/web/20200920040150/https://www.feinberg.northwestern.edu/sites/cehs/our-programs/phd-program/admissions.html	X		X
Northwestern University	Chicago, IL	37 (tie)	2.9	Health Sciences: Health Services and Outcomes Research	PhD		X	Fall 2021		optional	In person	https://www.feinberg.northwestern.edu/sites/cehs/our-programs/phd-program/about/health-services-and-outcomes-research/index.html	https://web.archive.org/web/20200920040150/https://www.feinberg.northwestern.edu/sites/cehs/our-programs/phd-program/admissions.html	X		X				X
Northwestern University	Chicago, IL	37 (tie)	2.9	Health Sciences: Healthcare Quality and Patient Safety	PhD		X	Fall 2021		optional	In person	https://www.feinberg.northwestern.edu/sites/cehs/our-programs/phd-program/about/healthcare-quality-and-patient-safety/index.html	https://web.archive.org/web/20200920040150/https://www.feinberg.northwestern.edu/sites/cehs/our-programs/phd-program/admissions.html	X		X
Northwestern University	Chicago, IL	37 (tie)	2.9	Health Sciences: Social Sciences and Health	PhD		X	Fall 2021		optional	In person	https://www.feinberg.northwestern.edu/sites/cehs/our-programs/phd-program/about/social-sciences-and-health/index.html	https://web.archive.org/web/20200920040150/https://www.feinberg.northwestern.edu/sites/cehs/our-programs/phd-program/admissions.html	X		X
Texas A&M Health Science Center	College Station, TX	37 (tie)	2.9	Environmental health	DrPH		X	Fall 2021		optional?	In person	https://public-health.tamu.edu/degrees/drph.html#tab-panel-4	https://archive.vn/R5kV9	X		X			X
Texas A&M Health Science Center	College Station, TX	37 (tie)	2.9	Epidemiology	DrPH		X	Fall 2021		optional?	In person	https://public-health.tamu.edu/degrees/drph.html#tab-panel-3	https://archive.vn/R5kV9	X		X		X
Texas A&M Health Science Center	College Station, TX	37 (tie)	2.9	Health Promotion and Community Health Sciences	DrPH		X	Fall 2021		optional?	In person	https://public-health.tamu.edu/degrees/drph.html#tab-panel-2	https://archive.vn/R5kV9	X		X					X
Texas A&M Health Science Center	College Station, TX	37 (tie)	2.9	Health Administration	MHA		X	Fall 2021		optional?	In person	https://public-health.tamu.edu/degrees/mha.html	https://archive.vn/fV4ot	X	X
Texas A&M Health Science Center	College Station, TX	37 (tie)	2.9	Biostatistics	MPH		X	Fall 2021, Fall 2020		optional?	In person	https://public-health.tamu.edu/degrees/mph/index.html	https://archive.vn/1Dxi7, https://web.archive.org/web/20200823195323/https://bush.tamu.edu/admissions/degree/inta/mia-mph/	X	X		X
Texas A&M Health Science Center	College Station, TX	37 (tie)	2.9	Environmental Health	MPH		X	Fall 2021, Fall 2020		optional?	In person	https://public-health.tamu.edu/degrees/mph/index.html	https://archive.vn/1Dxi7, https://web.archive.org/web/20200823195323/https://bush.tamu.edu/admissions/degree/inta/mia-mph/	X	X				X
Texas A&M Health Science Center	College Station, TX	37 (tie)	2.9	Epidemiology	MPH		X	Fall 2021, Fall 2020		optional?	In person	https://public-health.tamu.edu/degrees/mph/index.html	https://archive.vn/1Dxi7, https://web.archive.org/web/20200823195323/https://bush.tamu.edu/admissions/degree/inta/mia-mph/	X	X			X
Texas A&M Health Science Center	College Station, TX	37 (tie)	2.9	Health Policy and Management	MPH		X	Fall 2021, Fall 2020		optional?	In person	https://public-health.tamu.edu/degrees/mph/index.html	https://archive.vn/1Dxi7, https://web.archive.org/web/20200823195323/https://bush.tamu.edu/admissions/degree/inta/mia-mph/	X	X					X
Texas A&M Health Science Center	College Station, TX	37 (tie)	2.9	Health Promotion and Community Health Sciences	MPH		X	Fall 2021, Fall 2020		optional?	In person	https://public-health.tamu.edu/degrees/mph/index.html	https://archive.vn/1Dxi7, https://web.archive.org/web/20200823195323/https://bush.tamu.edu/admissions/degree/inta/mia-mph/	X	X						X
Texas A&M Health Science Center	College Station, TX	37 (tie)	2.9	Occupational Safety and Health	MPH		X	Fall 2021, Fall 2020		optional?	In person	https://public-health.tamu.edu/degrees/mph/index.html	https://archive.vn/1Dxi7, https://web.archive.org/web/20200823195323/https://bush.tamu.edu/admissions/degree/inta/mia-mph/	X	X				X
Texas A&M Health Science Center	College Station, TX	37 (tie)	2.9	Health Services Research	PhD				X		In person	https://public-health.tamu.edu/degrees/hpm/phd/		X		X				X
University at Buffalo--SUNY	Buffalo, NY	37 (tie)	2.9	Biostatistics	MA	X				optional	In person	http://sphhp.buffalo.edu/biostatistics/education/biostatistics-ma.html	https://web.archive.org/web/20200827212538/http://sphhp.buffalo.edu/biostatistics/education/biostatistics-ma/admissions.html	X	X		X
University at Buffalo--SUNY	Buffalo, NY	37 (tie)	2.9	Biostatistics	MPH	X				recommended	In person	http://sphhp.buffalo.edu/biostatistics/education/biostatistics-mph.html	https://archive.vn/vsAqL	X	X		X
University at Buffalo--SUNY	Buffalo, NY	37 (tie)	2.9	Community Health and Health Behavior	MPH	X				optional	In person	http://sphhp.buffalo.edu/community-health-and-health-behavior/education/chhb-mph.html	https://web.archive.org/web/20200830174432/http://sphhp.buffalo.edu/community-health-and-health-behavior/education/chhb-mph/admissions.html	X	X						X
University at Buffalo--SUNY	Buffalo, NY	37 (tie)	2.9	Environmental Health	MPH	X				optional	In person	http://sphhp.buffalo.edu/epidemiology-and-environmental-health/education/environmental-health-mph.html	https://web.archive.org/web/20200830174544/http://sphhp.buffalo.edu/epidemiology-and-environmental-health/education/environmental-health-mph/admissions.html	X	X				X
University at Buffalo--SUNY	Buffalo, NY	37 (tie)	2.9	Epidemiology	MPH	X				optional	In person	http://sphhp.buffalo.edu/epidemiology-and-environmental-health/education/epidemiology-mph.html	https://web.archive.org/web/20200827213531/http://sphhp.buffalo.edu/epidemiology-and-environmental-health/education/epidemiology-mph/admissions.html	X	X			X
University at Buffalo--SUNY	Buffalo, NY	37 (tie)	2.9	Health Services Administration	MPH	X				optional	In person	http://sphhp.buffalo.edu/epidemiology-and-environmental-health/education/health-services-administration-mph.html	https://web.archive.org/web/20200830174728/http://sphhp.buffalo.edu/epidemiology-and-environmental-health/education/health-services-administration-mph/admissions.html	X	X					X
University at Buffalo--SUNY	Buffalo, NY	37 (tie)	2.9	Individualized Program	MPH	X				optional	In person	http://sphhp.buffalo.edu/community-health-and-health-behavior/education/individualized-mph.html	https://web.archive.org/web/20200830174811/http://sphhp.buffalo.edu/community-health-and-health-behavior/education/individualized-mph/admissions.html	X	X
University at Buffalo--SUNY	Buffalo, NY	37 (tie)	2.9	Individualized Program	MPH	X				optional	Online	http://sphhp.buffalo.edu/community-health-and-health-behavior/education/individualized-mph-online.html	https://web.archive.org/web/20200830174850/http://sphhp.buffalo.edu/community-health-and-health-behavior/education/individualized-mph-online/admissions.html	X	X
University at Buffalo--SUNY	Buffalo, NY	37 (tie)	2.9	Bioinformatics and Biostatistics	MS	X				optional	In person	http://sphhp.buffalo.edu/biostatistics/education/bioinformatics-and-biostatistics-ms.html	https://web.archive.org/web/20200827212834/http://sphhp.buffalo.edu/biostatistics/education/bioinformatics-and-biostatistics-ms/admissions.html	X	X		X
University at Buffalo--SUNY	Buffalo, NY	37 (tie)	2.9	Community Health and Health Behavior	MS	X				optional	In person	http://sphhp.buffalo.edu/community-health-and-health-behavior/education/master-of-science-ms.html	https://web.archive.org/web/20200827212946/http://sphhp.buffalo.edu/community-health-and-health-behavior/education/master-of-science-ms/admissions.html	X	X						X
University at Buffalo--SUNY	Buffalo, NY	37 (tie)	2.9	Epidemiology	MS				X		In person	http://sphhp.buffalo.edu/epidemiology-and-environmental-health/education/epidemiology-ms.html		X	X			X
University at Buffalo--SUNY	Buffalo, NY	37 (tie)	2.9	Nutrition	MS	X				optional?	In person	http://sphhp.buffalo.edu/exercise-and-nutrition-sciences/education/nutrition-ms.html	https://web.archive.org/web/20200914003929/http://sphhp.buffalo.edu/exercise-and-nutrition-sciences/education/nutrition-ms/admissions.html	X	X
University at Buffalo--SUNY	Buffalo, NY	37 (tie)	2.9	Biostatistics	PhD				X		In person	http://sphhp.buffalo.edu/biostatistics/education/biostatistics-phd.html		X		X	X
University at Buffalo--SUNY	Buffalo, NY	37 (tie)	2.9	Cancer Prevention	PhD	X				-	In person	https://www.roswellpark.org/education/phd-program/cancer-prevention	https://web.archive.org/web/20200830175041/https://www.roswellpark.org/education/phd-program	X		X
University at Buffalo--SUNY	Buffalo, NY	37 (tie)	2.9	Community Health and Health Behavior	PhD				X		In person	http://sphhp.buffalo.edu/community-health-and-health-behavior/education/doctoral-degree-phd.html		X		X					X
University at Buffalo--SUNY	Buffalo, NY	37 (tie)	2.9	Epidemiology	PhD				X		In person	http://sphhp.buffalo.edu/epidemiology-and-environmental-health/education/epidemiology-phd.html		X		X		X
University at Buffalo--SUNY	Buffalo, NY	37 (tie)	2.9	Nutrition Science	PhD				X		In person	http://sphhp.buffalo.edu/exercise-and-nutrition-sciences/education/nutrition-science-phd.html		X		X
University of California--Irvine	Irvine, CA	37 (tie)	2.9	Biostatistics	MPH		X	Fall 2021		optional	In person	https://publichealth.uci.edu/ph/_graduate/mph_program	https://web.archive.org/web/20200914004347/https://publichealth.uci.edu/ph/_graduate/mph_admissions	X	X		X
University of California--Irvine	Irvine, CA	37 (tie)	2.9	Environmental Health	MPH		X	Fall 2021		optional	In person	https://publichealth.uci.edu/ph/_graduate/mph_program	https://web.archive.org/web/20200914004347/https://publichealth.uci.edu/ph/_graduate/mph_admissions	X	X				X
University of California--Irvine	Irvine, CA	37 (tie)	2.9	Epidemiology	MPH		X	Fall 2021		optional	In person	https://publichealth.uci.edu/ph/_graduate/mph_program	https://web.archive.org/web/20200914004347/https://publichealth.uci.edu/ph/_graduate/mph_admissions	X	X			X
University of California--Irvine	Irvine, CA	37 (tie)	2.9	Sociocultural Diversity and Health	MPH		X	Fall 2021		optional	In person	https://publichealth.uci.edu/ph/_graduate/mph_program	https://web.archive.org/web/20200914004347/https://publichealth.uci.edu/ph/_graduate/mph_admissions	X	X						X
University of California--Irvine	Irvine, CA	37 (tie)	2.9	Environmental Health Sciences	MS				X		In person	http://www.medicine.uci.edu/occupational/masters_program.asp		X	X				X
University of California--Irvine	Irvine, CA	37 (tie)	2.9	Epidemiology	MS				X		In person	http://www.epi.uci.edu/education_main/gradprogram/ms_degree/MSprgm_home.asp		X	X			X
University of California--Irvine	Irvine, CA	37 (tie)	2.9	Environmental Health Sciences	PhD				X		In person	http://www.medicine.uci.edu/occupational/doctoral_program.asp		X		X			X
University of California--Irvine	Irvine, CA	37 (tie)	2.9	Epidemiology	PhD				X		In person	http://www.epi.uci.edu/education_main/gradprogram/phd_dgree/phd_prgm_home.asp		X		X		X
University of California--Irvine	Irvine, CA	37 (tie)	2.9	Public Health: Disease Prevention	PhD				X		In person	https://publichealth.uci.edu/ph/_graduate/phd_in_ph		X		X
University of California--Irvine	Irvine, CA	37 (tie)	2.9	Public Health: Global Health	PhD				X		In person	https://publichealth.uci.edu/ph/_graduate/phd_in_ph		X		X
University of Florida	Gainesville, FL	37 (tie)	2.9	Communication Sciences and Disorders	MA		X	Fall 2021		optional	In person	https://slhs.phhp.ufl.edu/admissions/graduate-admissions/	https://web.archive.org/web/20200823202240/https://slhs.phhp.ufl.edu/admissions/graduate-admissions/	X	X
University of Florida	Gainesville, FL	37 (tie)	2.9	Health Administration	MHA		X	Fall 2021		optional	In person	https://hsrmp.phhp.ufl.edu/admissions/application-checklist/admission-requirements/	https://archive.vn/xA7cs	X	X
University of Florida	Gainesville, FL	37 (tie)	2.9	One Health	MHS				X		In person	https://egh.phhp.ufl.edu/education/degree-programs/mhs-one-health/		X	X
University of Florida	Gainesville, FL	37 (tie)	2.9	Biostatistics	MPH		X	Fall 2021, Summer 2021, Spring 2021, Fall 2020		-	In person	https://mph.ufl.edu/about/concentration-options/biostatistics/	https://web.archive.org/web/20200823202716/https://mph.ufl.edu/admissions/admissions-criteria/	X	X		X
University of Florida	Gainesville, FL	37 (tie)	2.9	Environmental Health	MPH		X	Fall 2021, Summer 2021, Spring 2021, Fall 2020		-	In person	https://mph.ufl.edu/about/concentration-options/environmental-health/	https://web.archive.org/web/20200823202716/https://mph.ufl.edu/admissions/admissions-criteria/	X	X				X
University of Florida	Gainesville, FL	37 (tie)	2.9	Epidemiology	MPH		X	Fall 2021, Summer 2021, Spring 2021, Fall 2020		-	In person	https://mph.ufl.edu/about/concentration-options/epidemiology/	https://web.archive.org/web/20200823202716/https://mph.ufl.edu/admissions/admissions-criteria/	X	X			X
University of Florida	Gainesville, FL	37 (tie)	2.9	Population Health Management	MPH		X	Fall 2021, Summer 2021, Spring 2021, Fall 2020		-	In person	https://mph.ufl.edu/about/concentration-options/population-health-management/	https://web.archive.org/web/20200823202716/https://mph.ufl.edu/admissions/admissions-criteria/	X	X					X
University of Florida	Gainesville, FL	37 (tie)	2.9	Public Health Practice	MPH		X	Fall 2021, Summer 2021, Spring 2021, Fall 2020		-	In person	https://mph.ufl.edu/about/concentration-options/public-health-practice/	https://web.archive.org/web/20200823202716/https://mph.ufl.edu/admissions/admissions-criteria/	X	X
University of Florida	Gainesville, FL	37 (tie)	2.9	Public Health Practice	MPH		X	Fall 2021, Summer 2021, Spring 2021, Fall 2020		-	Online	https://mph.ufl.edu/about/concentration-options/public-health-practice/public-health-practice/	https://web.archive.org/web/20200823202716/https://mph.ufl.edu/admissions/admissions-criteria/	X	X
University of Florida	Gainesville, FL	37 (tie)	2.9	Social and Behavioral Sciences	MPH		X	Fall 2021, Summer 2021, Spring 2021, Fall 2020		-	In person	https://mph.ufl.edu/about/concentration-options/social-and-behavioral-sciences/	https://web.archive.org/web/20200823202716/https://mph.ufl.edu/admissions/admissions-criteria/	X	X						X
University of Florida	Gainesville, FL	37 (tie)	2.9	Social and Behavioral Sciences	MPH		X	Fall 2021, Summer 2021, Spring 2021, Fall 2020		-	Online	https://mph.ufl.edu/about/concentration-options/social-and-behavioral-sciences/social-and-behavioral-sciences/	https://web.archive.org/web/20200823202716/https://mph.ufl.edu/admissions/admissions-criteria/	X	X						X
University of Florida	Gainesville, FL	37 (tie)	2.9	Biostatistics	MS		X	Fall 2021		optional	In person	http://biostat.ufl.edu/education/ms-in-biostatistics/ms-how-to-apply/	https://web.archive.org/web/20200823202831/http://biostat.ufl.edu/education/ms-in-biostatistics/ms-how-to-apply/	X	X		X
University of Florida	Gainesville, FL	37 (tie)	2.9	Biostatistics	MS		X	Fall 2021		optional	Online	http://biostat.ufl.edu/education/msonline/ms-online-how-to-apply/	https://archive.vn/k3pA2	X	X		X
University of Florida	Gainesville, FL	37 (tie)	2.9	Epidemiology	MS		X	Fall 2021, Summer 2021, Spring 2021, Fall 2020		optional	In person	https://epidemiology.phhp.ufl.edu/admissions/apply/	https://web.archive.org/web/20200823203152/https://epidemiology.phhp.ufl.edu/admissions/apply/	X	X			X
University of Florida	Gainesville, FL	37 (tie)	2.9	Biostatistics	PhD		X	Fall 2021		optional	In person	http://biostat.ufl.edu/education/phd-in-biostatistics/phd-how-to-apply/	https://web.archive.org/web/20200823203332/http://biostat.ufl.edu/education/phd-in-biostatistics/phd-how-to-apply/	X		X	X
University of Florida	Gainesville, FL	37 (tie)	2.9	Epidemiology	PhD		X	Fall 2021		-	In person	https://epidemiology.phhp.ufl.edu/admissions/apply/	https://web.archive.org/web/20200823203152/https://epidemiology.phhp.ufl.edu/admissions/apply/	X		X		X
University of Florida	Gainesville, FL	37 (tie)	2.9	Public Health: Environmental Health	PhD				X		In person	https://egh.phhp.ufl.edu/education/degree-programs/environmental-health-phd/		X		X			X
University of Florida	Gainesville, FL	37 (tie)	2.9	Public Health: Health Services Research	PhD			Fall 2020		optional	In person	https://hsrmp.phhp.ufl.edu/admissions/phd-application-information/	https://web.archive.org/web/20200823203523/https://hsrmp.phhp.ufl.edu/admissions/phd-application-information/	X		X				X
University of Florida	Gainesville, FL	37 (tie)	2.9	Public Health: One Health	PhD				X		In person	https://egh.phhp.ufl.edu/education/degree-programs/phd-in-one-health/		X		X
University of Florida	Gainesville, FL	37 (tie)	2.9	Public Health: Social and Behavioral Sciences	PhD				X		In person	https://phphd.phhp.ufl.edu/social-and-behavioral-sciences/		X		X					X
University of Kentucky	Lexington, KY	37 (tie)	2.9	Health Administration	MHA				X		In person	https://cph.uky.edu/academic-programs/master-health-administration		X	X
University of Kentucky	Lexington, KY	37 (tie)	2.9	Environmental Health	MPH				X		In person	https://cph.uky.edu/academic-programs/master-public-health/curriculum		X	X				X
University of Kentucky	Lexington, KY	37 (tie)	2.9	Epidemiology	MPH				X		In person	https://cph.uky.edu/academic-programs/master-public-health/curriculum		X	X			X
University of Kentucky	Lexington, KY	37 (tie)	2.9	Health Behavior	MPH				X		In person	https://cph.uky.edu/academic-programs/master-public-health/curriculum		X	X						X
University of Kentucky	Lexington, KY	37 (tie)	2.9	Health Systems and Policy Analytics	MPH				X		In person	https://cph.uky.edu/academic-programs/master-public-health/curriculum		X	X					X
University of Kentucky	Lexington, KY	37 (tie)	2.9	Health Systems and Policy Analytics	MPH				X		Online	https://www.uky.edu/academics/masters/public-health-mph-health-systems-policy-analytics-online		X	X					X
University of Southern California	Los Angeles, CA	37 (tie)	2.9	Biostatistics and Epidemiology	MPH				X		In person	https://preventivemedicine.usc.edu/education/graduate-programs/mph/mph-curriculum/mph-biostatistics-epidemiology/		X	X		X	X
University of Southern California	Los Angeles, CA	37 (tie)	2.9	Biostatistics and Epidemiology	MPH				X		Online	https://mphdegree.usc.edu/academics-overview/biostatistics-and-epidemiology/		X	X		X	X
University of Southern California	Los Angeles, CA	37 (tie)	2.9	Community Health Promotion	MPH				X		In person	https://preventivemedicine.usc.edu/education/graduate-programs/mph/mph-curriculum/mph-community-health-promotion/		X	X						X
University of Southern California	Los Angeles, CA	37 (tie)	2.9	Community Health Promotion	MPH				X		Online	https://mphdegree.usc.edu/academics-overview/health-education-and-promotion/		X	X						X
University of Southern California	Los Angeles, CA	37 (tie)	2.9	Generalist	MPH				X		Online	https://mphdegree.usc.edu/academics-overview/generalist-concentration/		X	X
University of Southern California	Los Angeles, CA	37 (tie)	2.9	GeoHealth	MPH				X		Online	https://mphdegree.usc.edu/academics-overview/geohealth/		X	X
University of Southern California	Los Angeles, CA	37 (tie)	2.9	Global Health	MPH				X		In person	https://preventivemedicine.usc.edu/education/graduate-programs/mph/mph-curriculum/mph-global-health/		X	X
University of Southern California	Los Angeles, CA	37 (tie)	2.9	Global Health	MPH				X		Online	https://mphdegree.usc.edu/academics-overview/global-health-leadership/		X	X
University of Southern California	Los Angeles, CA	37 (tie)	2.9	Health Services and Policy	MPH				X		In person	https://preventivemedicine.usc.edu/education/graduate-programs/mph/mph-curriculum/mph-health-services-and-policy/		X	X					X
University of Southern California	Los Angeles, CA	37 (tie)	2.9	Health Services and Policy	MPH				X		Online	https://mphdegree.usc.edu/academics-overview/public-health-policy/		X	X					X
University of Southern California	Los Angeles, CA	37 (tie)	2.9	Applied Biostatistics and Epidemiology	MS				X		In person	https://preventivemedicine.usc.edu/education/graduate-programs/ms-applied-biostatistics-epidemiology/		X	X		X	X
University of Southern California	Los Angeles, CA	37 (tie)	2.9	Biostatistics	MS				X		In person	https://preventivemedicine.usc.edu/education/graduate-programs/ms-biostatistics/		X	X		X
University of Southern California	Los Angeles, CA	37 (tie)	2.9	Clinical, Biomedical and Translational Investigations	MS				X		In person	https://preventivemedicine.usc.edu/education/graduate-programs/master-of-science-in-clinical-biomedical-and-translational-investigations/		X	X
University of Southern California	Los Angeles, CA	37 (tie)	2.9	Molecular Epidemiology	MS				X		In person	https://preventivemedicine.usc.edu/education/graduate-programs/ms-molecular-epidemiology/		X	X			X
University of Southern California	Los Angeles, CA	37 (tie)	2.9	Public Health Data Science	MS				X		In person	https://preventivemedicine.usc.edu/education/graduate-programs/ms-public-health-data-science/		X	X
University of Southern California	Los Angeles, CA	37 (tie)	2.9	Biostatistics	PhD				X		In person	https://preventivemedicine.usc.edu/education/graduate-programs/phd-biostatistics/		X		X	X
University of Southern California	Los Angeles, CA	37 (tie)	2.9	Epidemiology	PhD				X		In person	https://preventivemedicine.usc.edu/education/graduate-programs/phd-epidemiology/		X		X		X
University of Southern California	Los Angeles, CA	37 (tie)	2.9	Health Behavior Research	PhD				X		In person	https://phdhbr.usc.edu/		X		X					X
University of Southern California	Los Angeles, CA	37 (tie)	2.9	Population, Health and Place	PhD				X		In person	https://dornsife.usc.edu/soci/phd-in-population-place-and-health/		X		X
Vanderbilt University	Nashville, TN	37 (tie)	2.9	Epidemiology	MPH		X	Fall 2021, Fall 2020		optional	In person	https://medschool.vanderbilt.edu/mph/about/	https://web.archive.org/web/20200823232930/https://medschool.vanderbilt.edu/mph/admissions/	X	X			X
Vanderbilt University	Nashville, TN	37 (tie)	2.9	Global Health	MPH		X	Fall 2021, Fall 2020		optional	In person	https://medschool.vanderbilt.edu/mph/about/	https://web.archive.org/web/20200823232930/https://medschool.vanderbilt.edu/mph/admissions/	X	X
Vanderbilt University	Nashville, TN	37 (tie)	2.9	Health Policy	MPH		X	Fall 2021, Fall 2020		optional	In person	https://medschool.vanderbilt.edu/mph/about/	https://web.archive.org/web/20200823232930/https://medschool.vanderbilt.edu/mph/admissions/	X	X					X
Vanderbilt University	Nashville, TN	37 (tie)	2.9	Biostatistics	MS				X		In person	https://www.vanderbilt.edu/biostatistics-graduate/current-program/ms-program/		X	X		X
Vanderbilt University	Nashville, TN	37 (tie)	2.9	Biostatistics	PhD				X		In person	https://www.vanderbilt.edu/biostatistics-graduate/current-program/phd-program/		X		X	X
Vanderbilt University	Nashville, TN	37 (tie)	2.9	Epidemiology	PhD				X		In person	https://www.vumc.org/epi-phd/		X		X		X
Vanderbilt University	Nashville, TN	37 (tie)	2.9	Health Policy	PhD				X		In person	https://medschool.vanderbilt.edu/bret/health-policy/		X		X				X
Dartmouth College (Geisel)	Hanover, NH	46 (tie)	2.8	Public Health	MPH		X	Fall 2021		optional	In person	https://tdi.dartmouth.edu/education/degree-programs/masters-in-public-health/accelerated-campus/master-of-public-health	https://web.archive.org/web/20200823184455/https://tdi.dartmouth.edu/education/admissions/applying	X	X
Dartmouth College (Geisel)	Hanover, NH	46 (tie)	2.8	Public Health	MPH		X	Fall 2021		optional	Online	https://tdi.dartmouth.edu/education/degree-programs/masters-in-public-health/online/online-mph-programs	https://web.archive.org/web/20200823184455/https://tdi.dartmouth.edu/education/admissions/applying	X	X
Dartmouth College (Geisel)	Hanover, NH	46 (tie)	2.8	Healthcare Research	MS		X	Fall 2021		optional	In person	https://tdi.dartmouth.edu/education/degree-programs/master-science-healthcare-research/masters-degrees-in-healthcare-research	https://web.archive.org/web/20200823184455/https://tdi.dartmouth.edu/education/admissions/applying	X	X
Dartmouth College (Geisel)	Hanover, NH	46 (tie)	2.8	Health Policy and Clinical Practice	PhD		X	Fall 2021		optional	In person	https://tdi.dartmouth.edu/education/degree-programs/phd/health-policy-phd	https://web.archive.org/web/20200914005804/https://tdi.dartmouth.edu/education/degree-programs/phd/health-policy-phd	X		X				X
East Tennessee State University	Johnson City, TN	46 (tie)	2.8	Community Health	DrPH			Fall 2020		optional?	In person	https://www.etsu.edu/cph/academics/doctoral.php#tab-4-1	Removed before captured (removed before 2020/08/23)	X		X					X
East Tennessee State University	Johnson City, TN	46 (tie)	2.8	Epidemiology	DrPH			Fall 2020		optional?	In person	https://www.etsu.edu/cph/academics/doctoral.php#tab-4-1	Removed before captured (removed before 2020/08/23)	X		X		X
East Tennessee State University	Johnson City, TN	46 (tie)	2.8	Health Management and Policy	DrPH			Fall 2020		optional?	In person	https://www.etsu.edu/cph/academics/doctoral.php#tab-4-1	Removed before captured (removed before 2020/08/23)	X		X				X
East Tennessee State University	Johnson City, TN	46 (tie)	2.8	Biostatistics	MPH	X				optional	In person, online	https://www.etsu.edu/cph/academics/graduate.php	https://web.archive.org/web/20200830175353/https://catalog.etsu.edu/preview_program.php?catoid=37&poid=12622&returnto=1623	X	X		X
East Tennessee State University	Johnson City, TN	46 (tie)	2.8	Community Health	MPH	X				optional	In person, online	https://www.etsu.edu/cph/academics/graduate.php	https://web.archive.org/web/20200830175526/https://catalog.etsu.edu/preview_program.php?catoid=37&poid=12623&returnto=1623	X	X						X
East Tennessee State University	Johnson City, TN	46 (tie)	2.8	Environmental Health	MPH	X				optional	In person	https://www.etsu.edu/cph/academics/graduate.php	https://web.archive.org/web/20200830175637/https://catalog.etsu.edu/preview_program.php?catoid=37&poid=12624&returnto=1623	X	X				X
East Tennessee State University	Johnson City, TN	46 (tie)	2.8	Epidemiology	MPH	X				optional	In person, online	https://www.etsu.edu/cph/academics/graduate.php	https://web.archive.org/web/20200830175734/https://catalog.etsu.edu/preview_program.php?catoid=37&poid=12625&returnto=1623	X	X			X
East Tennessee State University	Johnson City, TN	46 (tie)	2.8	Public Health Administration	MPH	X				optional	In person, online	https://www.etsu.edu/cph/academics/graduate.php	https://web.archive.org/web/20200830175818/https://catalog.etsu.edu/preview_program.php?catoid=37&poid=12626&returnto=1623	X	X
Indiana University--Bloomington	Bloomington, IN	46 (tie)	2.8	Behavioral, Social, and Community Health	MPH	X				optional?	In person	https://publichealth.indiana.edu/academics/masters/mph/behavioral/index.html	https://web.archive.org/web/20200920042015/https://publichealth.indiana.edu/admissions/apply/graduate.html	X	X						X
Indiana University--Bloomington	Bloomington, IN	46 (tie)	2.8	Biostatistics	MPH	X				optional?	In person	https://publichealth.indiana.edu/academics/masters/mph/biostatistics/index.html	https://web.archive.org/web/20200920042015/https://publichealth.indiana.edu/admissions/apply/graduate.html	X	X		X
Indiana University--Bloomington	Bloomington, IN	46 (tie)	2.8	Environmental Health	MPH	X				optional?	In person	https://publichealth.indiana.edu/academics/masters/mph/environmental-health/index.html	https://web.archive.org/web/20200920042015/https://publichealth.indiana.edu/admissions/apply/graduate.html	X	X				X
Indiana University--Bloomington	Bloomington, IN	46 (tie)	2.8	Epidemiology	MPH	X				optional?	In person	https://publichealth.indiana.edu/academics/masters/mph/epidemiology/index.html	https://web.archive.org/web/20200920042015/https://publichealth.indiana.edu/admissions/apply/graduate.html	X	X			X
Indiana University--Bloomington	Bloomington, IN	46 (tie)	2.8	Parks and Recreation	MPH	X				optional?	Online	https://publichealth.indiana.edu/academics/masters/mph/parks-rec-online/index.html	https://web.archive.org/web/20200920042015/https://publichealth.indiana.edu/admissions/apply/graduate.html	X	X
Indiana University--Bloomington	Bloomington, IN	46 (tie)	2.8	Physical Activity	MPH	X				optional?	In person	https://publichealth.indiana.edu/academics/masters/mph/physical-activity/index.html	https://web.archive.org/web/20200920042015/https://publichealth.indiana.edu/admissions/apply/graduate.html	X	X
Indiana University--Bloomington	Bloomington, IN	46 (tie)	2.8	Public Health Administration	MPH	X				optional?	In person	https://publichealth.indiana.edu/academics/masters/mph/administration/index.html	https://web.archive.org/web/20200920042015/https://publichealth.indiana.edu/admissions/apply/graduate.html	X	X
Indiana University--Bloomington	Bloomington, IN	46 (tie)	2.8	Applied Health Science: Nutrition Science	MS				X		In person	https://publichealth.indiana.edu/academics/masters/ms-applied-health/nutrition-science/index.html		X	X
Indiana University--Bloomington	Bloomington, IN	46 (tie)	2.8	Applied Health Science: Online Safety Management	MS				X		In person	https://mypublichealthdirect.indiana.edu/programs/applied-health.html		X	X					X
Indiana University--Bloomington	Bloomington, IN	46 (tie)	2.8	Applied Health Science: School and College Health Education	MS				X		In person	https://publichealth.indiana.edu/academics/masters/ms-applied-health/college-education/index.html		X	X						X
Indiana University--Bloomington	Bloomington, IN	46 (tie)	2.8	Environmental and Occupational Health	MS				X		In person	https://publichealth.indiana.edu/academics/masters/ms-environmental/index.html		X	X				X
Indiana University--Bloomington	Bloomington, IN	46 (tie)	2.8	Environmental Health	PhD				X		In person	https://publichealth.indiana.edu/academics/doctoral/phd-environmental-health/index.html		X		X			X
Indiana University--Bloomington	Bloomington, IN	46 (tie)	2.8	Epidemiology	PhD				X		In person	https://publichealth.indiana.edu/academics/doctoral/phd-epidemiology/index.html		X		X		X
Indiana University--Bloomington	Bloomington, IN	46 (tie)	2.8	Health Behavior	PhD				X		In person	https://publichealth.indiana.edu/academics/doctoral/phd-health-behavior/index.html		X		X					X
Indiana University--Bloomington	Bloomington, IN	46 (tie)	2.8	Human Performance	PhD				X		In person	https://publichealth.indiana.edu/academics/doctoral/phd-human-performance/index.html		X		X
Indiana University--Bloomington	Bloomington, IN	46 (tie)	2.8	Leisure Behavior	PhD				X		In person	https://publichealth.indiana.edu/academics/doctoral/phd-leisure-behavior/index.html		X		X
St. Louis University	St. Louis, MO	46 (tie)	2.8	Health Administration	MHA	X				-	Hybrid, online	https://www.slu.edu/public-health-social-justice/education/graduate/health-adminstration-emha.php	https://web.archive.org/web/20200830181050/https://www.slu.edu/public-health-social-justice/education/graduate/health-adminstration-emha.php	X	X
St. Louis University	St. Louis, MO	46 (tie)	2.8	Health Administration	MHA	X				-	In person	https://www.slu.edu/public-health-social-justice/education/graduate/health-adminstration-mha.php	https://web.archive.org/web/20200830180946/https://www.slu.edu/public-health-social-justice/education/graduate/health-adminstration-mha.php	X	X
St. Louis University	St. Louis, MO	46 (tie)	2.8	Behavioral Science and Health Education	MPH	X				-	In person	https://slu.edu/public-health-social-justice/education/graduate/public-health/	https://web.archive.org/web/20200830180735/https://www.slu.edu/public-health-social-justice/education/graduate/public-health/	X	X						X
St. Louis University	St. Louis, MO	46 (tie)	2.8	Biosecurity and Disaster Preparedness	MPH	X				-	In person, online	https://slu.edu/public-health-social-justice/education/graduate/public-health/	https://web.archive.org/web/20200830180735/https://www.slu.edu/public-health-social-justice/education/graduate/public-health/	X	X
St. Louis University	St. Louis, MO	46 (tie)	2.8	Biostatistics	MPH	X				-	In person	https://slu.edu/public-health-social-justice/education/graduate/public-health/	https://web.archive.org/web/20200830180735/https://www.slu.edu/public-health-social-justice/education/graduate/public-health/	X	X		X
St. Louis University	St. Louis, MO	46 (tie)	2.8	Epidemiology	MPH	X				-	In person	https://slu.edu/public-health-social-justice/education/graduate/public-health/	https://web.archive.org/web/20200830180735/https://www.slu.edu/public-health-social-justice/education/graduate/public-health/	X	X			X
St. Louis University	St. Louis, MO	46 (tie)	2.8	Global Health	MPH	X				-	In person	https://slu.edu/public-health-social-justice/education/graduate/public-health/	https://web.archive.org/web/20200830180735/https://www.slu.edu/public-health-social-justice/education/graduate/public-health/	X	X
St. Louis University	St. Louis, MO	46 (tie)	2.8	Health Management and Policy	MPH	X				-	In person	https://slu.edu/public-health-social-justice/education/graduate/public-health/	https://web.archive.org/web/20200830180735/https://www.slu.edu/public-health-social-justice/education/graduate/public-health/	X	X					X
St. Louis University	St. Louis, MO	46 (tie)	2.8	Maternal and Child Health	MPH	X				-	In person	https://slu.edu/public-health-social-justice/education/graduate/public-health/	https://web.archive.org/web/20200830180735/https://www.slu.edu/public-health-social-justice/education/graduate/public-health/	X	X
St. Louis University	St. Louis, MO	46 (tie)	2.8	Public Health Practice	MPH	X				-	In person	https://slu.edu/public-health-social-justice/education/graduate/public-health/	https://web.archive.org/web/20200830180735/https://www.slu.edu/public-health-social-justice/education/graduate/public-health/	X	X
St. Louis University	St. Louis, MO	46 (tie)	2.8	Biostatistics and Health Analytics	MS				X		In person	https://www.slu.edu/public-health-social-justice/education/graduate/biostatistics-health-analytics-ms.php		X	X		X
St. Louis University	St. Louis, MO	46 (tie)	2.8	Public Health	MS				X		In person	https://www.slu.edu/public-health-social-justice/education/graduate/public-health-ms.php		X	X
St. Louis University	St. Louis, MO	46 (tie)	2.8	Public Health Studies	PhD	X				-	In person	https://www.slu.edu/public-health-social-justice/education/graduate/public-health-studies-phd.php	https://web.archive.org/web/20200830181324/https://www.slu.edu/public-health-social-justice/education/graduate/public-health-studies-phd.php	X		X
Temple University	Philadelphia, PA	46 (tie)	2.8	Applied Biostatistics	MPH	X				-	In person	https://www.temple.edu/academics/degree-programs/applied-biostatistics-mph-hp-apbs-mph	https://web.archive.org/web/20200830181756/https://www.temple.edu/academics/degree-programs/graduate-programs/applied-biostatistics-mph-apbs/applied-biostatistics-mph-admissions-information	X	X		X
Temple University	Philadelphia, PA	46 (tie)	2.8	Environmental Health	MPH	X				-	In person	https://www.temple.edu/academics/degree-programs/environmental-health-mph-hp-envh-mph	https://web.archive.org/web/20200522082337/https://www.temple.edu/academics/degree-programs/graduate-programs/environmental-health-mph-envh/environmental-health-mph-admissions-information	X	X				X
Temple University	Philadelphia, PA	46 (tie)	2.8	Epidemiology	MPH	X				-	In person	https://www.temple.edu/academics/degree-programs/epidemiology-mph-hp-epid-mph	https://web.archive.org/web/20200522084945/https://www.temple.edu/academics/degree-programs/graduate-programs/epidemiology-mph-epid/epidemiology-mph-admissions-information	X	X			X
Temple University	Philadelphia, PA	46 (tie)	2.8	Health Policy and Management	MPH	X				-	In person	https://www.temple.edu/academics/degree-programs/health-policy-and-management-mph-hp-hpam-mph	https://web.archive.org/web/20200522143004/https://www.temple.edu/academics/degree-programs/graduate-programs/health-policy-and-management-mph-hpam/health-policy-and-management-mph-admissions-information	X	X					X
Temple University	Philadelphia, PA	46 (tie)	2.8	Social and Behavioral Sciences	MPH	X				-	In person	https://www.temple.edu/academics/degree-programs/social-and-behavioral-sciences-mph-hp-sbsc-mph	https://web.archive.org/web/20200523085424/https://www.temple.edu/academics/degree-programs/graduate-programs/social-and-behavioral-sciences-mph-sbsc/social-and-behavioral-sciences-mph-admissions-information	X	X						X
Temple University	Philadelphia, PA	46 (tie)	2.8	Epidemiology	MS				X		In person	https://www.temple.edu/academics/degree-programs/epidemiology-ms-hp-epid-ms		X	X			X
Temple University	Philadelphia, PA	46 (tie)	2.8	Health Informatics	MS	X				-	In person	https://www.temple.edu/academics/degree-programs/health-informatics-ms-hp-hlti-ms	https://web.archive.org/web/20200522134541/https://www.temple.edu/academics/degree-programs/health-informatics-ms-hp-hlti-ms/health-informatics-ms-admissions-information	X	X
Temple University	Philadelphia, PA	46 (tie)	2.8	Epidemiology	PhD				X		In person	https://www.temple.edu/academics/degree-programs/graduate-programs/epidemiology-phd-epid/epidemiology-phd-admissions-information		X		X		X
Temple University	Philadelphia, PA	46 (tie)	2.8	Health Policy and Health Services Research	PhD				X		In person	https://www.temple.edu/academics/degree-programs/health-policy-and-health-services-research-phd-hp-hphs-phd		X		X				X
Temple University	Philadelphia, PA	46 (tie)	2.8	Social and Behavioral Sciences	PhD				X		In person	https://www.temple.edu/academics/degree-programs/social-and-behavioral-sciences-phd-hp-sbsc-phd		X		X					X
University at Albany--SUNY	Rensselaer, NY	46 (tie)	2.8	Environmental Health Sciences	DrPH	X				optional	In person	https://www.albany.edu/sph/programs/drph-public-health#programofstudy	https://web.archive.org/web/20200719205341/https://www.albany.edu/sph/programs/drph-public-health	X		X			X
University at Albany--SUNY	Rensselaer, NY	46 (tie)	2.8	Epidemiology and Biostatistics	DrPH	X				optional	In person	https://www.albany.edu/sph/programs/drph-public-health#programofstudy	https://web.archive.org/web/20200719205341/https://www.albany.edu/sph/programs/drph-public-health	X		X	X	X
University at Albany--SUNY	Rensselaer, NY	46 (tie)	2.8	Health Policy, Management, and Behavior	DrPH	X				optional	In person	https://www.albany.edu/sph/programs/drph-public-health#programofstudy	https://web.archive.org/web/20200719205341/https://www.albany.edu/sph/programs/drph-public-health	X		X				X
University at Albany--SUNY	Rensselaer, NY	46 (tie)	2.8	Biostatistics	MPH	X				-	In person	https://www.albany.edu/sph/programs/mph-public-health	https://web.archive.org/web/20200725075236/https://www.albany.edu/sph/programs/mph-public-health#collapse-accordion-46146-2	X	X		X
University at Albany--SUNY	Rensselaer, NY	46 (tie)	2.8	Environmental Health	MPH	X				-	In person	https://www.albany.edu/sph/programs/mph-public-health	https://web.archive.org/web/20200725075236/https://www.albany.edu/sph/programs/mph-public-health#collapse-accordion-46146-2	X	X				X
University at Albany--SUNY	Rensselaer, NY	46 (tie)	2.8	Epidemiology	MPH	X				-	In person	https://www.albany.edu/sph/programs/mph-public-health	https://web.archive.org/web/20200725075236/https://www.albany.edu/sph/programs/mph-public-health#collapse-accordion-46146-2	X	X			X
University at Albany--SUNY	Rensselaer, NY	46 (tie)	2.8	Health Policy and Management	MPH	X				-	In person	https://www.albany.edu/sph/programs/mph-public-health	https://web.archive.org/web/20200725075236/https://www.albany.edu/sph/programs/mph-public-health#collapse-accordion-46146-2	X	X					X
University at Albany--SUNY	Rensselaer, NY	46 (tie)	2.8	Nutrition	MPH	X				-	In person	https://www.albany.edu/sph/programs/mph-public-health	https://web.archive.org/web/20200725075236/https://www.albany.edu/sph/programs/mph-public-health#collapse-accordion-46146-2	X	X
University at Albany--SUNY	Rensselaer, NY	46 (tie)	2.8	Public Health	MPH	X				-	Online	https://www.albany.edu/sph/programs/mph-public-health-online	https://web.archive.org/web/20200801042424/https://www.albany.edu/sph/programs/mph-public-health-online	X	X
University at Albany--SUNY	Rensselaer, NY	46 (tie)	2.8	Social Behavior and Community Health	MPH	X				-	In person	https://www.albany.edu/sph/programs/mph-public-health	https://web.archive.org/web/20200725075236/https://www.albany.edu/sph/programs/mph-public-health#collapse-accordion-46146-2	X	X						X
University at Albany--SUNY	Rensselaer, NY	46 (tie)	2.8	Biostatistics	MS				X		In person	https://www.albany.edu/sph/programs/ms-biostatistics		X	X		X
University at Albany--SUNY	Rensselaer, NY	46 (tie)	2.8	Environmental Health	MS				X		In person	https://www.albany.edu/sph/programs/ms-environmental-health		X	X				X
University at Albany--SUNY	Rensselaer, NY	46 (tie)	2.8	Epidemiology	MS				X		In person	https://www.albany.edu/sph/programs/ms-epidemiology		X	X			X
University at Albany--SUNY	Rensselaer, NY	46 (tie)	2.8	Biostatistics	PhD				X		In person	https://www.albany.edu/sph/programs/phd-biostatistics		X		X	X
University at Albany--SUNY	Rensselaer, NY	46 (tie)	2.8	Environmental Health	PhD				X		In person	https://www.albany.edu/sph/programs/phd-environmental-health		X		X			X
University at Albany--SUNY	Rensselaer, NY	46 (tie)	2.8	Epidemiology	PhD				X		In person	https://www.albany.edu/sph/programs/phd-epidemiology		X		X		X
University of Georgia	Athens, GA	46 (tie)	2.8	Public Health	DrPH	X				optional	In person	https://publichealth.uga.edu/degree/doctor-of-public-health-drph/	https://web.archive.org/web/20200830185635/https://publichealth.uga.edu/degree/doctor-of-public-health-drph/	X		X
University of Georgia	Athens, GA	46 (tie)	2.8	Healthcare Administration	MHA	X				optional	In person	https://publichealth.uga.edu/degree/master-of-health-administration-mha/	https://web.archive.org/web/20200830185730/https://publichealth.uga.edu/degree/master-of-health-administration-mha/	X	X
University of Georgia	Athens, GA	46 (tie)	2.8	Biostatistics	MPH			Spring 2021, Fall 2020		optional?	In person	https://publichealth.uga.edu/degree/master-of-public-health-mph/	https://web.archive.org/web/20200823203645/https://publichealth.uga.edu/degree/master-of-public-health-mph/ , https://web.archive.org/web/20200615173736/https://publichealth.uga.edu/degree/master-of-public-health-mph/	X	X		X
University of Georgia	Athens, GA	46 (tie)	2.8	Disaster Management	MPH			Spring 2021, Fall 2020		optional?	In person	https://publichealth.uga.edu/degree/master-of-public-health-mph/	https://web.archive.org/web/20200823203645/https://publichealth.uga.edu/degree/master-of-public-health-mph/ , https://web.archive.org/web/20200615173736/https://publichealth.uga.edu/degree/master-of-public-health-mph/	X	X
University of Georgia	Athens, GA	46 (tie)	2.8	Environmental Health Science	MPH			Spring 2021, Fall 2020		optional?	In person	https://publichealth.uga.edu/degree/master-of-public-health-mph/	https://web.archive.org/web/20200823203645/https://publichealth.uga.edu/degree/master-of-public-health-mph/ , https://web.archive.org/web/20200615173736/https://publichealth.uga.edu/degree/master-of-public-health-mph/	X	X				X
University of Georgia	Athens, GA	46 (tie)	2.8	Epidemiology	MPH			Spring 2021, Fall 2020		optional?	In person	https://publichealth.uga.edu/degree/master-of-public-health-mph/	https://web.archive.org/web/20200823203645/https://publichealth.uga.edu/degree/master-of-public-health-mph/ , https://web.archive.org/web/20200615173736/https://publichealth.uga.edu/degree/master-of-public-health-mph/	X	X			X
University of Georgia	Athens, GA	46 (tie)	2.8	Gerontology	MPH			Spring 2021, Fall 2020		optional?	In person	https://publichealth.uga.edu/degree/master-of-public-health-mph/	https://web.archive.org/web/20200823203645/https://publichealth.uga.edu/degree/master-of-public-health-mph/ , https://web.archive.org/web/20200615173736/https://publichealth.uga.edu/degree/master-of-public-health-mph/	X	X
University of Georgia	Athens, GA	46 (tie)	2.8	Heath Policy and Management	MPH			Spring 2021, Fall 2020		optional?	In person	https://publichealth.uga.edu/degree/master-of-public-health-mph/	https://web.archive.org/web/20200823203645/https://publichealth.uga.edu/degree/master-of-public-health-mph/ , https://web.archive.org/web/20200615173736/https://publichealth.uga.edu/degree/master-of-public-health-mph/	X	X					X
University of Georgia	Athens, GA	46 (tie)	2.8	Heath Promotion and Behavior	MPH			Spring 2021, Fall 2020		optional?	In person	https://publichealth.uga.edu/degree/master-of-public-health-mph/	https://web.archive.org/web/20200823203645/https://publichealth.uga.edu/degree/master-of-public-health-mph/ , https://web.archive.org/web/20200615173736/https://publichealth.uga.edu/degree/master-of-public-health-mph/	X	X						X
University of Georgia	Athens, GA	46 (tie)	2.8	Environmental Health	MS	X				optional	In person	https://publichealth.uga.edu/degree/m-s-in-environmental-health/	https://web.archive.org/web/20200830185459/https://publichealth.uga.edu/degree/m-s-in-environmental-health/	X	X				X
University of Georgia	Athens, GA	46 (tie)	2.8	Epidemiology and Biostatistics	MS				X		In person	https://publichealth.uga.edu/degree/ms-phd-in-epidemiology-biostatistics/		X	X		X	X
University of Georgia	Athens, GA	46 (tie)	2.8	Environmental Health	PhD	X				optional	In person	https://publichealth.uga.edu/degree/ph-d-in-environmental-health/	https://web.archive.org/web/20200830185419/https://publichealth.uga.edu/degree/ph-d-in-environmental-health/	X		X			X
University of Georgia	Athens, GA	46 (tie)	2.8	Epidemiology and Biostatistics	PhD				X		In person	https://publichealth.uga.edu/degree/ms-phd-in-epidemiology-biostatistics/		X		X	X	X
University of Georgia	Athens, GA	46 (tie)	2.8	Health Promotion	PhD				X		In person	https://publichealth.uga.edu/degree/ph-d-in-health-promotion/		X		X					X
University of Wisconsin--Madison	Madison, WI	46 (tie)	2.8	Public Health	MPH		X	Fall 2021		optional	In person	https://www.med.wisc.edu/education/master-of-public-health-mph/	https://archive.vn/DqfGj	X	X
University of Wisconsin--Madison	Madison, WI	46 (tie)	2.8	Biomedical Data Science	MS				X		In person	https://biostat.wisc.edu/education/ms-bds/		X	X
University of Wisconsin--Madison	Madison, WI	46 (tie)	2.8	Clinical and Health Informatics	MS	X				-	Online	https://uwinformatics.wisc.edu/	https://web.archive.org/web/20200612122327/https://uwinformatics.wisc.edu/apply-now/	X	X
University of Wisconsin--Madison	Madison, WI	46 (tie)	2.8	Epidemiology	MS		X	Fall 2021		optional	In person	https://pophealth.wisc.edu/ms-and-phd-in-epidemiology/	https://web.archive.org/web/20200914010514/https://pophealth.wisc.edu/degree-programs/admissions-and-aid/	X	X			X
University of Wisconsin--Madison	Madison, WI	46 (tie)	2.8	Molecular and Environmental Toxicology	MS	X				optional	In person	https://metc.wisc.edu/	https://archive.vn/FAcsY	X	X				X
University of Wisconsin--Madison	Madison, WI	46 (tie)	2.8	Population Health	MS		X	Fall 2021		-	In person	https://pophealth.wisc.edu/ms-phd-degree-programs-in-population-health/	https://web.archive.org/web/20200914010514/https://pophealth.wisc.edu/degree-programs/admissions-and-aid/	X	X
University of Wisconsin--Madison	Madison, WI	46 (tie)	2.8	Biomedical Data Science	PhD				X		In person	https://biostat.wisc.edu/education/phd-bds/		X		X
University of Wisconsin--Madison	Madison, WI	46 (tie)	2.8	Epidemiology	PhD		X	Fall 2021		optional	In person	https://pophealth.wisc.edu/ms-and-phd-in-epidemiology/	https://web.archive.org/web/20200914010514/https://pophealth.wisc.edu/degree-programs/admissions-and-aid/	X		X		X
University of Wisconsin--Madison	Madison, WI	46 (tie)	2.8	Molecular and Environmental Toxicology	PhD	X				optional	In person	https://metc.wisc.edu/	https://archive.vn/FAcsY	X		X			X
University of Wisconsin--Madison	Madison, WI	46 (tie)	2.8	Population Health	PhD		X	Fall 2021		-	In person	https://pophealth.wisc.edu/ms-phd-degree-programs-in-population-health/	https://web.archive.org/web/20200914010514/https://pophealth.wisc.edu/degree-programs/admissions-and-aid/	X		X
Oregon State University	Corvallis, OR	54 (tie)	2.7	Biostatistics	MPH				X		In person	https://health.oregonstate.edu/biostatistics/mph		X	X		X
Oregon State University	Corvallis, OR	54 (tie)	2.7	Environmental and Occupational Health	MPH				X		In person	https://health.oregonstate.edu/eoh		X	X				X
Oregon State University	Corvallis, OR	54 (tie)	2.7	Epidemiology	MPH				X		In person	https://health.oregonstate.edu/epi/mph		X	X			X
Oregon State University	Corvallis, OR	54 (tie)	2.7	Global Health	MPH				X		In person	https://health.oregonstate.edu/gh/mph		X	X
Oregon State University	Corvallis, OR	54 (tie)	2.7	Health Management and Policy	MPH				X		In person	https://health.oregonstate.edu/hmp/mph		X	X					X
Oregon State University	Corvallis, OR	54 (tie)	2.7	Health Promotion and Health Behavior	MPH				X		In person	https://health.oregonstate.edu/hphb/mph		X	X						X
Oregon State University	Corvallis, OR	54 (tie)	2.7	Physical Activity	MPH				X		In person	https://health.oregonstate.edu/physical-activity/mph		X	X
Oregon State University	Corvallis, OR	54 (tie)	2.7	Nutrition	MS				X		In person	https://health.oregonstate.edu/nutrition/graduate/ms		X	X
Oregon State University	Corvallis, OR	54 (tie)	2.7	Environmental and Occupational Health	PhD				X		In person	https://health.oregonstate.edu/eoh		X		X			X
Oregon State University	Corvallis, OR	54 (tie)	2.7	Epidemiology	PhD				X		In person	https://health.oregonstate.edu/epi/phd		X		X		X
Oregon State University	Corvallis, OR	54 (tie)	2.7	Global Health	PhD				X		In person	https://health.oregonstate.edu/gh/phd		X		X
Oregon State University	Corvallis, OR	54 (tie)	2.7	Health Management and Policy	PhD				X		In person	https://health.oregonstate.edu/hmp/phd		X		X				X
Oregon State University	Corvallis, OR	54 (tie)	2.7	Health Promotion and Health Behavior	PhD				X		In person	https://health.oregonstate.edu/hphb/phd		X		X					X
Oregon State University	Corvallis, OR	54 (tie)	2.7	Nutrition	PhD				X		In person	https://health.oregonstate.edu/nutrition/graduate/phd		X		X
University of Louisville	Louisville, KY	54 (tie)	2.7	Biostatistics	MPH			Fall 2020		optional	In person	https://louisville.edu/sphis/academics/mph-program	https://web.archive.org/web/20200824003012/https://louisville.edu/sphis/academics/admissions	X	X		X
University of Louisville	Louisville, KY	54 (tie)	2.7	Epidemiology	MPH			Fall 2020		optional	In person	https://louisville.edu/sphis/academics/mph-program	https://web.archive.org/web/20200824003012/https://louisville.edu/sphis/academics/admissions	X	X			X
University of Louisville	Louisville, KY	54 (tie)	2.7	Global Health	MPH			Fall 2020		optional	In person	https://louisville.edu/sphis/academics/mph-program	https://web.archive.org/web/20200824003012/https://louisville.edu/sphis/academics/admissions	X	X
University of Louisville	Louisville, KY	54 (tie)	2.7	Health Policy	MPH			Fall 2020		optional	In person	https://louisville.edu/sphis/academics/mph-program	https://web.archive.org/web/20200824003012/https://louisville.edu/sphis/academics/admissions	X	X					X
University of Louisville	Louisville, KY	54 (tie)	2.7	Health Promotion and Behavioral Sciences	MPH			Fall 2020		optional	In person	https://louisville.edu/sphis/academics/mph-program	https://web.archive.org/web/20200824003012/https://louisville.edu/sphis/academics/admissions	X	X						X
University of Louisville	Louisville, KY	54 (tie)	2.7	Biostatistics	MS			Fall 2020		optional	In person	https://louisville.edu/sphis/departments/bioinformatics-biostatistics/academics/ms	https://web.archive.org/web/20200824003012/https://louisville.edu/sphis/academics/admissions	X	X		X
University of Louisville	Louisville, KY	54 (tie)	2.7	Biostatistics	MS		X	Fall 2021, Fall 2020		optional	Online	https://louisville.edu/online/programs/masters/master-of-science-in-biostatistics	https://web.archive.org/web/20200824003716/https://louisville.edu/online/programs/masters/master-of-science-in-biostatistics , https://web.archive.org/web/20200824003012/https://louisville.edu/sphis/academics/admissions	X	X		X
University of Louisville	Louisville, KY	54 (tie)	2.7	Clinical Investigation Sciences	MS				X		In person	https://louisville.edu/sphis/academics/admissions-requirements-1/msc-in-clinical-investigation-sciences-admission-requirements		X	X
University of Louisville	Louisville, KY	54 (tie)	2.7	Epidemiology	MS	X				optional	In person	https://louisville.edu/sphis/departments/eph/academics	https://archive.vn/xTcmC	X	X			X
University of Louisville	Louisville, KY	54 (tie)	2.7	Health Administration	MS			Fall 2020		optional	In person	https://louisville.edu/sphis/departments/hmss/academics-1/ms-in-health-administration	https://web.archive.org/web/20200824003012/https://louisville.edu/sphis/academics/admissions	X	X
University of Louisville	Louisville, KY	54 (tie)	2.7	Health Administration	MS	X				-	Online	https://louisville.edu/online/programs/masters/online-master-of-science-in-health-administration	https://archive.vn/cyZNF , https://web.archive.org/web/20200830201855if_/https://louisville.edu/online/programs/masters/online-master-of-science-in-health-administration/online-master-of-science-in-health-administration/#apply	X	X
University of Louisville	Louisville, KY	54 (tie)	2.7	Health Data Analytics	MS			Fall 2020		optional	In person	https://louisville.edu/sphis/departments/hmss/academics-1/ms-in-health-data-analytics	https://web.archive.org/web/20200824003012/https://louisville.edu/sphis/academics/admissions	X	X
University of Louisville	Louisville, KY	54 (tie)	2.7	Health Data Analytics	MS		X	Fall 2021, Fall 2020		optional	Online	https://louisville.edu/online/programs/masters/master-of-science-in-health-data-analytics	https://web.archive.org/web/20200824003834/https://louisville.edu/online/programs/masters/master-of-science-in-health-data-analytics , https://web.archive.org/web/20200824003012/https://louisville.edu/sphis/academics/admissions	X	X
University of Louisville	Louisville, KY	54 (tie)	2.7	Biostatistics	PhD				X		In person	https://louisville.edu/sphis/departments/bioinformatics-biostatistics/prospective-students		X		X	X
University of Louisville	Louisville, KY	54 (tie)	2.7	Public Health Sciences: Environmental Health	PhD				X		In person	https://louisville.edu/sphis/academics/admissions-requirements-1/phd-in-public-health-sciences-in-environmental-health-admission-requirements		X		X			X
University of Louisville	Louisville, KY	54 (tie)	2.7	Public Health Sciences: Epidemiology	PhD			Fall 2020		optional	In person	https://louisville.edu/sphis/departments/eph/academics	https://web.archive.org/web/20200824003012/https://louisville.edu/sphis/academics/admissions	X		X		X
University of Louisville	Louisville, KY	54 (tie)	2.7	Public Health Sciences: Health Management and Policy	PhD			Fall 2020		optional	In person	https://louisville.edu/sphis/departments/hmss/academics-1/phd-health-management-policy	https://web.archive.org/web/20200824003012/https://louisville.edu/sphis/academics/admissions	X		X				X
University of Louisville	Louisville, KY	54 (tie)	2.7	Public Health Sciences: Health Promotion and Behavioral Sciences	PhD			Fall 2020		optional	In person	https://louisville.edu/sphis/departments/hpbs/academics	https://web.archive.org/web/20200824003012/https://louisville.edu/sphis/academics/admissions	X		X					X
Georgia State University	Atlanta, GA	56 (tie)	2.6	Public Health	DrPH				X		In person	https://publichealth.gsu.edu/academics-student-life/degrees-programs/drph/		X		X
Georgia State University	Atlanta, GA	56 (tie)	2.6	Biostatistics	MPH			Spring 2021, Fall 2020		optional	In person	https://publichealth.gsu.edu/academics-student-life/graduate-divisions/graduate-studies-epidemiology-biostatistics/#Biostatistics	https://web.archive.org/web/20200823190248/https://publichealth.gsu.edu/academics-student-life/degrees-programs/mph-how-to-apply/	X	X		X
Georgia State University	Atlanta, GA	56 (tie)	2.6	Environmental Epidemiology	MPH			Spring 2021, Fall 2020		optional	In person	https://publichealth.gsu.edu/academics-student-life/degrees-programs/environmental-epidemiology-mph/	https://web.archive.org/web/20200823190248/https://publichealth.gsu.edu/academics-student-life/degrees-programs/mph-how-to-apply/	X	X			X	X
Georgia State University	Atlanta, GA	56 (tie)	2.6	Environmental Health	MPH			Spring 2021, Fall 2020		optional	In person	https://publichealth.gsu.edu/academics-student-life/graduate-divisions/graduate-studies-environmental-health/#MPH	https://web.archive.org/web/20200823190248/https://publichealth.gsu.edu/academics-student-life/degrees-programs/mph-how-to-apply/	X	X				X
Georgia State University	Atlanta, GA	56 (tie)	2.6	Epidemiology	MPH			Spring 2021, Fall 2020		optional	In person	https://publichealth.gsu.edu/academics-student-life/graduate-divisions/graduate-studies-epidemiology-biostatistics/#Epidemiology	https://web.archive.org/web/20200823190248/https://publichealth.gsu.edu/academics-student-life/degrees-programs/mph-how-to-apply/	X	X			X
Georgia State University	Atlanta, GA	56 (tie)	2.6	Health Management and Policy	MPH			Spring 2021, Fall 2020		optional	In person	https://publichealth.gsu.edu/academics-student-life/graduate-divisions/graduate-studies-health-management-policy/#MPH	https://web.archive.org/web/20200823190248/https://publichealth.gsu.edu/academics-student-life/degrees-programs/mph-how-to-apply/	X	X					X
Georgia State University	Atlanta, GA	56 (tie)	2.6	Health Promotion and Behavior	MPH			Spring 2021, Fall 2020		optional	In person	https://publichealth.gsu.edu/academics-student-life/graduate-divisions/graduate-studies-health-promotion-behavior/#MPH	https://web.archive.org/web/20200823190248/https://publichealth.gsu.edu/academics-student-life/degrees-programs/mph-how-to-apply/	X	X						X
Georgia State University	Atlanta, GA	56 (tie)	2.6	Environmental Health	PhD				X		In person	https://publichealth.gsu.edu/academics-student-life/graduate-divisions/graduate-studies-environmental-health/#PhD		X		X			X
Georgia State University	Atlanta, GA	56 (tie)	2.6	Epidemiology	PhD				X		In person	https://publichealth.gsu.edu/academics-student-life/graduate-divisions/graduate-studies-epidemiology-biostatistics/#EpiPhD		X		X		X
Georgia State University	Atlanta, GA	56 (tie)	2.6	Health Promotion and Behavior	PhD				X		In person	https://publichealth.gsu.edu/academics-student-life/graduate-divisions/graduate-studies-health-promotion-behavior/#PhD		X		X					X
Georgia State University	Atlanta, GA	56 (tie)	2.6	Health Services and Policy Research	PhD				X		In person	https://publichealth.gsu.edu/academics-student-life/graduate-divisions/graduate-studies-health-management-policy/#PhD		X		X				X
Loma Linda University	Loma Linda, CA	56 (tie)	2.6	Health Education	DrPH				X		In person	https://publichealth.llu.edu/academics/doctoral-programs/drph-health-education		X		X					X
Loma Linda University	Loma Linda, CA	56 (tie)	2.6	Health Policy and Leadership	DrPH				X		In person	https://publichealth.llu.edu/academics/doctoral-programs/drph-health-policy-and-leadership		X		X				X
Loma Linda University	Loma Linda, CA	56 (tie)	2.6	Preventive Care	DrPH				X		In person, online	https://publichealth.llu.edu/academics/doctoral-programs/drph-preventive-care		X		X
Loma Linda University	Loma Linda, CA	56 (tie)	2.6	Healthcare Administration	MHA	X				-	In person	https://publichealth.llu.edu/academics/master-healthcare-administration	https://web.archive.org/web/20200830204756/https://publichealth.llu.edu/admissions	X	X
Loma Linda University	Loma Linda, CA	56 (tie)	2.6	Epidemiology	MPH	X				-	In person	https://publichealth.llu.edu/epi	https://web.archive.org/web/20200830204756/https://publichealth.llu.edu/admissions	X	X			X
Loma Linda University	Loma Linda, CA	56 (tie)	2.6	Global Health	MPH	X				-	In person	https://publichealth.llu.edu/academics/mph/mph-global-health	https://web.archive.org/web/20200830204756/https://publichealth.llu.edu/admissions	X	X
Loma Linda University	Loma Linda, CA	56 (tie)	2.6	Health Education and Wellness Coaching	MPH	X				-	In person, online	https://publichealth.llu.edu/HealthEd	https://web.archive.org/web/20200830204756/https://publichealth.llu.edu/admissions	X	X						X
Loma Linda University	Loma Linda, CA	56 (tie)	2.6	Nutrition with Coordinated program in Dietetics	MPH	X				-	In person	https://publichealth.llu.edu/academics/mph/mph-nutrition-coordinated-program-dietetics#MPH_Nutrition-with-Dietetics	https://web.archive.org/web/20200830204756/https://publichealth.llu.edu/admissions	X	X
Loma Linda University	Loma Linda, CA	56 (tie)	2.6	Population Medicine	MPH	X				-	In person, online	https://publichealth.llu.edu/popmed	https://web.archive.org/web/20200830204756/https://publichealth.llu.edu/admissions	X	X
Loma Linda University	Loma Linda, CA	56 (tie)	2.6	Nutrition	MS	X				-	In person	https://publichealth.llu.edu/academics/master-science-ms	https://web.archive.org/web/20200830204756/https://publichealth.llu.edu/admissions	X	X
Loma Linda University	Loma Linda, CA	56 (tie)	2.6	Epidemiology	PhD				X		In person	https://publichealth.llu.edu/academics/doctor-philosophy-phd/phd-epidemiology		X		X		X
Loma Linda University	Loma Linda, CA	56 (tie)	2.6	Nutrition	PhD				X		In person	https://publichealth.llu.edu/academics/doctor-philosophy-phd/phd-nutrition		X		X
Pennsylvania State University	Hershey, PA	56 (tie)	2.6	Public Health	DrPH		X	Fall 2021		strongly recommended	In person	https://med.psu.edu/drph/details	https://web.archive.org/web/20200828163207/https://med.psu.edu/drph/apply	X		X
Pennsylvania State University	Hershey, PA	56 (tie)	2.6	Community and Behavioral Health	MPH	X				optional	In person	https://med.psu.edu/public-health-mph	https://web.archive.org/web/20200828163920/https://med.psu.edu/public-health-mph/apply	X	X						X
Pennsylvania State University	Hershey, PA	56 (tie)	2.6	Epidemiology and Biostatistics	MPH	X				recommended	In person	https://med.psu.edu/public-health-mph	https://web.archive.org/web/20200828163920/https://med.psu.edu/public-health-mph/apply	X	X		X	X
Pennsylvania State University	Hershey, PA	56 (tie)	2.6	Global Health	MPH	X				optional	In person	https://med.psu.edu/public-health-mph	https://web.archive.org/web/20200828163920/https://med.psu.edu/public-health-mph/apply	X	X
Pennsylvania State University	Hershey, PA	56 (tie)	2.6	Health Systems Organization and Policy	MPH	X				optional	In person	https://med.psu.edu/public-health-mph	https://web.archive.org/web/20200828163920/https://med.psu.edu/public-health-mph/apply	X	X					X
Pennsylvania State University	Hershey, PA	56 (tie)	2.6	Biostatistics	PhD				X		In person	https://med.psu.edu/biostatistics-phd		X		X	X
Pennsylvania State University	Hershey, PA	56 (tie)	2.6	Epidemiology	PhD				X		In person	https://med.psu.edu/epidemiology-phd		X		X		X
Pennsylvania State University	Hershey, PA	56 (tie)	2.6	Health Policy and Administration	PhD				X		In person	https://hhd.psu.edu/hpa/graduate/phd-health-policy-and-administration		X		X				X
University of Miami	Miami, FL	56 (tie)	2.6	Public Health	MPH	X				optional	In person	https://graduatestudies.publichealth.med.miami.edu/academic-programs/masters-degrees/mph-program-plan/index.html	https://web.archive.org/web/20200830205953/https://graduatestudies.publichealth.med.miami.edu/admissions/application-process/index.html	X	X
University of Miami	Miami, FL	56 (tie)	2.6	Biostatistics	MS	X				optional	In person	https://graduatestudies.publichealth.med.miami.edu/academic-programs/masters-degrees/ms-biostatistics-program-plan/index.html	https://web.archive.org/web/20200830205953/https://graduatestudies.publichealth.med.miami.edu/admissions/application-process/index.html	X	X		X
University of Miami	Miami, FL	56 (tie)	2.6	Climate and Health	MS	X				optional	In person	https://graduatestudies.publichealth.med.miami.edu/academic-programs/masters-degrees/ms-climate-and-health-program-plan/index.html	https://web.archive.org/web/20200830205953/https://graduatestudies.publichealth.med.miami.edu/admissions/application-process/index.html	X	X
University of Miami	Miami, FL	56 (tie)	2.6	Prevention Science and Community Health	MS	X				optional	In person	https://graduatestudies.publichealth.med.miami.edu/academic-programs/masters-degrees/ms-prevention-science-and-community-health/index.html	https://web.archive.org/web/20200830205953/https://graduatestudies.publichealth.med.miami.edu/admissions/application-process/index.html	X	X						X
University of Miami	Miami, FL	56 (tie)	2.6	Public Health	MSPH	X				optional	In person	https://graduatestudies.publichealth.med.miami.edu/academic-programs/masters-degrees/msph-program-plan/index.html	https://web.archive.org/web/20200830205953/https://graduatestudies.publichealth.med.miami.edu/admissions/application-process/index.html	X	X
University of Miami	Miami, FL	56 (tie)	2.6	Biostatistics	PhD				X		In person	https://graduatestudies.publichealth.med.miami.edu/academic-programs/doctoral-degrees/phd-biostatistics/index.html		X		X	X
University of Miami	Miami, FL	56 (tie)	2.6	Epidemiology	PhD				X		In person	https://graduatestudies.publichealth.med.miami.edu/academic-programs/doctoral-degrees/phd-epidemiology/index.html		X		X		X
University of Miami	Miami, FL	56 (tie)	2.6	Prevention Science and Community Health	PhD				X		In person	https://graduatestudies.publichealth.med.miami.edu/academic-programs/doctoral-degrees/phd-prevention-science-and-community-health/index.html		X		X					X
University of Nebraska Medical Center	Omaha, NE	56 (tie)	2.6	Epidemiology	DrPH	X				-	In person	https://www.unmc.edu/publichealth/programs/doctorofpublichealth/index.html	https://web.archive.org/web/20200830211133/https://www.unmc.edu/publichealth/admissions/doctorofpublichealth.html	X		X		X
University of Nebraska Medical Center	Omaha, NE	56 (tie)	2.6	Health Administration	MHA			Fall 2020		optional?	In person	https://www.unmc.edu/publichealth/programs/masterofhealthadmin/index.html	https://web.archive.org/web/20200607102838/https://www.unmc.edu/publichealth/admissions/mpa.html	X	X
University of Nebraska Medical Center	Omaha, NE	56 (tie)	2.6	Biostatistics	MPH			Spring 2021, Fall 2020		optional?	In person, online	https://www.unmc.edu/publichealth/programs/masterofpublichealth/index.html	https://web.archive.org/web/20200823211803/https://www.unmc.edu/publichealth/admissions/masterofpublichealth/index.html , https://web.archive.org/web/20200607100258/https://www.unmc.edu/publichealth/admissions/masterofpublichealth/index.html	X	X		X
University of Nebraska Medical Center	Omaha, NE	56 (tie)	2.6	Emergency Preparedness	MPH			Spring 2021, Fall 2020		optional?	In person, online	https://www.unmc.edu/publichealth/programs/masterofpublichealth/index.html	https://web.archive.org/web/20200823211803/https://www.unmc.edu/publichealth/admissions/masterofpublichealth/index.html , https://web.archive.org/web/20200607100258/https://www.unmc.edu/publichealth/admissions/masterofpublichealth/index.html	X	X
University of Nebraska Medical Center	Omaha, NE	56 (tie)	2.6	Environmental and Occupational Health	MPH			Spring 2021, Fall 2020		optional?	In person, online	https://www.unmc.edu/publichealth/programs/masterofpublichealth/index.html	https://web.archive.org/web/20200823211803/https://www.unmc.edu/publichealth/admissions/masterofpublichealth/index.html , https://web.archive.org/web/20200607100258/https://www.unmc.edu/publichealth/admissions/masterofpublichealth/index.html	X	X				X
University of Nebraska Medical Center	Omaha, NE	56 (tie)	2.6	Epidemiology	MPH			Spring 2021, Fall 2020		optional?	In person, online	https://www.unmc.edu/publichealth/programs/masterofpublichealth/index.html	https://web.archive.org/web/20200823211803/https://www.unmc.edu/publichealth/admissions/masterofpublichealth/index.html , https://web.archive.org/web/20200607100258/https://www.unmc.edu/publichealth/admissions/masterofpublichealth/index.html	X	X			X
University of Nebraska Medical Center	Omaha, NE	56 (tie)	2.6	Health Promotion	MPH			Spring 2021, Fall 2020		optional?	In person, online	https://www.unmc.edu/publichealth/programs/masterofpublichealth/index.html	https://web.archive.org/web/20200823211803/https://www.unmc.edu/publichealth/admissions/masterofpublichealth/index.html , https://web.archive.org/web/20200607100258/https://www.unmc.edu/publichealth/admissions/masterofpublichealth/index.html	X	X						X
University of Nebraska Medical Center	Omaha, NE	56 (tie)	2.6	Maternal and Child Health	MPH			Spring 2021, Fall 2020		optional?	In person, online	https://www.unmc.edu/publichealth/programs/masterofpublichealth/index.html	https://web.archive.org/web/20200823211803/https://www.unmc.edu/publichealth/admissions/masterofpublichealth/index.html , https://web.archive.org/web/20200607100258/https://www.unmc.edu/publichealth/admissions/masterofpublichealth/index.html	X	X
University of Nebraska Medical Center	Omaha, NE	56 (tie)	2.6	Public Health Administration and Policy	MPH			Spring 2021, Fall 2020		optional?	In person, online	https://www.unmc.edu/publichealth/programs/masterofpublichealth/index.html	https://web.archive.org/web/20200823211803/https://www.unmc.edu/publichealth/admissions/masterofpublichealth/index.html , https://web.archive.org/web/20200607100258/https://www.unmc.edu/publichealth/admissions/masterofpublichealth/index.html	X	X					X
University of Nebraska Medical Center	Omaha, NE	56 (tie)	2.6	Emergency Preparedness	MS	X				-	In person	https://www.unmc.edu/publichealth/programs/ms-prep/index.html	https://web.archive.org/web/20200607231037/https://www.unmc.edu/publichealth/admissions/emergencypreparedness.html	X	X
University of Nebraska Medical Center	Omaha, NE	56 (tie)	2.6	Biostatistics	PhD				X		In person	https://www.unmc.edu/publichealth/programs/phdprograms/phdbiostatistics.html		X		X	X
University of Nebraska Medical Center	Omaha, NE	56 (tie)	2.6	Environmental Health, Occupational Health, and Toxicology	PhD				X		In person	https://www.unmc.edu/publichealth/programs/phdprograms/phdenviromental.html		X		X			X
University of Nebraska Medical Center	Omaha, NE	56 (tie)	2.6	Epidemiology	PhD				X		In person	https://www.unmc.edu/publichealth/programs/phdprograms/phdepidemiology.html		X		X		X
University of Nebraska Medical Center	Omaha, NE	56 (tie)	2.6	Health Promotion and Disease Prevention Research	PhD	X				-	In person	https://www.unmc.edu/publichealth/programs/phdprograms/phdhealthpromotion.html	https://archive.vn/XOUit	X		X					X
University of Nebraska Medical Center	Omaha, NE	56 (tie)	2.6	Health Services and Policy Research	PhD				X		In person	https://www.unmc.edu/publichealth/programs/phdprograms/phdhealthservices.html		X		X				X
University of Rochester	Rochester, NY	56 (tie)	2.6	Public Health	MPH	X				-	Hybrid, online	https://www.urmc.rochester.edu/education/graduate/masters-degrees/public-health.aspx	https://web.archive.org/web/20200830211858/https://www.urmc.rochester.edu/education/graduate/masters-degrees/public-health/admissions.aspx	X	X
University of Rochester	Rochester, NY	56 (tie)	2.6	Biostatistics	MS				X		In person	https://www.urmc.rochester.edu/education/graduate/phd/statistics/ms-in-biostatistics.aspx		X	X		X
University of Rochester	Rochester, NY	56 (tie)	2.6	Clinical Investigation	MS	X				-	In person	https://www.urmc.rochester.edu/education/graduate/masters-degrees/clinical-investigation.aspx	https://web.archive.org/web/20200830212214/https://www.urmc.rochester.edu/education/graduate/masters-degrees/clinical-investigation/apply.aspx	X	X
University of Rochester	Rochester, NY	56 (tie)	2.6	Epidemiology	MS	X				-	In person	https://www.urmc.rochester.edu/education/graduate/masters-degrees/epidemiology.aspx	https://web.archive.org/web/20200830212356/https://www.urmc.rochester.edu/education/graduate/masters-degrees/epidemiology/admissions.aspx	X	X			X
University of Rochester	Rochester, NY	56 (tie)	2.6	Health Services Research and Policy	MS	X				-	In person	https://www.urmc.rochester.edu/education/graduate/masters-degrees/health-services-research-policy.aspx	https://web.archive.org/web/20200830212438/https://www.urmc.rochester.edu/education/graduate/masters-degrees/health-services-research-policy/admissions.aspx	X	X					X
University of Rochester	Rochester, NY	56 (tie)	2.6	Epidemiology	PhD				X		In person	https://www.urmc.rochester.edu/education/graduate/phd/epidemiology.aspx		X		X		X
University of Rochester	Rochester, NY	56 (tie)	2.6	Toxicology	PhD	X				optional	In person	https://www.urmc.rochester.edu/education/graduate/phd/toxicology/apply.aspx	https://web.archive.org/web/20200830212615/https://www.urmc.rochester.edu/education/graduate/phd/toxicology/apply.aspx	X		X			X
Baylor University	Waco, TX	62 (tie)	2.5	Community Health	MPH	X				-	Online	https://onlinegrad.baylor.edu/mph/	https://web.archive.org/web/20200831032755/https://onlinegrad.baylor.edu/mph/	X	X						X
Baylor University	Waco, TX	62 (tie)	2.5	Community Health	MPH				X		In person	https://www.baylor.edu/publichealth/index.php?id=965032		X	X						X
Baylor University	Waco, TX	62 (tie)	2.5	Environmental Health Science	MPH				X		In person	https://www.baylor.edu/publichealth/index.php?id=965033		X	X				X
Baylor University	Waco, TX	62 (tie)	2.5	Epidemiology	MPH				X		In person	https://www.baylor.edu/publichealth/index.php?id=965034		X	X			X
Case Western Reserve University	Cleveland, OH	62 (tie)	2.5	Global Health	MPH				X		In person	https://case.edu/medicine/pqhs/education/public-health/master-public-health/mph-curriculum/concentrations		X	X
Case Western Reserve University	Cleveland, OH	62 (tie)	2.5	Health Informatics	MPH				X		In person	https://case.edu/medicine/pqhs/education/public-health/master-public-health/mph-curriculum/concentrations		X	X
Case Western Reserve University	Cleveland, OH	62 (tie)	2.5	Health Policy and Management	MPH				X		In person	https://case.edu/medicine/pqhs/education/public-health/master-public-health/mph-curriculum/concentrations		X	X					X
Case Western Reserve University	Cleveland, OH	62 (tie)	2.5	Health Promotion and Disease Prevention	MPH				X		In person	https://case.edu/medicine/pqhs/education/public-health/master-public-health/mph-curriculum/concentrations		X	X						X
Case Western Reserve University	Cleveland, OH	62 (tie)	2.5	Population Health Research	MPH				X		In person	https://case.edu/medicine/pqhs/education/public-health/master-public-health/mph-curriculum/concentrations		X	X
Case Western Reserve University	Cleveland, OH	62 (tie)	2.5	Biomedical and Health Informatics	MS				X		In person	https://case.edu/medicine/pqhs/education/biomedical-health-informatics/ms-biomedical-health-informatics		X	X
Case Western Reserve University	Cleveland, OH	62 (tie)	2.5	Biostatistics	MS				X		In person	https://case.edu/medicine/pqhs/education/biostatistics-and-epidemiology/ms-biostatistics		X	X		X
Case Western Reserve University	Cleveland, OH	62 (tie)	2.5	Clinical Research	MS				X		In person	https://case.edu/medicine/pqhs/education/clinical-research/ms-clinical-research-crsp		X	X
Case Western Reserve University	Cleveland, OH	62 (tie)	2.5	Biomedical and Health Informatics	PhD				X		In person	https://case.edu/medicine/pqhs/education/biomedical-health-informatics/phd-biomedical-health-informatics		X		X
Case Western Reserve University	Cleveland, OH	62 (tie)	2.5	Clinical Translational Science	PhD				X		In person	https://case.edu/medicine/pqhs/education/clinical-research/phd-clinical-translational-science-cts		X		X
Case Western Reserve University	Cleveland, OH	62 (tie)	2.5	Epidemiology and Biostatistics	PhD				X		In person	https://case.edu/medicine/pqhs/education/biostatistics-and-epidemiology/phd-epidemiology-and-biostatistics		X		X	X	X
Indiana University-Purdue University--Indianapolis	Indianapolis, IN	62 (tie)	2.5	Global Health Leadership	DrPH	X				-	In person	https://fsph.iupui.edu/academics/doctoral/public-health/index.html	https://archive.vn/D1rcv	X		X
Indiana University-Purdue University--Indianapolis	Indianapolis, IN	62 (tie)	2.5	Health Administration	MHA				X		In person	https://fsph.iupui.edu/academics/masters/mha/index.html		X	X
Indiana University-Purdue University--Indianapolis	Indianapolis, IN	62 (tie)	2.5	Biostatistics	MPH				X		In person	https://fsph.iupui.edu/academics/masters/mph/biostatistics/index.html		X	X		X
Indiana University-Purdue University--Indianapolis	Indianapolis, IN	62 (tie)	2.5	Environmental Health Science	MPH				X		In person	https://fsph.iupui.edu/academics/masters/mph/environmental-health/index.html		X	X				X
Indiana University-Purdue University--Indianapolis	Indianapolis, IN	62 (tie)	2.5	Epidemiology	MPH				X		In person	https://fsph.iupui.edu/academics/masters/mph/epidemiology/index.html		X	X			X
Indiana University-Purdue University--Indianapolis	Indianapolis, IN	62 (tie)	2.5	Health Policy and Management	MPH				X		In person	https://fsph.iupui.edu/academics/masters/mph/health-policy-management/index.html		X	X					X
Indiana University-Purdue University--Indianapolis	Indianapolis, IN	62 (tie)	2.5	Public Health Informatics	MPH				X		In person	https://fsph.iupui.edu/academics/masters/mph/informatics/index.html		X	X
Indiana University-Purdue University--Indianapolis	Indianapolis, IN	62 (tie)	2.5	Social and Behavioral Sciences	MPH				X		In person	https://fsph.iupui.edu/academics/masters/mph/social-behavioral-sciences/index.html		X	X						X
Indiana University-Purdue University--Indianapolis	Indianapolis, IN	62 (tie)	2.5	Biostatistics	MS				X		In person	https://fsph.iupui.edu/academics/masters/ms-biostatistics/index.html		X	X		X
Indiana University-Purdue University--Indianapolis	Indianapolis, IN	62 (tie)	2.5	Global Health and Sustainable Development	MS	X				-	In person	https://fsph.iupui.edu/academics/masters/ms-global-health-sustainable-development/index.html	https://web.archive.org/web/20200831034337/https://fsph.iupui.edu/admissions/apply/ms-ghsd.html	X	X
Indiana University-Purdue University--Indianapolis	Indianapolis, IN	62 (tie)	2.5	Product Stewardship	MS	X				-	In person	https://fsph.iupui.edu/academics/masters/msps/index.html	https://web.archive.org/web/20200831034542/https://fsph.iupui.edu/admissions/apply/msps-applicants.html	X	X
Indiana University-Purdue University--Indianapolis	Indianapolis, IN	62 (tie)	2.5	Biostatistics	PhD				X		In person	https://fsph.iupui.edu/academics/doctoral/biostatistics/index.html		X		X	X
Indiana University-Purdue University--Indianapolis	Indianapolis, IN	62 (tie)	2.5	Epidemiology	PhD				X		In person	https://fsph.iupui.edu/academics/doctoral/epidemiology/index.html		X		X		X
Indiana University-Purdue University--Indianapolis	Indianapolis, IN	62 (tie)	2.5	Health Policy and Management	PhD	X				strongly recommended	In person	https://fsph.iupui.edu/academics/doctoral/health-policy-management/index.html	https://web.archive.org/web/20200831034743/https://fsph.iupui.edu/admissions/apply/phd-hpm.html	X		X				X
Louisiana State University Health Sciences Center--New Orleans	New Orleans, LA	62 (tie)	2.5	Behavioral and Community Health Sciences	MPH	X				-	In person	https://sph.lsuhsc.edu/education/academic-programs/behavioral-community-health-sciences-bchs/mph-degree/	https://web.archive.org/web/20200827184809/https://twitter.com/LSUPublicHealth/status/1299055873973682176	X	X						X
Louisiana State University Health Sciences Center--New Orleans	New Orleans, LA	62 (tie)	2.5	Biostatistics	MPH	X				-	In person	https://sph.lsuhsc.edu/education/academic-programs/biostatistics-bios/mph-degree/	https://web.archive.org/web/20200827184809/https://twitter.com/LSUPublicHealth/status/1299055873973682176	X	X		X
Louisiana State University Health Sciences Center--New Orleans	New Orleans, LA	62 (tie)	2.5	Environmental and Occupational Health Sciences	MPH	X				-	In person	https://sph.lsuhsc.edu/education/academic-programs/environmental-occupational-health-sciences-enhs/curriculum/	https://web.archive.org/web/20200827184809/https://twitter.com/LSUPublicHealth/status/1299055873973682176	X	X				X
Louisiana State University Health Sciences Center--New Orleans	New Orleans, LA	62 (tie)	2.5	Epidemiology	MPH	X				-	In person	https://sph.lsuhsc.edu/education/academic-programs/epidemiology-epid/mph-degree/	https://web.archive.org/web/20200827184809/https://twitter.com/LSUPublicHealth/status/1299055873973682176	X	X			X
Louisiana State University Health Sciences Center--New Orleans	New Orleans, LA	62 (tie)	2.5	Health Policy and Systems Management	MPH	X				-	In person	https://sph.lsuhsc.edu/education/academic-programs/health-policy-systems-management-hpsm/curriculum/	https://web.archive.org/web/20200827184809/https://twitter.com/LSUPublicHealth/status/1299055873973682176	X	X					X
Louisiana State University Health Sciences Center--New Orleans	New Orleans, LA	62 (tie)	2.5	Biostatistics	MS	X				-	In person	https://sph.lsuhsc.edu/education/academic-programs/biostatistics-bios/ms-degree/	https://web.archive.org/web/20200920145311/https://sph.lsuhsc.edu/admissions/applying/application-requirements/ , https://web.archive.org/web/20200903195752/https://sph.lsuhsc.edu/admissions/applying/application-requirements/ , https://web.archive.org/web/20200828045754/https://sph.lsuhsc.edu/admissions/applying/application-requirements/	X	X		X
Louisiana State University Health Sciences Center--New Orleans	New Orleans, LA	62 (tie)	2.5	Biostatistics	PhD			Fall 2020, Summer 2020		optional?	In person	https://sph.lsuhsc.edu/education/academic-programs/biostatistics-bios/phd-degree/	https://web.archive.org/web/20200828045754/https://sph.lsuhsc.edu/admissions/applying/application-requirements/	X		X	X
Louisiana State University Health Sciences Center--New Orleans	New Orleans, LA	62 (tie)	2.5	Community Health Sciences	PhD			Fall 2020, Summer 2020		optional?	In person	https://sph.lsuhsc.edu/education/academic-programs/behavioral-community-health-sciences-bchs/phd-degree/	https://web.archive.org/web/20200828045754/https://sph.lsuhsc.edu/admissions/applying/application-requirements/	X		X					X
Louisiana State University Health Sciences Center--New Orleans	New Orleans, LA	62 (tie)	2.5	Epidemiology	PhD			Fall 2020, Summer 2020		optional?	In person	https://sph.lsuhsc.edu/education/academic-programs/epidemiology-epid/phd-program/	https://web.archive.org/web/20200828045754/https://sph.lsuhsc.edu/admissions/applying/application-requirements/	X		X		X
Thomas Jefferson University	Philadelphia, PA	62 (tie)	2.5	Population Health	DHS				X		Hybrid	https://www.jefferson.edu/academics/colleges-schools-institutes/population-health/degrees-programs/degrees-graduate-certificates/dhsc-in-population-health.html		X		X
Thomas Jefferson University	Philadelphia, PA	62 (tie)	2.5	Healthcare Quality and Safety	MPH			Spring 2021, Fall 2020		optional?	In person	https://www.jefferson.edu/academics/colleges-schools-institutes/population-health/degrees-programs/degrees-graduate-certificates/public-health.html	https://web.archive.org/web/20200601191322/https://www.jefferson.edu/academics/colleges-schools-institutes/population-health/degrees-programs/degrees-graduate-certificates/public-health/applying.html	X	X
Thomas Jefferson University	Philadelphia, PA	62 (tie)	2.5	Public Health Analytics	MPH			Spring 2021, Fall 2020		optional?	In person	https://www.jefferson.edu/academics/colleges-schools-institutes/population-health/degrees-programs/degrees-graduate-certificates/public-health.html	https://web.archive.org/web/20200601191322/https://www.jefferson.edu/academics/colleges-schools-institutes/population-health/degrees-programs/degrees-graduate-certificates/public-health/applying.html	X	X
Thomas Jefferson University	Philadelphia, PA	62 (tie)	2.5	Public Health Policy and Advocacy	MPH			Spring 2021, Fall 2020		optional?	In person	https://www.jefferson.edu/academics/colleges-schools-institutes/population-health/degrees-programs/degrees-graduate-certificates/public-health.html	https://web.archive.org/web/20200601191322/https://www.jefferson.edu/academics/colleges-schools-institutes/population-health/degrees-programs/degrees-graduate-certificates/public-health/applying.html	X	X					X
Thomas Jefferson University	Philadelphia, PA	62 (tie)	2.5	Public Health Practice	MPH			Spring 2021, Fall 2020		optional?	In person	https://www.jefferson.edu/academics/colleges-schools-institutes/population-health/degrees-programs/degrees-graduate-certificates/public-health.html	https://web.archive.org/web/20200601191322/https://www.jefferson.edu/academics/colleges-schools-institutes/population-health/degrees-programs/degrees-graduate-certificates/public-health/applying.html	X	X
Thomas Jefferson University	Philadelphia, PA	62 (tie)	2.5	Applied Health Economics and Outcomes Research	MS			Spring 2021, Fall 2020		optional?	Online	https://www.jefferson.edu/academics/colleges-schools-institutes/population-health/degrees-programs/degrees-graduate-certificates/applied-health-economics.html	https://web.archive.org/web/20200601191322/https://www.jefferson.edu/academics/colleges-schools-institutes/population-health/degrees-programs/degrees-graduate-certificates/public-health/applying.html	X	X
Thomas Jefferson University	Philadelphia, PA	62 (tie)	2.5	Health Policy	MS			Spring 2021, Fall 2020		optional?	Online	https://www.jefferson.edu/academics/colleges-schools-institutes/population-health/degrees-programs/degrees-graduate-certificates/health-policy.html	https://web.archive.org/web/20200601191322/https://www.jefferson.edu/academics/colleges-schools-institutes/population-health/degrees-programs/degrees-graduate-certificates/public-health/applying.html	X	X					X
Thomas Jefferson University	Philadelphia, PA	62 (tie)	2.5	Healthcare Quality and Safety	MS			Spring 2021, Fall 2020		optional?	Online	https://www.jefferson.edu/academics/colleges-schools-institutes/population-health/degrees-programs/degrees-graduate-certificates/healthcare-quality-safety.html	https://web.archive.org/web/20200601191322/https://www.jefferson.edu/academics/colleges-schools-institutes/population-health/degrees-programs/degrees-graduate-certificates/public-health/applying.html	X	X
Thomas Jefferson University	Philadelphia, PA	62 (tie)	2.5	Operational Excellence	MS			Spring 2021, Fall 2020		optional?	Online	https://www.jefferson.edu/academics/colleges-schools-institutes/population-health/degrees-programs/degrees-graduate-certificates/operational-excellence.html	https://web.archive.org/web/20200601191322/https://www.jefferson.edu/academics/colleges-schools-institutes/population-health/degrees-programs/degrees-graduate-certificates/public-health/applying.html	X	X
Thomas Jefferson University	Philadelphia, PA	62 (tie)	2.5	Population Health	MS			Spring 2021, Fall 2020		optional?	Online	https://www.jefferson.edu/academics/colleges-schools-institutes/population-health/degrees-programs/degrees-graduate-certificates/population-health.html	https://web.archive.org/web/20200601191322/https://www.jefferson.edu/academics/colleges-schools-institutes/population-health/degrees-programs/degrees-graduate-certificates/public-health/applying.html	X	X
Thomas Jefferson University	Philadelphia, PA	62 (tie)	2.5	Population Health Intelligence	MS			Spring 2021, Fall 2020		optional?	Online	https://www.jefferson.edu/academics/colleges-schools-institutes/population-health/degrees-programs/degrees-graduate-certificates/population-health-intelligence.html	https://web.archive.org/web/20200601191322/https://www.jefferson.edu/academics/colleges-schools-institutes/population-health/degrees-programs/degrees-graduate-certificates/public-health/applying.html	X	X
Thomas Jefferson University	Philadelphia, PA	62 (tie)	2.5	Population Health Science	PhD				X		In person	https://www.jefferson.edu/academics/colleges-schools-institutes/population-health/degrees-programs/degrees-graduate-certificates/population-health-science-phd.html		X		X
University of Maryland--Baltimore	Baltimore, MD	62 (tie)	2.5	Community and Population Health	MPH				X		In person	https://www.medschool.umaryland.edu/epidemiology/mph/Prospective-Students/Concentrations/		X	X						X
University of Maryland--Baltimore	Baltimore, MD	62 (tie)	2.5	Epidemiology	MPH				X		In person	https://www.medschool.umaryland.edu/epidemiology/mph/Prospective-Students/Concentrations/		X	X			X
University of Maryland--Baltimore	Baltimore, MD	62 (tie)	2.5	Global Health	MPH				X		In person	https://www.medschool.umaryland.edu/epidemiology/mph/Prospective-Students/Concentrations/		X	X
University of Maryland--Baltimore	Baltimore, MD	62 (tie)	2.5	Epidemiology and Clinical Research	MS				X		In person	https://lifesciences.umaryland.edu/epidemiology/Masters-Program/MS-in-Epidemiology-and-Clinical-Research-Epidemiology-Track/		X	X			X
University of Maryland--Baltimore	Baltimore, MD	62 (tie)	2.5	Human Genetics and Genomic Medicine	MS				X		In person	https://lifesciences.umaryland.edu/epidemiology/Masters-Program/MS-in-Human-Genetics-and-Genomic-Medicine/		X	X
University of Maryland--Baltimore	Baltimore, MD	62 (tie)	2.5	Epidemiology and Human Genetics	PhD				X		In person	https://lifesciences.umaryland.edu/epidemiology/Program-Tracks/Epidemiology-Track/		X		X		X
University of Oklahoma	Oklahoma City, OK	62 (tie)	2.5	Health Administration	MHA		X	Fall 2021, Fall 2020		optional	In person	https://publichealth.ouhsc.edu/About-Us/Departments/Health-Administration-Policy/Programs/Master-Health-Administration	https://web.archive.org/web/20200823223054/https://publichealth.ouhsc.edu/Prospective-Students/How-To-Apply	X	X
University of Oklahoma	Oklahoma City, OK	62 (tie)	2.5	Biostatistics	MPH		X	Fall 2021, Fall 2020		optional	In person	https://publichealth.ouhsc.edu/About-Us/All-Programs	https://web.archive.org/web/20200823223054/https://publichealth.ouhsc.edu/Prospective-Students/How-To-Apply	X	X		X
University of Oklahoma	Oklahoma City, OK	62 (tie)	2.5	Environmental Health	MPH		X	Fall 2021, Fall 2020		optional	In person	https://publichealth.ouhsc.edu/About-Us/All-Programs	https://web.archive.org/web/20200823223054/https://publichealth.ouhsc.edu/Prospective-Students/How-To-Apply	X	X				X
University of Oklahoma	Oklahoma City, OK	62 (tie)	2.5	Epidemiology	MPH		X	Fall 2021, Fall 2020		optional	In person	https://publichealth.ouhsc.edu/About-Us/All-Programs	https://web.archive.org/web/20200823223054/https://publichealth.ouhsc.edu/Prospective-Students/How-To-Apply	X	X			X
University of Oklahoma	Oklahoma City, OK	62 (tie)	2.5	Health Administration and Policy	MPH		X	Fall 2021, Fall 2020		optional	In person	https://publichealth.ouhsc.edu/About-Us/All-Programs	https://web.archive.org/web/20200823223054/https://publichealth.ouhsc.edu/Prospective-Students/How-To-Apply	X	X					X
University of Oklahoma	Oklahoma City, OK	62 (tie)	2.5	Health Promotion Science	MPH		X	Fall 2021, Fall 2020		optional	In person	https://publichealth.ouhsc.edu/About-Us/All-Programs	https://web.archive.org/web/20200823223054/https://publichealth.ouhsc.edu/Prospective-Students/How-To-Apply	X	X						X
University of Oklahoma	Oklahoma City, OK	62 (tie)	2.5	Interdisciplinary Public Health	MPH		X	Fall 2021, Fall 2020		optional	In person	https://publichealth.ouhsc.edu/About-Us/All-Programs	https://web.archive.org/web/20200823223054/https://publichealth.ouhsc.edu/Prospective-Students/How-To-Apply	X	X
University of Oklahoma	Oklahoma City, OK	62 (tie)	2.5	Biostatistics	MS		X	Fall 2021, Fall 2020		optional	In person	https://publichealth.ouhsc.edu/About-Us/All-Programs/Master-of-Science	https://web.archive.org/web/20200823223054/https://publichealth.ouhsc.edu/Prospective-Students/How-To-Apply	X	X		X
University of Oklahoma	Oklahoma City, OK	62 (tie)	2.5	Epidemiology	MS		X	Fall 2021, Fall 2020		optional	In person	https://publichealth.ouhsc.edu/About-Us/All-Programs/Master-of-Science	https://web.archive.org/web/20200823223054/https://publichealth.ouhsc.edu/Prospective-Students/How-To-Apply	X	X			X
University of Oklahoma	Oklahoma City, OK	62 (tie)	2.5	Health Promotion Sciences	MS		X	Fall 2021, Fall 2020		optional	In person	https://publichealth.ouhsc.edu/About-Us/All-Programs/Master-of-Science	https://web.archive.org/web/20200823223054/https://publichealth.ouhsc.edu/Prospective-Students/How-To-Apply	X	X						X
University of Oklahoma	Oklahoma City, OK	62 (tie)	2.5	Industrial Hygiene and Environmental Health Sciences	MS		X	Fall 2021, Fall 2020		optional	In person	https://publichealth.ouhsc.edu/About-Us/All-Programs/Master-of-Science	https://web.archive.org/web/20200823223054/https://publichealth.ouhsc.edu/Prospective-Students/How-To-Apply	X	X				X
University of Oklahoma	Oklahoma City, OK	62 (tie)	2.5	Biostatistics	PhD		X	Fall 2021, Fall 2020		optional	In person	https://publichealth.ouhsc.edu/About-Us/All-Programs/Doctor-of-Philosophy	https://web.archive.org/web/20200823223054/https://publichealth.ouhsc.edu/Prospective-Students/How-To-Apply	X		X	X
University of Oklahoma	Oklahoma City, OK	62 (tie)	2.5	Epidemiology	PhD		X	Fall 2021, Fall 2020		optional	In person	https://publichealth.ouhsc.edu/About-Us/All-Programs/Doctor-of-Philosophy	https://web.archive.org/web/20200823223054/https://publichealth.ouhsc.edu/Prospective-Students/How-To-Apply	X		X		X
University of Oklahoma	Oklahoma City, OK	62 (tie)	2.5	Health Promotion Sciences	PhD		X	Fall 2021, Fall 2020		optional	In person	https://publichealth.ouhsc.edu/About-Us/All-Programs/Doctor-of-Philosophy	https://web.archive.org/web/20200823223054/https://publichealth.ouhsc.edu/Prospective-Students/How-To-Apply	X		X					X
University of Oklahoma	Oklahoma City, OK	62 (tie)	2.5	Occupational and Environmental Health	PhD		X	Fall 2021, Fall 2020		optional	In person	https://publichealth.ouhsc.edu/About-Us/All-Programs/Doctor-of-Philosophy	https://web.archive.org/web/20200823223054/https://publichealth.ouhsc.edu/Prospective-Students/How-To-Apply	X		X			X
University of San Francisco	San Francisco, CA	62 (tie)	2.5	Behavioral Health	MPH	X				-	In person	https://www.usfca.edu/nursing/programs/masters/public-health/concentrations/behavioral-health	https://web.archive.org/web/20200831042844/https://www.usfca.edu/nursing/programs/graduate/masters/public-health/admission	X	X						X
University of San Francisco	San Francisco, CA	62 (tie)	2.5	Community and Public Health Practice	MPH	X				-	In person, online	https://www.usfca.edu/nursing/programs/masters/public-health/concentrations/community-public-health-practice	https://web.archive.org/web/20200831042844/https://www.usfca.edu/nursing/programs/graduate/masters/public-health/admission	X	X						X
University of San Francisco	San Francisco, CA	62 (tie)	2.5	Health Policy Leadership	MPH	X				-	In person	https://www.usfca.edu/nursing/programs/masters/public-health/concentrations/health-policy-leadership	https://web.archive.org/web/20200831042844/https://www.usfca.edu/nursing/programs/graduate/masters/public-health/admission	X	X					X
University of San Francisco	San Francisco, CA	62 (tie)	2.5	Health Informatics	MSHI	X				strongly recommended	In person	https://www.usfca.edu/nursing/programs/graduate/masters/health-informatics	https://web.archive.org/web/20200831043029/https://www.usfca.edu/nursing/programs/graduate/masters/health-informatics/admission	X	X
University of Virginia	Charlottesville, VA	62 (tie)	2.5	Health Law, Policy, and Ethics	MPH				X		In person	https://med.virginia.edu/phs/education-programs-in-public-health-sciences/the-master-of-public-health-program-at-the-university-of-virginia/mph-core-courses/		X	X					X
University of Virginia	Charlottesville, VA	62 (tie)	2.5	Research in Practice	MPH				X		In person	https://med.virginia.edu/phs/education-programs-in-public-health-sciences/the-master-of-public-health-program-at-the-university-of-virginia/mph-core-courses/		X	X
University of Virginia	Charlottesville, VA	62 (tie)	2.5	Clinical Research	MS				X		In person	https://med.virginia.edu/phs/education-programs-in-public-health-sciences/masters-in-clinical-research-university-of-virginia/		X	X
Georgia Southern University	Statesboro, GA	71 (tie)	2.4	Biostatistics	DrPH				X		In person	https://jphcoph.georgiasouthern.edu/degrees/#DrPHDegree		X		X	X
Georgia Southern University	Statesboro, GA	71 (tie)	2.4	Community Health Behavior and Education	DrPH				X		In person	https://jphcoph.georgiasouthern.edu/degrees/#DrPHDegree		X		X					X
Georgia Southern University	Statesboro, GA	71 (tie)	2.4	Epidemiology	DrPH				X		In person	https://jphcoph.georgiasouthern.edu/degrees/#DrPHDegree		X		X		X
Georgia Southern University	Statesboro, GA	71 (tie)	2.4	Health Policy and Management	DrPH				X		In person	https://jphcoph.georgiasouthern.edu/degrees/#DrPHDegree		X		X				X
Georgia Southern University	Statesboro, GA	71 (tie)	2.4	Public Health Leadership	DrPH				X		Online	https://jphcoph.georgiasouthern.edu/degrees/#DrPHDegree		X		X
Georgia Southern University	Statesboro, GA	71 (tie)	2.4	Applied Public Health	MPH	X				-	Online	https://jphcoph.georgiasouthern.edu/degrees/mph-online/	https://web.archive.org/web/20200830203215/https://jphcoph.georgiasouthern.edu/degrees/mph-admissions/	X	X
Georgia Southern University	Statesboro, GA	71 (tie)	2.4	Biostatistics	MPH				X		In person	https://jphcoph.georgiasouthern.edu/degrees/#MPHDegree		X	X		X
Georgia Southern University	Statesboro, GA	71 (tie)	2.4	Community Health	MPH				X		In person	https://jphcoph.georgiasouthern.edu/degrees/#MPHDegree		X	X						X
Georgia Southern University	Statesboro, GA	71 (tie)	2.4	Environmental Health Sciences	MPH	X				-	In person	https://jphcoph.georgiasouthern.edu/degrees/	https://web.archive.org/web/20200830203215/https://jphcoph.georgiasouthern.edu/degrees/mph-admissions/	X	X				X
Georgia Southern University	Statesboro, GA	71 (tie)	2.4	Epidemiology	MPH				X		In person	https://jphcoph.georgiasouthern.edu/degrees/#MPHDegree		X	X			X
Georgia Southern University	Statesboro, GA	71 (tie)	2.4	Health Policy and Management	MPH				X		In person	https://jphcoph.georgiasouthern.edu/degrees/#MPHDegree		X	X					X
Morehouse School of Medicine	Atlanta, GA	71 (tie)	2.4	Public Health	MPH			Fall 2020		optional?	In person	https://www.msm.edu/Education/MPH/ProgramOverview.php	https://archive.vn/anmtf	X	X
Mount Sinai Icahn School of Medicine	New York, NY	71 (tie)	2.4	Health Administration	MHA	X				optional	In person	https://icahn.mssm.edu/education/masters/healthcare-administration	https://web.archive.org/web/20200831044954/https://icahn.mssm.edu/education/admissions/graduate-education/ms-healthcare-administration	X	X
Mount Sinai Icahn School of Medicine	New York, NY	71 (tie)	2.4	Biostatistics	MPH	X				optional	In person	https://icahn.mssm.edu/education/masters/public-health/tracks/biostatistics	https://web.archive.org/web/20200831045652/https://icahn.mssm.edu/education/admissions/graduate-education/master-public-health	X	X		X
Mount Sinai Icahn School of Medicine	New York, NY	71 (tie)	2.4	Environmental Health Sciences	MPH	X				optional	In person	http://icahn.mssm.edu/education/masters/public-health/tracks/occupational-environmental	https://web.archive.org/web/20200831045652/https://icahn.mssm.edu/education/admissions/graduate-education/master-public-health	X	X				X
Mount Sinai Icahn School of Medicine	New York, NY	71 (tie)	2.4	Epidemiology	MPH	X				optional	In person	https://icahn.mssm.edu/education/masters/public-health/tracks/epidemiology	https://web.archive.org/web/20200831045652/https://icahn.mssm.edu/education/admissions/graduate-education/master-public-health	X	X			X
Mount Sinai Icahn School of Medicine	New York, NY	71 (tie)	2.4	General Public Health	MPH	X				optional	In person	https://icahn.mssm.edu/education/masters/public-health/tracks/general	https://web.archive.org/web/20200831045652/https://icahn.mssm.edu/education/admissions/graduate-education/master-public-health	X	X
Mount Sinai Icahn School of Medicine	New York, NY	71 (tie)	2.4	Global Health	MPH	X				optional	In person	https://icahn.mssm.edu/education/masters/public-health/tracks/global	https://web.archive.org/web/20200831045652/https://icahn.mssm.edu/education/admissions/graduate-education/master-public-health	X	X
Mount Sinai Icahn School of Medicine	New York, NY	71 (tie)	2.4	Health Care Management	MPH	X				optional	In person	https://icahn.mssm.edu/education/masters/public-health/tracks/healthcare-management	https://web.archive.org/web/20200831045652/https://icahn.mssm.edu/education/admissions/graduate-education/master-public-health	X	X					X
Mount Sinai Icahn School of Medicine	New York, NY	71 (tie)	2.4	Health Promotion and Disease Prevention	MPH	X				optional	In person	https://icahn.mssm.edu/education/masters/public-health/tracks/promotion-prevention	https://web.archive.org/web/20200831045652/https://icahn.mssm.edu/education/admissions/graduate-education/master-public-health	X	X						X
Mount Sinai Icahn School of Medicine	New York, NY	71 (tie)	2.4	Outcomes Research	MPH	X				optional	In person	https://icahn.mssm.edu/education/masters/public-health/tracks/outcomes-research	https://web.archive.org/web/20200831045652/https://icahn.mssm.edu/education/admissions/graduate-education/master-public-health	X	X
Mount Sinai Icahn School of Medicine	New York, NY	71 (tie)	2.4	Biostatistics	MS	X				optional	In person	https://icahn.mssm.edu/education/masters/biostatistics	https://web.archive.org/web/20200831045148/https://icahn.mssm.edu/education/admissions/graduate-education/ms-biostatistics	X	X		X
Mount Sinai Icahn School of Medicine	New York, NY	71 (tie)	2.4	Epidemiology	MS	X				optional	In person	https://icahn.mssm.edu/education/admissions/graduate-education/ms-epidemiology	https://web.archive.org/web/20200831045427/https://icahn.mssm.edu/education/admissions/graduate-education/ms-epidemiology	X	X			X
Mount Sinai Icahn School of Medicine	New York, NY	71 (tie)	2.4	Genetic Counseling	MS				X		In person	https://icahn.mssm.edu/education/admissions/graduate-education/ms-genetic-counseling		X	X
Uniformed Services University of the Health Sciences	Bethesda, MD	71 (tie)	2.4	Health Administration and Policy	MHAP		X	Fall 2021		optional	In person	https://www.usuhs.edu/mhap	https://web.archive.org/web/20200914013024/https://www.usuhs.edu/graded	X	X					X
Uniformed Services University of the Health Sciences	Bethesda, MD	71 (tie)	2.4	Epidemiology and Biostatistics	MPH		X	Fall 2021		optional	In person	https://www.usuhs.edu/pmb/epid-biostats	https://web.archive.org/web/20200914013024/https://www.usuhs.edu/graded	X	X		X	X
Uniformed Services University of the Health Sciences	Bethesda, MD	71 (tie)	2.4	General Preventive Public Health	MPH		X	Fall 2021		optional	In person	https://www.usuhs.edu/pmb/grad-programs	https://web.archive.org/web/20200914013024/https://www.usuhs.edu/graded	X	X
Uniformed Services University of the Health Sciences	Bethesda, MD	71 (tie)	2.4	Global Health	MPH		X	Fall 2021		optional	In person	https://www.usuhs.edu/pmb/grad-programs	https://web.archive.org/web/20200914013024/https://www.usuhs.edu/graded	X	X
Uniformed Services University of the Health Sciences	Bethesda, MD	71 (tie)	2.4	Health Services Administration	MPH		X	Fall 2021		optional	In person	https://www.usuhs.edu/pmb/grad-programs	https://web.archive.org/web/20200914013024/https://www.usuhs.edu/graded	X	X					X
Uniformed Services University of the Health Sciences	Bethesda, MD	71 (tie)	2.4	Occupational and Environmental Health Science	MPH		X	Fall 2021		optional	In person	https://www.usuhs.edu/pmb/oeh	https://web.archive.org/web/20200914013024/https://www.usuhs.edu/graded	X	X				X
Uniformed Services University of the Health Sciences	Bethesda, MD	71 (tie)	2.4	Tropical Public Health	MPH		X	Fall 2021		optional	In person	https://www.usuhs.edu/pmb/tph-grad-ed	https://web.archive.org/web/20200914013024/https://www.usuhs.edu/graded	X	X
Uniformed Services University of the Health Sciences	Bethesda, MD	71 (tie)	2.4	Environmental and Occupational Health	MSPH		X	Fall 2021		optional	In person	https://www.usuhs.edu/pmb/oeh	https://web.archive.org/web/20200914013024/https://www.usuhs.edu/graded	X	X				X
Uniformed Services University of the Health Sciences	Bethesda, MD	71 (tie)	2.4	Medical Zoology	MSPH		X	Fall 2021		optional	In person	https://www.usuhs.edu/pmb/tph-grad-ed	https://web.archive.org/web/20200914013024/https://www.usuhs.edu/graded	X	X
Uniformed Services University of the Health Sciences	Bethesda, MD	71 (tie)	2.4	Tropical Medicine and Hygiene	MTMH		X	Fall 2021		optional	In person	https://www.usuhs.edu/pmb/tph-grad-ed	https://web.archive.org/web/20200914013024/https://www.usuhs.edu/graded	X	X
Uniformed Services University of the Health Sciences	Bethesda, MD	71 (tie)	2.4	Environmental Health Sciences	PhD		X	Fall 2021		optional	In person	https://www.usuhs.edu/pmb/oeh-grad-ed	https://web.archive.org/web/20200914013024/https://www.usuhs.edu/graded	X		X			X
Uniformed Services University of the Health Sciences	Bethesda, MD	71 (tie)	2.4	Medical Zoology	PhD		X	Fall 2021		optional	In person	https://www.usuhs.edu/pmb/tph-grad-ed	https://web.archive.org/web/20200914013024/https://www.usuhs.edu/graded	X		X
Uniformed Services University of the Health Sciences	Bethesda, MD	71 (tie)	2.4	Public Health	PhD		X	Fall 2021		optional	In person	https://www.usuhs.edu/pmb/grad-programs	https://web.archive.org/web/20200914013024/https://www.usuhs.edu/graded	X		X
University of Illinois--Urbana-Champaign	Champaign, IL	71 (tie)	2.4	Epidemiology	MPH	X				optional	In person	https://ahs.illinois.edu/mph-home	https://web.archive.org/web/20200914020415/https://ahs.illinois.edu/how-to-apply	X	X			X
University of Illinois--Urbana-Champaign	Champaign, IL	71 (tie)	2.4	Health Behavior and Promotion	MPH	X				optional	In person	https://ahs.illinois.edu/mph-home	https://web.archive.org/web/20200914020415/https://ahs.illinois.edu/how-to-apply	X	X						X
University of Illinois--Urbana-Champaign	Champaign, IL	71 (tie)	2.4	Community Health	MS				X		In person	https://ahs.illinois.edu/master-of-science-in-community-health		X	X						X
University of Illinois--Urbana-Champaign	Champaign, IL	71 (tie)	2.4	Health Technology	MS				X		In person	https://ahs.illinois.edu/ht-overview		X	X
University of Illinois--Urbana-Champaign	Champaign, IL	71 (tie)	2.4	Health Administration	MSHA	X				optional	In person	https://ahs.illinois.edu/msha-overview	https://web.archive.org/web/20200914020156/https://ahs.illinois.edu/msha-reqs	X	X
University of Illinois--Urbana-Champaign	Champaign, IL	71 (tie)	2.4	Community Health	PhD				X		In person	https://ahs.illinois.edu/community-health/phd		X		X					X
University of North Carolina--Charlotte	Charlotte, NC	71 (tie)	2.4	Health Administration	MHA		X	Fall 2021, Summer 2021		optional?	In person	https://publichealth.uncc.edu/graduate-programs/master-health-administration-mha	https://web.archive.org/web/20200914020837/https://publichealth.uncc.edu/degrees-and-programs/phs-graduate-programs/master-health-administration-mha/admissions	X	X
University of North Carolina--Charlotte	Charlotte, NC	71 (tie)	2.4	Community Health Practice	MPH		X	Fall 2021, Spring 2021		optional?	In person	https://publichealth.uncc.edu/degrees-and-programs/phs-graduate-programs/master-public-health-mph/mph-curriculum-overview	https://archive.vn/7sHq4	X	X						X
University of North Carolina--Charlotte	Charlotte, NC	71 (tie)	2.4	Epidemiology	MPH		X	Fall 2021, Spring 2021		optional?	In person	https://publichealth.uncc.edu/degrees-and-programs/phs-graduate-programs/master-public-health-mph/mph-curriculum-overview	https://archive.vn/7sHq4	X	X			X
University of North Carolina--Charlotte	Charlotte, NC	71 (tie)	2.4	Physical Activty and Nutrition	MPH		X	Fall 2021, Spring 2021		optional?	In person	https://publichealth.uncc.edu/degrees-and-programs/phs-graduate-programs/master-public-health-mph/mph-curriculum-overview	https://archive.vn/7sHq4	X	X
University of North Carolina--Charlotte	Charlotte, NC	71 (tie)	2.4	Population Health Analytics	MPH		X	Fall 2021, Spring 2021		optional?	In person	https://publichealth.uncc.edu/degrees-and-programs/phs-graduate-programs/master-public-health-mph/mph-curriculum-overview	https://archive.vn/7sHq4	X	X
University of North Carolina--Charlotte	Charlotte, NC	71 (tie)	2.4	Health Informatics and Analytics	MS				X		In person	https://hia.uncc.edu/academics/health-informatics-masters-program		X	X
University of North Carolina--Charlotte	Charlotte, NC	71 (tie)	2.4	Health Services Research	PhD				X		In person	https://publichealth.uncc.edu/academic-programs/graduate-programs/phd-health-services-research		X		X				X
University of North Carolina--Charlotte	Charlotte, NC	71 (tie)	2.4	Public Health Sciences: Behavioral Sciences	PhD				X		In person	https://publichealth.uncc.edu/degrees-and-programs/phs-graduate-programs/phd-public-health-sciences		X		X					X
Virginia Commonwealth University	Richmond, VA	71 (tie)	2.4	Applied Public Health	MPH	X				-	In person	http://bulletin.vcu.edu/graduate/school-medicine/public-health-mph-concentration-applied/	https://web.archive.org/web/20200914021705/https://familymedicine.vcu.edu/epidemiology/epidemiology-graduate-programs/apply-now/	X	X
Virginia Commonwealth University	Richmond, VA	71 (tie)	2.4	Epidemiology	MPH	X				-	In person	http://bulletin.vcu.edu/graduate/school-medicine/public-health-mph-concentration-epidemiology/	https://web.archive.org/web/20200914021705/https://familymedicine.vcu.edu/epidemiology/epidemiology-graduate-programs/apply-now/	X	X			X
Virginia Commonwealth University	Richmond, VA	71 (tie)	2.4	Biostatistics	MS				X		In person	https://biostatistics.vcu.edu/education/ms/		X	X		X
Virginia Commonwealth University	Richmond, VA	71 (tie)	2.4	Biostatistics	PhD				X		In person	https://biostatistics.vcu.edu/education/phd/		X		X	X
Virginia Commonwealth University	Richmond, VA	71 (tie)	2.4	Epidemiology	PhD				X		In person	https://familymedicine.vcu.edu/epidemiology/epidemiology-graduate-programs/phd-in-epidemiology-program/		X		X		X
Florida International University	Miami, FL	78 (tie)	2.3	Biostatistics	MPH	X				-	In person	https://stempel.fiu.edu/academics/public-health/biostatistics/	https://web.archive.org/web/20200914022759/https://stempel.fiu.edu/degree/master-public-health/	X	X		X
Florida International University	Miami, FL	78 (tie)	2.3	Environmental Health Sciences	MPH	X				-	In person	https://stempel.fiu.edu/academics/public-health/environmental-health-sciences/	https://web.archive.org/web/20200914022759/https://stempel.fiu.edu/degree/master-public-health/	X	X				X
Florida International University	Miami, FL	78 (tie)	2.3	Epidemiology	MPH	X				-	In person	https://stempel.fiu.edu/academics/public-health/epidemiology/	https://web.archive.org/web/20200914022759/https://stempel.fiu.edu/degree/master-public-health/	X	X			X
Florida International University	Miami, FL	78 (tie)	2.3	Health Policy and Management	MPH	X				-	In person	https://stempel.fiu.edu/academics/public-health/health-policy-management/	https://web.archive.org/web/20200914022759/https://stempel.fiu.edu/degree/master-public-health/	X	X					X
Florida International University	Miami, FL	78 (tie)	2.3	Health Promotion and Disease Prevention	MPH	X				-	In person	https://stempel.fiu.edu/academics/public-health/health-promotion-disease-prevention/	https://web.archive.org/web/20200914022759/https://stempel.fiu.edu/degree/master-public-health/	X	X						X
Florida International University	Miami, FL	78 (tie)	2.3	Public Health	MPH	X				-	Online	https://fiuonline.fiu.edu/programs/online-graduate-degrees/master-of-public-health.php	https://web.archive.org/web/20200914023342/https://fiuonline.fiu.edu/programs/online-graduate-degrees/master-of-public-health.php	X	X
Florida International University	Miami, FL	78 (tie)	2.3	Dietetics and Nutrition	MS	X				-	In person	https://stempel.fiu.edu/academics/department-dietetics-nutrition/graduate-programs/	https://web.archive.org/web/20200914022904/https://stempel.fiu.edu/degree/master-science-dietetics-nutrition/	X	X
Florida International University	Miami, FL	78 (tie)	2.3	Disaster Management	MS	X				-	In person, online	https://aidp.fiu.edu/degree-programs/graduate-program/index.html	https://web.archive.org/web/20200914023022/https://aidp.fiu.edu/degree-programs/graduate-program/admission/index.html	X	X
Florida International University	Miami, FL	78 (tie)	2.3	Dietetics and Nutrition	PhD	X				-	In person	https://stempel.fiu.edu/academics/department-dietetics-nutrition/ph-d-programs/	https://web.archive.org/web/20200914023113/https://stempel.fiu.edu/degree/ph-d-dietetics-nutrition/	X		X
Florida International University	Miami, FL	78 (tie)	2.3	Public Health: Brain, Behavior and the Environment	PhD				X		In person	https://stempel.fiu.edu/academics/public-health/environmental-health-sciences/		X		X			X
Florida International University	Miami, FL	78 (tie)	2.3	Public Health: Environmental Toxicology	PhD				X		In person	https://stempel.fiu.edu/academics/public-health/environmental-health-sciences/		X		X			X
Florida International University	Miami, FL	78 (tie)	2.3	Public Health: Health Promotion and Disease Prevention	PhD				X		In person	https://stempel.fiu.edu/academics/public-health/health-promotion-disease-prevention/		X		X					X
Florida International University	Miami, FL	78 (tie)	2.3	Public Health: Health Systems Research	PhD				X		In person	https://stempel.fiu.edu/academics/public-health/health-policy-management/		X		X
Florida International University	Miami, FL	78 (tie)	2.3	Public Heath: Epidemiology	PhD				X		In person	https://stempel.fiu.edu/academics/public-health/epidemiology/		X		X		X
George Mason University	Fairfax, VA	78 (tie)	2.3	Community Health Promotion	MPH	X				-	In person	https://publichealth.gmu.edu/program/view/19951	https://web.archive.org/web/20200914024249/https://publichealth.gmu.edu/admissions/graduate-admissions	X	X						X
George Mason University	Fairfax, VA	78 (tie)	2.3	Epidemiology	MPH	X				-	In person	https://publichealth.gmu.edu/program/view/19951	https://web.archive.org/web/20200914024249/https://publichealth.gmu.edu/admissions/graduate-admissions	X	X			X
George Mason University	Fairfax, VA	78 (tie)	2.3	Food Security and Nutrition	MPH	X				-	In person	https://publichealth.gmu.edu/program/view/19951	https://web.archive.org/web/20200914024249/https://publichealth.gmu.edu/admissions/graduate-admissions	X	X
George Mason University	Fairfax, VA	78 (tie)	2.3	Global Health	MPH	X				-	In person	https://publichealth.gmu.edu/program/view/19951	https://web.archive.org/web/20200914024249/https://publichealth.gmu.edu/admissions/graduate-admissions	X	X
George Mason University	Fairfax, VA	78 (tie)	2.3	Health Policy	MPH	X				-	In person	https://publichealth.gmu.edu/program/view/19951	https://web.archive.org/web/20200914024249/https://publichealth.gmu.edu/admissions/graduate-admissions	X	X					X
George Mason University	Fairfax, VA	78 (tie)	2.3	Public Health Communication	MPH	X				-	In person	https://publichealth.gmu.edu/program/view/19951	https://web.archive.org/web/20200914024249/https://publichealth.gmu.edu/admissions/graduate-admissions	X	X						X
George Mason University	Fairfax, VA	78 (tie)	2.3	Biostatistics	MS	X				-	In person	https://catalog.gmu.edu/colleges-schools/engineering/statistics/biostatistics-ms/	https://web.archive.org/web/20200914024629/https://admissions.gmu.edu/grad/application-deadlines-and-requirements/?academicUnit=VS&_ga=1.107632321.273102085.1480697294	X	X		X
George Mason University	Fairfax, VA	78 (tie)	2.3	Global Health	MS	X				-	In person	https://publichealth.gmu.edu/program/view/19953	https://web.archive.org/web/20200914024249/https://publichealth.gmu.edu/admissions/graduate-admissions	X	X
George Mason University	Fairfax, VA	78 (tie)	2.3	Public Health: Epidemiology	PhD	X				-	In person	https://publichealth.gmu.edu/program/view/588181	https://web.archive.org/web/20200914024249/https://publichealth.gmu.edu/admissions/graduate-admissions	X		X		X
George Mason University	Fairfax, VA	78 (tie)	2.3	Public Health: Social and Behavioral Sciences	PhD	X				-	In person	https://publichealth.gmu.edu/program/view/588181	https://web.archive.org/web/20200914024249/https://publichealth.gmu.edu/admissions/graduate-admissions	X		X					X
Northeastern University	Boston, MA	78 (tie)	2.3	Urban Health	MPH			Fall 2020		optional	Hybrid, online	https://www.northeastern.edu/graduate/program/master-of-public-health-online-655/	https://archive.vn/SLp2x	X	X
Northeastern University	Boston, MA	78 (tie)	2.3	Health Informatics	MS	X				-	In person, online	https://www.northeastern.edu/graduate/program/master-of-science-in-health-informatics-boston-5247/	https://web.archive.org/web/20200914025557/https://www.northeastern.edu/graduate/program/master-of-science-in-health-informatics-boston-5247/	X	X
San Francisco State University	San Francisco, CA	78 (tie)	2.3	Community Health Education	MPH				X		In person	https://healthed.sfsu.edu/mph/overview		X	X						X
Stony Brook University--SUNY	Stony Brook, NY	78 (tie)	2.3	Health Administration	MHA	X				optional	In person	https://publichealth.stonybrookmedicine.edu/mha	https://web.archive.org/web/20200920152131/https://publichealth.stonybrookmedicine.edu/admissions/MHA , https://web.archive.org/web/20200823194540/https://publichealth.stonybrookmedicine.edu/admissions/MHA	X	X
Stony Brook University--SUNY	Stony Brook, NY	78 (tie)	2.3	Community Health	MPH	X				optional	In person	https://publichealth.stonybrookmedicine.edu/academics/mph/communityhealth	https://web.archive.org/web/20200920151947/https://publichealth.stonybrookmedicine.edu/admissions/MPH , https://archive.vn/7kUI9	X	X						X
Stony Brook University--SUNY	Stony Brook, NY	78 (tie)	2.3	Health Analytics	MPH	X				optional	In person	https://publichealth.stonybrookmedicine.edu/academics/mph/healthanalytics	https://web.archive.org/web/20200920151947/https://publichealth.stonybrookmedicine.edu/admissions/MPH , https://archive.vn/7kUI9	X	X
Stony Brook University--SUNY	Stony Brook, NY	78 (tie)	2.3	Health Policy and Management	MPH	X				optional	In person	https://publichealth.stonybrookmedicine.edu/academics/mph/healthpolicy	https://web.archive.org/web/20200920151947/https://publichealth.stonybrookmedicine.edu/admissions/MPH , https://archive.vn/7kUI9	X	X					X
Stony Brook University--SUNY	Stony Brook, NY	78 (tie)	2.3	Epidemiology and Clinical Research	MS				X		In person	https://publichealth.stonybrookmedicine.edu/msecr		X	X			X
Stony Brook University--SUNY	Stony Brook, NY	78 (tie)	2.3	Population Health and Clinical Outcomes Research	PhD	X				optional	In person	https://publichealth.stonybrookmedicine.edu/admissions/phcor	https://web.archive.org/web/20200920152245/https://publichealth.stonybrookmedicine.edu/admissions/phcor , https://web.archive.org/web/20200823194417/https://publichealth.stonybrookmedicine.edu/admissions/phcor	X		X
University of Arkansas for Medical Sciences	Little Rock, AR	78 (tie)	2.3	Public Health Leadership	DrPH				X		In person	https://publichealth.uams.edu/academics/doctoral/drph/		X		X
University of Arkansas for Medical Sciences	Little Rock, AR	78 (tie)	2.3	Health Administration	MHA				X		In person	https://publichealth.uams.edu/academics/masters/msha/		X	X
University of Arkansas for Medical Sciences	Little Rock, AR	78 (tie)	2.3	Biostatistics	MPH				X		In person	https://publichealth.uams.edu/academics/masters/master-of-public-health/biostats/		X	X		X
University of Arkansas for Medical Sciences	Little Rock, AR	78 (tie)	2.3	Environmental and Occupational Health	MPH				X		In person	https://publichealth.uams.edu/academics/masters/master-of-public-health/eoh/		X	X				X
University of Arkansas for Medical Sciences	Little Rock, AR	78 (tie)	2.3	Epidemiology	MPH				X		In person	https://publichealth.uams.edu/academics/masters/master-of-public-health/epi/		X	X			X
University of Arkansas for Medical Sciences	Little Rock, AR	78 (tie)	2.3	Health Behavior and Health Education	MPH				X		In person	https://publichealth.uams.edu/academics/masters/master-of-public-health/hbhe/		X	X						X
University of Arkansas for Medical Sciences	Little Rock, AR	78 (tie)	2.3	Health Policy and Management	MPH				X		In person	https://publichealth.uams.edu/academics/masters/master-of-public-health/hpm/		X	X					X
University of Arkansas for Medical Sciences	Little Rock, AR	78 (tie)	2.3	Rural and Global Public Health	MPH				X		Online	https://publichealth.uams.edu/academics/masters/master-of-public-health/mph-concentration-in-rural-public-health-practice/		X	X
University of Arkansas for Medical Sciences	Little Rock, AR	78 (tie)	2.3	Healthcare Data Analytics	MS				X		In person	https://publichealth.uams.edu/academics/masters/academics-masters-mshcda/		X	X
University of Arkansas for Medical Sciences	Little Rock, AR	78 (tie)	2.3	Epidemiology	PhD				X		In person	https://publichealth.uams.edu/academics/doctoral/phd-epidemiology/		X		X		X
University of Arkansas for Medical Sciences	Little Rock, AR	78 (tie)	2.3	Health Promotion and Prevention Research	PhD				X		In person	https://publichealth.uams.edu/academics/doctoral/phdhppr/		X		X					X
University of Arkansas for Medical Sciences	Little Rock, AR	78 (tie)	2.3	Health Systems and Services Research	PhD				X		In person	https://publichealth.uams.edu/academics/doctoral/phdhsr/		X		X				X
University of Connecticut	Farmington, CT	78 (tie)	2.3	Public Health	MPH	X				strongly recommended	In person	https://mph.uconn.edu/m-p-h-program/	https://web.archive.org/web/20200914031127/https://mph.uconn.edu/admissions/	X	X
University of Connecticut	Farmington, CT	78 (tie)	2.3	Biostatistics	MS				X		In person	https://stat.uconn.edu/m-s-in-biostatistics/		X	X		X
University of Connecticut	Farmington, CT	78 (tie)	2.3	Public Health	PhD	X				optional?	In person	https://health.uconn.edu/public-health-sciences/ph-d-in-public-health/	https://web.archive.org/web/20200914031307/https://phd.publichealth.uconn.edu/admissions/	X		X
University of New Hampshire	Durham, NH	78 (tie)	2.3	Public Health	MPH	X				-	In person (night classes)	https://chhs.unh.edu/health-management-policy/program/mph/public-health	https://web.archive.org/web/20200914031858/https://chhs.unh.edu/health-management-policy/program/mph/public-health	X	X
University of New Hampshire	Durham, NH	78 (tie)	2.3	Health Data Science	MS	X				-	In person	https://chhs.unh.edu/health-management-policy/program/ms/health-data-science	https://web.archive.org/web/20200914032044/https://chhs.unh.edu/health-management-policy/program/ms/health-data-science	X	X
University of North Carolina--Greensboro	Greensboro, NC	78 (tie)	2.3	Community Health Education	MPH	X				optional?	In person	https://phe.uncg.edu/masters-of-public-health-education/	https://web.archive.org/web/20200914032933/https://phe.uncg.edu/programs-2/admissions-overview/mph-in-community-health-education/admissions/	X	X						X
University of North Carolina--Greensboro	Greensboro, NC	78 (tie)	2.3	Community Health Education	PhD	X				optional?	In person	https://phe.uncg.edu/ph-d-in-community-health-education/	https://web.archive.org/web/20200914032827/https://phe.uncg.edu/ph-d-in-community-health-education/admissions/	X		X					X
University of Tennessee	Knoxville, TN	78 (tie)	2.3	Public Health	DrPH				X		In person	https://publichealth.utk.edu/degree-programs/drph/		X		X
University of Tennessee	Knoxville, TN	78 (tie)	2.3	Community Health Education	MPH				X		In person	https://publichealth.utk.edu/degree-programs/mph/che-2/		X	X						X
University of Tennessee	Knoxville, TN	78 (tie)	2.3	Epidemiology	MPH				X		In person	https://publichealth.utk.edu/degree-programs/mph/mph-concentration-epidemiology/		X	X			X
University of Tennessee	Knoxville, TN	78 (tie)	2.3	Health Policy and Management	MPH				X		In person	https://publichealth.utk.edu/degree-programs/mph/hpm/		X	X					X
University of Tennessee	Knoxville, TN	78 (tie)	2.3	Veterinary Public Health	MPH				X		In person	https://publichealth.utk.edu/degree-programs/mph/vph/		X	X
University of Tennessee	Knoxville, TN	78 (tie)	2.3	Public Health Nutrition	MS				X		In person	https://nutrition.utk.edu/public-health-nutrition-ms-program/		X	X
University of Tennessee	Knoxville, TN	78 (tie)	2.3	Nutritional Sciences: Community Nutrition	PhD				X		In person	https://nutrition.utk.edu/nutritional-sciences-ph-d-program/		X		X		X	X
University of Texas Medical Branch--Galveston	Galveston, TX	78 (tie)	2.3	Aerospace Medicine	MPH	X				-	In person	https://www.utmb.edu/pmph/education/public-health/public-health-aerospace-medicine-track-mph	https://web.archive.org/web/20200914033919/https://www.utmb.edu/pmph/education/prospective-students/frequently-asked-application-questions	X	X
University of Texas Medical Branch--Galveston	Galveston, TX	78 (tie)	2.3	Biostatistics	MPH	X				-	In person	https://www.utmb.edu/pmph/education/public-health/public-health-biostatistics-mph	https://web.archive.org/web/20200914033919/https://www.utmb.edu/pmph/education/prospective-students/frequently-asked-application-questions	X	X		X
University of Texas Medical Branch--Galveston	Galveston, TX	78 (tie)	2.3	Epidemiology	MPH	X				-	In person	https://www.utmb.edu/pmph/education/public-health/public-health-epidemiology-mph	https://web.archive.org/web/20200914033919/https://www.utmb.edu/pmph/education/prospective-students/frequently-asked-application-questions	X	X			X
University of Texas Medical Branch--Galveston	Galveston, TX	78 (tie)	2.3	Population Health Sciences	PhD	X				-	In person	https://www.utmb.edu/pmph/education/population-health-sciences-phd	https://web.archive.org/web/20200914033919/https://www.utmb.edu/pmph/education/prospective-students/frequently-asked-application-questions	X		X
University of Texas Medical Branch--Galveston	Galveston, TX	78 (tie)	2.3	Rehabilitation Sciences	PhD	X				-	In person	https://www.utmb.edu/rehabsciences	https://web.archive.org/web/20200914033919/https://www.utmb.edu/pmph/education/prospective-students/frequently-asked-application-questions	X		X
Brigham Young University	Provo, UT	89 (tie)	2.2	Public Health	MPH				X		In person	https://ph.byu.edu/mph		X	X
Claremont Graduate University	Claremont, CA	89 (tie)	2.2	Public Health	DrPH				X		In person	https://www.cgu.edu/academics/program/doctor-public-health/		X		X
Claremont Graduate University	Claremont, CA	89 (tie)	2.2	Applied Biostatistics and Epidemiology	MPH	X				optional	In person	https://www.cgu.edu/academics/program/ma-public-health/	https://web.archive.org/web/20200914034512/https://www.cgu.edu/academics/program/ma-public-health/application-guidelines/	X	X		X	X
Claremont Graduate University	Claremont, CA	89 (tie)	2.2	Health Promotion, Education, and Evaluation	MPH	X				optional	In person	https://www.cgu.edu/academics/program/ma-public-health/	https://web.archive.org/web/20200914034512/https://www.cgu.edu/academics/program/ma-public-health/application-guidelines/	X	X						X
Claremont Graduate University	Claremont, CA	89 (tie)	2.2	Leadership and Management	MPH	X				optional	In person	https://www.cgu.edu/academics/program/ma-public-health/	https://web.archive.org/web/20200914034512/https://www.cgu.edu/academics/program/ma-public-health/application-guidelines/	X	X					X
Claremont Graduate University	Claremont, CA	89 (tie)	2.2	Health Promotion Sciences	PhD				X		In person	https://www.cgu.edu/academics/program/health-promotion-sciences/		X		X					X
Loyola University Chicago	Maywood, IL	89 (tie)	2.2	Health Administration	MHA	X				optional	In person	https://www.luc.edu/parkinson/academics/areasofstudy/healthcareadministration/masterinhealthcareadministration/	https://web.archive.org/web/20200914034958/https://www.luc.edu/parkinson/academics/areasofstudy/healthcareadministration/masterinhealthcareadministration/	X	X
Loyola University Chicago	Maywood, IL	89 (tie)	2.2	Epidemiology	MPH				X		In person, online, hybrid	https://www.luc.edu/parkinson/academics/areasofstudy/publichealth/masterofpublichealth/		X	X			X
Loyola University Chicago	Maywood, IL	89 (tie)	2.2	Global Health Equity	MPH				X		In person, online, hybrid	https://www.luc.edu/parkinson/academics/areasofstudy/publichealth/masterofpublichealth/		X	X
Loyola University Chicago	Maywood, IL	89 (tie)	2.2	Policy and Management	MPH				X		In person, online, hybrid	https://www.luc.edu/parkinson/academics/areasofstudy/publichealth/masterofpublichealth/		X	X					X
Loyola University Chicago	Maywood, IL	89 (tie)	2.2	Health Informatics	MS	X				optional	In person, online, hybrid	https://www.luc.edu/mshealthinformatics/	https://web.archive.org/web/20200920152910/https://www.luc.edu/mshealthinformatics/	X	X
SUNY Upstate Medical University	Syracuse, NY	89 (tie)	2.2	Data and Analytics	MPH	X				-	In person	https://www.upstate.edu/mph/academic/mph_degree/index.php	https://web.archive.org/web/20200914035534/https://www.upstate.edu/mph/admissions/mph-admissions.php	X	X
Teachers College, Columbia University	New York, NY	89 (tie)	2.2	Health Education	MA	X				-	In person	https://www.tc.columbia.edu/health-and-behavior-studies/health-education/academics/	https://web.archive.org/web/20200916033029/https://www.tc.columbia.edu/admission/how-to-apply/faqs/ , https://web.archive.org/web/20200916032938/https://www.tc.columbia.edu/academics/programs-search/	X	X						X
Teachers College, Columbia University	New York, NY	89 (tie)	2.2	Health Education	MS	X				-	In person	https://www.tc.columbia.edu/health-and-behavior-studies/health-education/academics/	https://web.archive.org/web/20200916033029/https://www.tc.columbia.edu/admission/how-to-apply/faqs/ , https://web.archive.org/web/20200916032938/https://www.tc.columbia.edu/academics/programs-search/	X	X						X
Teachers College, Columbia University	New York, NY	89 (tie)	2.2	Health Education	PhD	X				-	In person	https://www.tc.columbia.edu/health-and-behavior-studies/health-education/academics/	https://web.archive.org/web/20200916033029/https://www.tc.columbia.edu/admission/how-to-apply/faqs/ , https://web.archive.org/web/20200916032938/https://www.tc.columbia.edu/academics/programs-search/	X		X					X
University of Cincinnati	Cincinnati, OH	89 (tie)	2.2	Biostatistics	MPH	X				-	In person	https://med.uc.edu/eh/divisions/publichealth/concentrations/biostatistics	https://web.archive.org/web/20200916034059/https://med2.uc.edu/eh/divisions/publichealth/apply	X	X		X
University of Cincinnati	Cincinnati, OH	89 (tie)	2.2	Environmental Public Health	MPH	X				-	In person	https://med.uc.edu/eh/divisions/publichealth/concentrations/environmental-public-health	https://web.archive.org/web/20200916034059/https://med2.uc.edu/eh/divisions/publichealth/apply	X	X				X
University of Cincinnati	Cincinnati, OH	89 (tie)	2.2	Epidemiology	MPH	X				-	In person	https://med.uc.edu/eh/divisions/publichealth/concentrations/epidemiology	https://web.archive.org/web/20200916034059/https://med2.uc.edu/eh/divisions/publichealth/apply	X	X			X
University of Cincinnati	Cincinnati, OH	89 (tie)	2.2	Global Health	MPH	X				-	In person	https://med.uc.edu/eh/divisions/publichealth/concentrations/global-health	https://web.archive.org/web/20200916034059/https://med2.uc.edu/eh/divisions/publichealth/apply	X	X
University of Cincinnati	Cincinnati, OH	89 (tie)	2.2	Health Education and Promotion	MPH	X				-	In person	https://med.uc.edu/eh/divisions/publichealth/concentrations/health-education-promotion	https://web.archive.org/web/20200916034059/https://med2.uc.edu/eh/divisions/publichealth/apply	X	X						X
University of Cincinnati	Cincinnati, OH	89 (tie)	2.2	Health Services Management	MPH	X				-	In person	https://med.uc.edu/eh/divisions/publichealth/concentrations/health-services-management	https://web.archive.org/web/20200916034059/https://med2.uc.edu/eh/divisions/publichealth/apply	X	X					X
University of Cincinnati	Cincinnati, OH	89 (tie)	2.2	Occupational Public Health	MPH	X				-	In person	https://med.uc.edu/eh/divisions/publichealth/concentrations/occupational-public-health	https://web.archive.org/web/20200916034059/https://med2.uc.edu/eh/divisions/publichealth/apply	X	X				X
University of Cincinnati	Cincinnati, OH	89 (tie)	2.2	Biostatistics	MS				X		In person	https://med2.uc.edu/eh/divisions/bio/programs/ms-biostatistics		X	X		X
University of Cincinnati	Cincinnati, OH	89 (tie)	2.2	Clinical and Translational Research	MS				X		In person	https://med2.uc.edu/eh/divisions/epi/programs/ms-clinical-translational-research		X	X
University of Cincinnati	Cincinnati, OH	89 (tie)	2.2	Environmental and Industrial Hygiene	MS	X				-	In person	https://med2.uc.edu/eh/divisions/ih/programs/ms-environmental-industrial-hygiene	https://web.archive.org/web/20200916035520/https://med2.uc.edu/eh/divisions/ih/how-to-apply	X	X
University of Cincinnati	Cincinnati, OH	89 (tie)	2.2	Epidemiology	MS				X		In person	https://med2.uc.edu/eh/divisions/epi/programs/ms-epidemiology		X	X			X
University of Cincinnati	Cincinnati, OH	89 (tie)	2.2	Biostatistics	PhD				X		In person	https://med2.uc.edu/eh/divisions/bio/programs/phd-biostatistics		X		X	X
University of Cincinnati	Cincinnati, OH	89 (tie)	2.2	Environmental and Industrial Hygiene	PhD	X				-	In person	https://med2.uc.edu/eh/divisions/ih/programs/phd-environmental-industrial-hygiene	https://web.archive.org/web/20200916035520/https://med2.uc.edu/eh/divisions/ih/how-to-apply	X		X
University of Cincinnati	Cincinnati, OH	89 (tie)	2.2	Environmental and Industrial Hygiene	PhD				X		In person	https://med2.uc.edu/eh/divisions/ih/programs/phd-environmental-industrial-hygiene		X		X
University of Cincinnati	Cincinnati, OH	89 (tie)	2.2	Environmental Genetics and Molecular Toxicology	PhD	X				-	In person	https://med2.uc.edu/eh/divisions/egmt/academic-programs/phd-environmental-genetics-and-molecular-toxicology	https://web.archive.org/web/20200916035520/https://med2.uc.edu/eh/divisions/ih/how-to-apply	X		X			X
University of Cincinnati	Cincinnati, OH	89 (tie)	2.2	Epidemiology	PhD				X		In person	https://med2.uc.edu/eh/divisions/epi/programs/phd-epidemiology		X		X		X
University of Hawaii--Manoa	Honolulu, HI	89 (tie)	2.2	Epidemiology	MPH		X	Fall 2021, Spring 2021		optional	In person	http://manoa.hawaii.edu/publichealth/specializations/epidemiology	https://web.archive.org/web/20200823204043/http://manoa.hawaii.edu/publichealth/node/368	X	X			X
University of Hawaii--Manoa	Honolulu, HI	89 (tie)	2.2	​Health Policy and Management	MPH		X	Fall 2021, Spring 2021		optional	In person	http://manoa.hawaii.edu/publichealth/specializations/health-policy-and-management	https://web.archive.org/web/20200823204043/http://manoa.hawaii.edu/publichealth/node/368	X	X					X
University of Hawaii--Manoa	Honolulu, HI	89 (tie)	2.2	Native Hawaiian and Indigenous Health	MPH		X	Fall 2021, Spring 2021		optional	In person	http://manoa.hawaii.edu/publichealth/specializations/native-hawaiian-and-indigenous-health	https://web.archive.org/web/20200823204043/http://manoa.hawaii.edu/publichealth/node/368	X	X
University of Hawaii--Manoa	Honolulu, HI	89 (tie)	2.2	Social and Behavioral Health Sciences	MPH		X	Fall 2021, Spring 2021		optional	In person	http://manoa.hawaii.edu/publichealth/specializations/social-and-behavioral-health-sciences	https://web.archive.org/web/20200823204043/http://manoa.hawaii.edu/publichealth/node/368	X	X						X
University of Hawaii--Manoa	Honolulu, HI	89 (tie)	2.2	Epidemiology	MS		X	Fall 2021, Spring 2021		optional	In person	http://manoa.hawaii.edu/publichealth/specializations/epidemiology	https://web.archive.org/web/20200823204043/http://manoa.hawaii.edu/publichealth/node/368	X	X			X
University of Hawaii--Manoa	Honolulu, HI	89 (tie)	2.2	Epidemiology	PhD		X	Fall 2021, Spring 2021		optional	In person	http://manoa.hawaii.edu/publichealth/specializations/phd-in-epidemiology	https://web.archive.org/web/20200823204043/http://manoa.hawaii.edu/publichealth/node/368	X		X		X
University of Hawaii--Manoa	Honolulu, HI	89 (tie)	2.2	Public Health: Community-Based Participatory Research	PhD		X	Fall 2021, Spring 2021		optional	In person	http://manoa.hawaii.edu/publichealth/specializations/phd-in-public-health-community-based-and-translational-research	https://web.archive.org/web/20200823204043/http://manoa.hawaii.edu/publichealth/node/368	X		X					X
University of Missouri	Columbia, MO	89 (tie)	2.2	Health Promotion and Policy	MPH	X				-	In person	https://healthprofessions.missouri.edu/public-health/masters-degree/#emphasis	https://web.archive.org/web/20200916040558/https://healthprofessions.missouri.edu/public-health/masters-degree/	X	X					X	X
University of Missouri	Columbia, MO	89 (tie)	2.2	Health Promotion and Policy	MPH	X				-	Online	https://online.missouri.edu/degreeprograms/health-professions/public-health/masters/	https://web.archive.org/web/20200916040718/https://online.missouri.edu/degreeprograms/health-professions/public-health/masters/admissions.aspx	X	X					X	X
University of Missouri	Columbia, MO	89 (tie)	2.2	Veterinary Public Health	MPH	X				-	In person	https://healthprofessions.missouri.edu/public-health/masters-degree/#emphasis	https://web.archive.org/web/20200916040558/https://healthprofessions.missouri.edu/public-health/masters-degree/	X	X
University of Missouri	Columbia, MO	89 (tie)	2.2	Veterinary Public Health	MPH	X				-	Online	https://online.missouri.edu/degreeprograms/health-professions/veterinary-public-health/masters/	https://web.archive.org/web/20200916040718/https://online.missouri.edu/degreeprograms/health-professions/public-health/masters/admissions.aspx	X	X
University of North Texas Health Science Center	Fort Worth, TX	89 (tie)	2.2	Health Administration	MPA		X	Fall 2021, Fall 2020		optional?	In person	https://www.unthsc.edu/school-of-public-health/future-students/master-health-administration-mha/	https://web.archive.org/web/20200823213540/https://www.unthsc.edu/school-of-public-health/future-students/master-health-administration-mha/ , https://web.archive.org/web/20200530074926/https://www.unthsc.edu/school-of-public-health/future-students/apply-now/covid-19-admissions-policy-updates/	X	X
University of North Texas Health Science Center	Fort Worth, TX	89 (tie)	2.2	Health Administration	MPA		X	Fall 2021, Fall 2020		optional?	Online	https://www.unthsc.edu/school-of-public-health/master-of-health-administration-online/	https://web.archive.org/web/20200826150417/https://www.unthsc.edu/school-of-public-health/master-of-health-administration-online/ , https://web.archive.org/web/20200530074926/https://www.unthsc.edu/school-of-public-health/future-students/apply-now/covid-19-admissions-policy-updates/	X	X
University of North Texas Health Science Center	Fort Worth, TX	89 (tie)	2.2	Biostatistics	MPH		X	Fall 2021, Fall 2020		optional?	In person	https://www.unthsc.edu/school-of-public-health/future-students/master-public-health-program-mph/	https://web.archive.org/web/20200823213332/https://www.unthsc.edu/school-of-public-health/future-students/master-public-health-program-mph/ , https://web.archive.org/web/20200530074926/https://www.unthsc.edu/school-of-public-health/future-students/apply-now/covid-19-admissions-policy-updates/	X	X		X
University of North Texas Health Science Center	Fort Worth, TX	89 (tie)	2.2	Epidemiology	MPH		X	Fall 2021, Fall 2020		optional?	In person	https://www.unthsc.edu/school-of-public-health/future-students/master-public-health-program-mph/	https://web.archive.org/web/20200823213332/https://www.unthsc.edu/school-of-public-health/future-students/master-public-health-program-mph/ , https://web.archive.org/web/20200530074926/https://www.unthsc.edu/school-of-public-health/future-students/apply-now/covid-19-admissions-policy-updates/	X	X			X
University of North Texas Health Science Center	Fort Worth, TX	89 (tie)	2.2	Maternal and Child Health	MPH		X	Fall 2021, Fall 2020		optional?	In person	https://www.unthsc.edu/school-of-public-health/future-students/master-public-health-program-mph/	https://web.archive.org/web/20200823213332/https://www.unthsc.edu/school-of-public-health/future-students/master-public-health-program-mph/ , https://web.archive.org/web/20200530074926/https://www.unthsc.edu/school-of-public-health/future-students/apply-now/covid-19-admissions-policy-updates/	X	X
University of North Texas Health Science Center	Fort Worth, TX	89 (tie)	2.2	Public Health Leadership	MPH		X	Fall 2021, Fall 2020		optional?	In person	https://www.unthsc.edu/school-of-public-health/future-students/master-public-health-program-mph/	https://web.archive.org/web/20200823213332/https://www.unthsc.edu/school-of-public-health/future-students/master-public-health-program-mph/ , https://web.archive.org/web/20200530074926/https://www.unthsc.edu/school-of-public-health/future-students/apply-now/covid-19-admissions-policy-updates/	X	X
University of North Texas Health Science Center	Fort Worth, TX	89 (tie)	2.2	Public Health Leadership	MPH		X	Fall 2021, Fall 2020		optional?	Online	https://www.unthsc.edu/school-of-public-health/future-students/master-public-health-mph-online/	https://web.archive.org/web/20200823220037/https://www.unthsc.edu/school-of-public-health/future-students/master-public-health-mph-online/ , https://web.archive.org/web/20200530074926/https://www.unthsc.edu/school-of-public-health/future-students/apply-now/covid-19-admissions-policy-updates/	X	X
University of North Texas Health Science Center	Fort Worth, TX	89 (tie)	2.2	Epidemiology	MS		X	Fall 2021		optional?	In person	https://www.unthsc.edu/school-of-public-health/future-students/master-of-science/	https://web.archive.org/web/20200823215731/https://www.unthsc.edu/school-of-public-health/future-students/master-of-science/	X	X			X
University of North Texas Health Science Center	Fort Worth, TX	89 (tie)	2.2	Health Behavior Research	MS		X	Fall 2021		optional?	In person	https://www.unthsc.edu/school-of-public-health/future-students/master-of-science/	https://web.archive.org/web/20200823215731/https://www.unthsc.edu/school-of-public-health/future-students/master-of-science/	X	X						X
University of North Texas Health Science Center	Fort Worth, TX	89 (tie)	2.2	Public Health Sciences: Epidemiology	PhD		X	Fall 2021		optional?	In person	https://www.unthsc.edu/school-of-public-health/future-students/phd-public-health-studies/	https://web.archive.org/web/20200823215323/https://www.unthsc.edu/school-of-public-health/future-students/phd-public-health-studies/	X		X		X
University of North Texas Health Science Center	Fort Worth, TX	89 (tie)	2.2	Public Health Sciences: Health Behavior Research	PhD		X	Fall 2021		optional?	In person	https://www.unthsc.edu/school-of-public-health/future-students/phd-public-health-studies/	https://web.archive.org/web/20200823215323/https://www.unthsc.edu/school-of-public-health/future-students/phd-public-health-studies/	X		X					X
University of Puerto Rico	San Juan, PR	89 (tie)	2.2	Environmental Health	DrPH				X		In person	https://sp.rcm.upr.edu/asuntos-academicos/programas-academicos/doctorado-en-salud-publica-drph-con-especialidad-en-salud-ambiental/		X		X			X
University of Puerto Rico	San Juan, PR	89 (tie)	2.2	Health Systems Analysis and Management	DrPH				X		In person	https://sp.rcm.upr.edu/asuntos-academicos/programas-academicos/doctorado-en-salud-publica-con-especialidad-en-analisis-de-sistemas-de-salud-y-gerencia-drph-hsam/		X		X				X
University of Puerto Rico	San Juan, PR	89 (tie)	2.2	Social Determinants of Health	DrPH				X		In person	https://sp.rcm.upr.edu/asuntos-academicos/programas-academicos/doctorado-en-salud-publica-drph-con-especialidad-en-determinantes-sociales-de-la-salud/		X		X					X
University of Puerto Rico	San Juan, PR	89 (tie)	2.2	Nutrition	MHS				X		In person	https://sp.rcm.upr.edu/asuntos-academicos/programas-academicos/maestria-en-ciencias-de-la-salud-con-especialidad-en-nutricion/		X	X
University of Puerto Rico	San Juan, PR	89 (tie)	2.2	Health Services Administration	MHSA				X		In person	https://sp.rcm.upr.edu/asuntos-academicos/programas-academicos/maestria-en-administracion-de-servicios-de-salud-mhsa/		X	X					X
University of Puerto Rico	San Juan, PR	89 (tie)	2.2	Biostatistics	MPH				X		In person	https://sp.rcm.upr.edu/asuntos-academicos/programas-academicos/maestria-en-salud-publica-con-especialidad-en-bioestadistica/		X	X		X
University of Puerto Rico	San Juan, PR	89 (tie)	2.2	Environmental Health	MPH				X		In person	https://sp.rcm.upr.edu/asuntos-academicos/programas-academicos/maestria-en-salud-publica-con-especialidad-en-salud-ambiental-diurno-y-vespertino/		X	X				X
University of Puerto Rico	San Juan, PR	89 (tie)	2.2	Epidemiology	MPH				X		In person	https://sp.rcm.upr.edu/asuntos-academicos/programas-academicos/maestria-en-salud-publica-con-especialidad-en-epidemiologia/		X	X			X
University of Puerto Rico	San Juan, PR	89 (tie)	2.2	General Public Health	MPH				X		In person	https://sp.rcm.upr.edu/asuntos-academicos/programas-academicos/maestria-en-salud-publica-general-diurno-vespertino-mph/		X	X
University of Puerto Rico	San Juan, PR	89 (tie)	2.2	Gerontology	MPH				X		In person	https://sp.rcm.upr.edu/asuntos-academicos/programas-academicos/maestria-en-salud-publica-con-especialidad-en-gerontologia-vespertino/		X	X
University of Puerto Rico	San Juan, PR	89 (tie)	2.2	Public Health Education	MPH				X		In person	https://sp.rcm.upr.edu/asuntos-academicos/programas-academicos/maestria-en-educacion-en-salud-publica-diurno-y-vespertino/		X	X						X
University of Puerto Rico	San Juan, PR	89 (tie)	2.2	Demography	MS				X		In person	https://sp.rcm.upr.edu/asuntos-academicos/programas-academicos/maestria-en-ciencias-en-demografia/		X	X
University of Puerto Rico	San Juan, PR	89 (tie)	2.2	Epidemiology	MS				X		In person	https://sp.rcm.upr.edu/asuntos-academicos/programas-academicos/maestria-en-ciencias-con-especialidad-en-epidemiologia/		X	X			X
University of Puerto Rico	San Juan, PR	89 (tie)	2.2	Health Systems Evaluative Research	MS				X		In person	https://sp.rcm.upr.edu/asuntos-academicos/programas-academicos/maestria-en-ciencias-con-especialidad-en-investigacion-evaluativa-de-sistemas-de-salud-ms/		X	X
University of Puerto Rico	San Juan, PR	89 (tie)	2.2	Industrial Hygiene	MS				X		In person	https://sp.rcm.upr.edu/asuntos-academicos/programas-academicos/maestria-en-ciencias-de-higiene-industrial/		X	X				X
University of Utah	Salt Lake City, UT	89 (tie)	2.2	Community Health	MPH	X				strongly recommended	In person	https://medicine.utah.edu/dfpm/public-health/programs/master-public-health/curriculum.php	https://web.archive.org/web/20200919195020/https://medicine.utah.edu/dfpm/public-health/programs/master-public-health/application.php	X	X						X
University of Utah	Salt Lake City, UT	89 (tie)	2.2	General Public Health	MPH	X				strongly recommended	In person	https://medicine.utah.edu/dfpm/public-health/programs/master-public-health/curriculum.php	https://web.archive.org/web/20200919195020/https://medicine.utah.edu/dfpm/public-health/programs/master-public-health/application.php	X	X
University of Utah	Salt Lake City, UT	89 (tie)	2.2	Global Health	MPH	X				strongly recommended	In person	https://medicine.utah.edu/dfpm/public-health/programs/master-public-health/curriculum.php	https://web.archive.org/web/20200919195020/https://medicine.utah.edu/dfpm/public-health/programs/master-public-health/application.php	X	X
University of Utah	Salt Lake City, UT	89 (tie)	2.2	Public Health	MSPH				X		In person	https://medicine.utah.edu/dfpm/public-health/programs/master-science-public-health/		X	X
University of Utah	Salt Lake City, UT	89 (tie)	2.2	Biostatistics	Mstat	X				optional	In person	https://medicine.utah.edu/dfpm/public-health/programs/mstat-biostatistics/	https://web.archive.org/web/20200919195217/https://medicine.utah.edu/dfpm/public-health/programs/mstat-biostatistics/application.php	X	X		X
University of Utah	Salt Lake City, UT	89 (tie)	2.2	Public Health	PhD				X		In person	https://medicine.utah.edu/dfpm/public-health/programs/phd/		X		X
University of Wisconsin--Milwaukee	Milwaukee, WI	89 (tie)	2.2	Biostatistics	MS				X		In person	https://uwm.edu/publichealth/ms-biostatistics/		X	X		X
University of Wisconsin--Milwaukee	Milwaukee, WI	89 (tie)	2.2	Environmental Health Sciences	PhD				X		In person	https://uwm.edu/publichealth/doctoral-environmental-health-sciences/		X		X			X
University of Wisconsin--Milwaukee	Milwaukee, WI	89 (tie)	2.2	Epidemiology	PhD				X		In person	https://uwm.edu/publichealth/phd-in-epidemiology/		X		X		X
University of Wisconsin--Milwaukee	Milwaukee, WI	89 (tie)	2.2	Public Health: Biostatistics	PhD				X		In person	https://uwm.edu/publichealth/doctoral-biostatistics/		X		X	X
University of Wisconsin--Milwaukee	Milwaukee, WI	89 (tie)	2.2	Public Health: Community and Behavioral Health Promotion	PhD				X		In person	https://uwm.edu/publichealth/doctoral-community-behavioral-health-promotion/		X		X					X
Virginia Tech	Blacksburg, VA	89 (tie)	2.2	Infectious Disease	MPH	X				-	In person	https://publichealth.vt.edu/curriculum/graduateprogram/master-of-public-health--mph--degree/concentrations0/id_concentration.html	https://web.archive.org/web/20200919200315/https://publichealth.vt.edu/curriculum/graduateprogram/master-of-public-health--mph--degree/admissions.html	X	X
Virginia Tech	Blacksburg, VA	89 (tie)	2.2	Public Health Education	MPH	X				-	In person	https://publichealth.vt.edu/curriculum/graduateprogram/master-of-public-health--mph--degree/concentrations0/phe_concentration.html	https://web.archive.org/web/20200919200315/https://publichealth.vt.edu/curriculum/graduateprogram/master-of-public-health--mph--degree/admissions.html	X	X						X
Charles R. Drew University of Medicine and Science	Los Angeles, CA	102 (tie)	2.1	Urban Health Disparities	MPH	X				-	In person (night classes)	https://www.cdrewu.edu/cosh/MPH	https://web.archive.org/web/20200919200445/https://www.cdrewu.edu/COSH/MPH/Admissions	X	X
Medical College of Wisconsin	Milwaukee, WI	102 (tie)	2.1	Public Health Practice	MPH	X				optional	Online	https://www.mcw.edu/education/graduate-school/graduate-school-programs/public-health/mph-program	https://web.archive.org/web/20200919200745/https://www.mcw.edu/education/graduate-school/graduate-school-programs/public-health/mph-program	X	X
Medical College of Wisconsin	Milwaukee, WI	102 (tie)	2.1	Global Health Equity	MS	X				optional	In person	https://www.mcw.edu/education/graduate-school/graduate-school-programs/public-health/global-health-equity-ms	https://web.archive.org/web/20200919200841/https://www.mcw.edu/education/graduate-school/graduate-school-programs/public-health/global-health-equity-ms	X	X
Medical College of Wisconsin	Milwaukee, WI	102 (tie)	2.1	Biostatistics	PhD				X		In person	https://www.mcw.edu/education/graduate-school/graduate-school-programs/biostatistics		X		X	X
Medical College of Wisconsin	Milwaukee, WI	102 (tie)	2.1	Public and Community Health	PhD	X				optional	In person	https://www.mcw.edu/education/graduate-school/graduate-school-programs/public-health/public-and-community-health-phd	https://web.archive.org/web/20200919200929/https://www.mcw.edu/education/graduate-school/graduate-school-programs/public-health/public-and-community-health-phd	X		X					X
New York Medical College	Valhalla, NY	102 (tie)	2.1	Health Policy	DrPH				X		In person	https://www.nymc.edu/school-of-health-sciences-and-practice-shsp/shsp-academics/degrees/doctor-of-public-health-drph/		X		X				X
New York Medical College	Valhalla, NY	102 (tie)	2.1	Environmental Health Science	MPH	X				-	In person (night classes), hybrid, online	https://www.nymc.edu/school-of-health-sciences-and-practice-shsp/shsp-academics/degrees/master-of-public-health-mph/specializations/environmental-health-science/	https://web.archive.org/web/20200919201511/https://www.nymc.edu/school-of-health-sciences-and-practice-shsp/admissions--financial-aid/admission-requirements/master-of-public-health-mph/	X	X				X
New York Medical College	Valhalla, NY	102 (tie)	2.1	Epidemiology	MPH	X				-	In person (night classes)	https://www.nymc.edu/school-of-health-sciences-and-practice-shsp/shsp-academics/degrees/master-of-public-health-mph/specializations/epidemiology/	https://web.archive.org/web/20200919201511/https://www.nymc.edu/school-of-health-sciences-and-practice-shsp/admissions--financial-aid/admission-requirements/master-of-public-health-mph/	X	X			X
New York Medical College	Valhalla, NY	102 (tie)	2.1	Health Behavior and Community Health	MPH	X				-	In person (night classes), hybrid, online	https://www.nymc.edu/school-of-health-sciences-and-practice-shsp/shsp-academics/degrees/master-of-public-health-mph/specializations/health-behavior-and-community-health/	https://web.archive.org/web/20200919201511/https://www.nymc.edu/school-of-health-sciences-and-practice-shsp/admissions--financial-aid/admission-requirements/master-of-public-health-mph/	X	X						X
New York Medical College	Valhalla, NY	102 (tie)	2.1	Health Policy and Management	MPH	X				-	In person (night classes), hybrid, online	https://www.nymc.edu/school-of-health-sciences-and-practice-shsp/shsp-academics/degrees/master-of-public-health-mph/specializations/health-policy-and-management/	https://web.archive.org/web/20200919201511/https://www.nymc.edu/school-of-health-sciences-and-practice-shsp/admissions--financial-aid/admission-requirements/master-of-public-health-mph/	X	X					X
New York Medical College	Valhalla, NY	102 (tie)	2.1	Biostatistics	MS	X				-	In person (night classes)	https://www.nymc.edu/school-of-health-sciences-and-practice-shsp/shsp-academics/degrees/ms-in-biostatistics/	https://web.archive.org/web/20200919201638/https://www.nymc.edu/school-of-health-sciences-and-practice-shsp/admissions--financial-aid/admission-requirements/ms-in-biostatistics/	X	X		X
Purdue University	West Lafayette, IN	102 (tie)	2.1	Environmental Health Sciences	MPH	X				-	In person	https://www.purdue.edu/hhs/public-health/graduate/academic-degrees/mph-in-person-hybrid/concentrations.php	https://web.archive.org/web/20200919201928/https://www.purdue.edu/hhs/public-health/graduate/academic-degrees/mph-in-person-hybrid/application.php	X	X				X
Purdue University	West Lafayette, IN	102 (tie)	2.1	Family and Community Health Sciences	MPH	X				-	In person	https://www.purdue.edu/hhs/public-health/graduate/academic-degrees/mph-in-person-hybrid/concentrations.php	https://web.archive.org/web/20200919201928/https://www.purdue.edu/hhs/public-health/graduate/academic-degrees/mph-in-person-hybrid/application.php	X	X						X
Purdue University	West Lafayette, IN	102 (tie)	2.1	Health Statistics	MPH	X				-	In person	https://www.purdue.edu/hhs/public-health/graduate/academic-degrees/mph-in-person-hybrid/concentrations.php	https://web.archive.org/web/20200919201928/https://www.purdue.edu/hhs/public-health/graduate/academic-degrees/mph-in-person-hybrid/application.php	X	X
Purdue University	West Lafayette, IN	102 (tie)	2.1	Public Health	MPH	X				-	Online	https://online.purdue.edu/programs/health-sciences/masters-in-public-health	https://web.archive.org/web/20200919201956/https://online.purdue.edu/programs/health-sciences/masters-in-public-health	X	X
Purdue University	West Lafayette, IN	102 (tie)	2.1	Public Health	MS	X				-	In person	https://www.purdue.edu/hhs/public-health/graduate/academic-degrees/MS-PhD/index.php	https://web.archive.org/web/20200919202159/https://www.purdue.edu/hhs/public-health/graduate/academic-degrees/MS-PhD/admissions.php	X	X
Purdue University	West Lafayette, IN	102 (tie)	2.1	Public Health	PhD	X				-	In person	https://www.purdue.edu/hhs/public-health/graduate/academic-degrees/MS-PhD/index.php	https://web.archive.org/web/20200919202159/https://www.purdue.edu/hhs/public-health/graduate/academic-degrees/MS-PhD/admissions.php	X		X
San Jose State University	San Jose, CA	102 (tie)	2.1	Public Health	MPH				X		In person, online	https://www.sjsu.edu/hsr/academicprograms/mph/index.html		X	X
SUNY Downstate Medical Center	Brooklyn, NY	102 (tie)	2.1	Community Health Sciences	DrPH				X		In person	https://www.downstate.edu/publichealth/programs/doctor-of-public-health.html		X		X					X
SUNY Downstate Medical Center	Brooklyn, NY	102 (tie)	2.1	Environmental and Occupational Health Sciences	DrPH				X		In person	https://www.downstate.edu/publichealth/programs/doctor-of-public-health.html		X		X			X
SUNY Downstate Medical Center	Brooklyn, NY	102 (tie)	2.1	Epidemiology	DrPH				X		In person	https://www.downstate.edu/publichealth/programs/doctor-of-public-health.html		X		X		X
SUNY Downstate Medical Center	Brooklyn, NY	102 (tie)	2.1	Biostatistics	MPH			Spring 2021, Fall 2020, Summer 2020		optional?	In person	https://www.downstate.edu/publichealth/programs/master-of-public-health.html	https://web.archive.org/web/20200919202650/https://www.downstate.edu/publichealth/admissions/admission-mph.html , https://web.archive.org/web/20200823194908/https://www.downstate.edu/publichealth/admissions/admission-mph.html	X	X		X
SUNY Downstate Medical Center	Brooklyn, NY	102 (tie)	2.1	Community Health Sciences	MPH			Spring 2021, Fall 2020, Summer 2020		optional?	In person	https://www.downstate.edu/publichealth/programs/master-of-public-health.html	https://web.archive.org/web/20200919202650/https://www.downstate.edu/publichealth/admissions/admission-mph.html , https://web.archive.org/web/20200823194908/https://www.downstate.edu/publichealth/admissions/admission-mph.html	X	X						X
SUNY Downstate Medical Center	Brooklyn, NY	102 (tie)	2.1	Environmental and Occupational Health Sciences	MPH			Spring 2021, Fall 2020, Summer 2020		optional?	In person	https://www.downstate.edu/publichealth/programs/master-of-public-health.html	https://web.archive.org/web/20200919202650/https://www.downstate.edu/publichealth/admissions/admission-mph.html , https://web.archive.org/web/20200823194908/https://www.downstate.edu/publichealth/admissions/admission-mph.html	X	X				X
SUNY Downstate Medical Center	Brooklyn, NY	102 (tie)	2.1	Epidemiology	MPH			Spring 2021, Fall 2020, Summer 2020		optional?	In person	https://www.downstate.edu/publichealth/programs/master-of-public-health.html	https://web.archive.org/web/20200919202650/https://www.downstate.edu/publichealth/admissions/admission-mph.html , https://web.archive.org/web/20200823194908/https://www.downstate.edu/publichealth/admissions/admission-mph.html	X	X			X
SUNY Downstate Medical Center	Brooklyn, NY	102 (tie)	2.1	Health Policy and Management	MPH			Spring 2021, Fall 2020, Summer 2020		optional?	In person	https://www.downstate.edu/publichealth/programs/master-of-public-health.html	https://web.archive.org/web/20200919202650/https://www.downstate.edu/publichealth/admissions/admission-mph.html , https://web.archive.org/web/20200823194908/https://www.downstate.edu/publichealth/admissions/admission-mph.html	X	X					X
University of Kansas	Kansas City, KS	102 (tie)	2.1	Health Services Administration	MHSA				X		In person	http://www.kumc.edu/school-of-medicine/population-health/education/master-of-health-services-administration-(mhsa).html		X	X					X
University of Kansas	Kansas City, KS	102 (tie)	2.1	Epidemiology	MPH	X				optional	In person	http://www.kumc.edu/school-of-medicine/population-health/education/master-of-public-health/prospective-students/program-curriculum.html	https://web.archive.org/web/20200919203044/http://www.kumc.edu/school-of-medicine/population-health/education/master-of-public-health/admissions.html	X	X			X
University of Kansas	Kansas City, KS	102 (tie)	2.1	Public Health Practice	MPH	X				optional	In person	http://www.kumc.edu/school-of-medicine/population-health/education/master-of-public-health/prospective-students/program-curriculum.html	https://web.archive.org/web/20200919203044/http://www.kumc.edu/school-of-medicine/population-health/education/master-of-public-health/admissions.html	X	X
University of Kansas	Kansas City, KS	102 (tie)	2.1	Biostatistics	MS				X		In person	https://catalog.ku.edu/medicine/biostatistics/ms/		X	X		X
University of Kansas	Kansas City, KS	102 (tie)	2.1	Clinical Research	MS				X		In person	http://www.kumc.edu/school-of-medicine/population-health/education/master-of-science-in-clinical-research.html		X	X
University of Kansas	Kansas City, KS	102 (tie)	2.1	Biostatistics	PhD				X		In person	https://catalog.ku.edu/medicine/biostatistics/phd/		X		X	X
University of Kansas	Kansas City, KS	102 (tie)	2.1	Health Policy and Management	PhD				X		In person	http://www.kumc.edu/school-of-medicine/population-health/education/phd-in-health-policy-and-management.html		X		X				X
University of Nevada--Las Vegas	Las Vegas, NV	102 (tie)	2.1	Health Care Administration	MHA				X		In person	https://www.unlv.edu/degree/mha		X	X
University of Nevada--Las Vegas	Las Vegas, NV	102 (tie)	2.1	Biostatistics and Epidemiology	MPH				X		In person	https://www.unlv.edu/degree/mph		X	X		X	X
University of Nevada--Las Vegas	Las Vegas, NV	102 (tie)	2.1	Environmental and Occupational Health	MPH				X		In person	https://www.unlv.edu/degree/mph		X	X				X
University of Nevada--Las Vegas	Las Vegas, NV	102 (tie)	2.1	Health Care Administration and Policy	MPH				X		In person	https://www.unlv.edu/degree/mph		X	X					X
University of Nevada--Las Vegas	Las Vegas, NV	102 (tie)	2.1	Social and Behavioral Health	MPH				X		In person	https://www.unlv.edu/degree/mph		X	X						X
University of Nevada--Las Vegas	Las Vegas, NV	102 (tie)	2.1	Public Health	PhD				X		In person	https://www.unlv.edu/degree/phd-public-health		X		X
University of New Mexico	Albuquerque, NM	102 (tie)	2.1	Community Health	MPH			Fall 2020		optional?	In person	https://hsc.unm.edu/population-health/programs/graduate-programs/concentrations/community-health.html	https://archive.vn/TT6h3	X	X						X
University of New Mexico	Albuquerque, NM	102 (tie)	2.1	Epidemiology	MPH			Fall 2020		optional?	In person	https://hsc.unm.edu/population-health/programs/graduate-programs/concentrations/epidemiology.html	https://archive.vn/TT6h3	X	X			X
University of New Mexico	Albuquerque, NM	102 (tie)	2.1	Health Systems Services and Policy	MPH			Fall 2020		optional?	In person	https://hsc.unm.edu/population-health/programs/graduate-programs/concentrations/systems-policy.html	https://archive.vn/TT6h3	X	X					X
Wayne State University	Detroit, MI	102 (tie)	2.1	Public Health Methods in Urban Health	MPH				X		In person	https://familymedicine.med.wayne.edu/mph		X	X
Wayne State University	Detroit, MI	102 (tie)	2.1	Public Health Practice	MPH				X		In person	https://familymedicine.med.wayne.edu/mph		X	X
West Virginia University	Morgantown, WV	102 (tie)	2.1	Health Administration	MHA				X		In person	http://publichealth.wvu.edu/students/graduate-programs/master-of-health-administration/		X	X
West Virginia University	Morgantown, WV	102 (tie)	2.1	Occupational and Environmental Health Sciences	MHA				X		In person	http://publichealth.wvu.edu/students/graduate-programs/master-of-public-health/		X	X				X
West Virginia University	Morgantown, WV	102 (tie)	2.1	Biostatistics	MPH				X		In person	http://publichealth.wvu.edu/students/graduate-programs/master-of-public-health/		X	X		X
West Virginia University	Morgantown, WV	102 (tie)	2.1	Epidemiology	MPH				X		In person	http://publichealth.wvu.edu/students/graduate-programs/master-of-public-health/		X	X			X
West Virginia University	Morgantown, WV	102 (tie)	2.1	Health Policy	MPH				X		In person	http://publichealth.wvu.edu/students/graduate-programs/master-of-public-health/		X	X					X
West Virginia University	Morgantown, WV	102 (tie)	2.1	Social and Behavioral Sciences	MPH				X		In person	http://publichealth.wvu.edu/students/graduate-programs/master-of-public-health/		X	X						X
West Virginia University	Morgantown, WV	102 (tie)	2.1	Biostatistics	MS				X		In person	http://publichealth.wvu.edu/students/graduate-programs/master-of-science-in-biostatistics/		X	X		X
West Virginia University	Morgantown, WV	102 (tie)	2.1	Public Health Sciences: Epidemiology	PhD				X		In person	http://publichealth.wvu.edu/students/graduate-programs/phd-in-public-health-sciences/epidemiology/		X		X		X
West Virginia University	Morgantown, WV	102 (tie)	2.1	Public Health Sciences: Occupational and Environmental Health Sciences	PhD				X		In person	http://publichealth.wvu.edu/students/graduate-programs/phd-in-public-health-sciences/occupational-and-environmental-health-sciences/		X		X			X
[truncated: 294 more rows]
